# Supplementary material for: A rationally designed metal-binding helical peptoid for selective recognition processes
Source: Royal Society of Chemistry journal article supplement (doi:10.1039/c5sc04358a), 2016-01-01
Supplement: c5sc04358a1.pdf [file c5sc04358a1.pdf]

# A Rationally Designed Metal-Binding Helical Peptoid for Selective Recognition Processes

Maria Baskin and Galia Maayan

*Schulich Faculty of Chemistry, Technion- Israel Institute of Technology, Haifa, Israel, 32000*

## Supporting Information

### Table of Contents

|                                                                                           |       |
|-------------------------------------------------------------------------------------------|-------|
| 1. Instrumentation.....                                                                   | 2     |
| 2. Synthetic scheme of <i>N</i> hq and <i>N</i> terpy.....                                | 2     |
| 3. HPLC data.....                                                                         | 3-5   |
| 4. CD data.....                                                                           | 5-6   |
| 5. UV-vis data.....                                                                       | 7-30  |
| 13.1 UV-Vis of <b>Helix HQT i+3</b> and its metal complexes in MeOH:H <sub>2</sub> O..... | 7-13  |
| 13.2 UV-Vis of control peptoids with mixture of metal ions in MeOH:H <sub>2</sub> O.....  | 13-15 |
| 13.3 UV-Vis of <b>Helix HQT i+3</b> and its metal complexes in ACN.....                   | 15-22 |
| 13.4 UV-Vis of control peptoids and their metal complexes in ACN.....                     | 22-30 |
| 6. Association constants.....                                                             | 30-33 |
| 7. EPR data.....                                                                          | 34    |
| 8. ESI-MS data.....                                                                       | 35-59 |

## Instrumentation:

Peptoid oligomers were analyzed by reversed-phase HPLC (analytical C18(2) column, Phenomenex, Luna 5 $\mu$ m, 100 Å, 2.0x50 mm) on a Jasco UV-2075 PLUS detector. A linear gradient of 5–95% ACN in water (0.1% TFA) over 10 min was used at a flow rate of 700  $\mu$ L/min. Preparative HPLC was performed using a AXIA Packed C18(2) column (Phenomenex, Luna 15 $\mu$ m, 100 Å, 21.20x100mm). Peaks were eluted with a linear gradient of 5–95% ACN in water (0.1% TFA) over 50 min at a flow rate of 5 mL/min. Mass spectrometry of peptoid oligomers and their metal complexes was performed on a Advion expression CMS mass spectrometer under electrospray ionization (ESI), direct probe ACN:H<sub>2</sub>O (95:5), flow rate 0.2 ml/min and on a Waters LCT Premier mass spectrometer under electrospray ionization (ESI), direct probe ACN:H<sub>2</sub>O (70:30), flow rate 0.3 ml/min. UV measurements were performed using an Agilent Cary 60 UV-Vis spectrophotometer, a double beam, Czerny-Turner monochromator. CD measurements were performed using a circular dichroism spectrometer Model Jasco 810 Spectropolarimeter and AppliedPhotophysics Chirascan. ICP measurements were performed using Thermo Scientific iCAP 6000 ICP-OES analyzer. EPR spectra were recorded on a Bruker EMX-10/12 X-band ( $\nu$ =9.4 GHz) digital EPR Spectrometer. Spectra processing and simulation were performed with Bruker WIN-EPR and SimFonia Software. Data processing was done with the softwares Excel and KaleidaGraph.

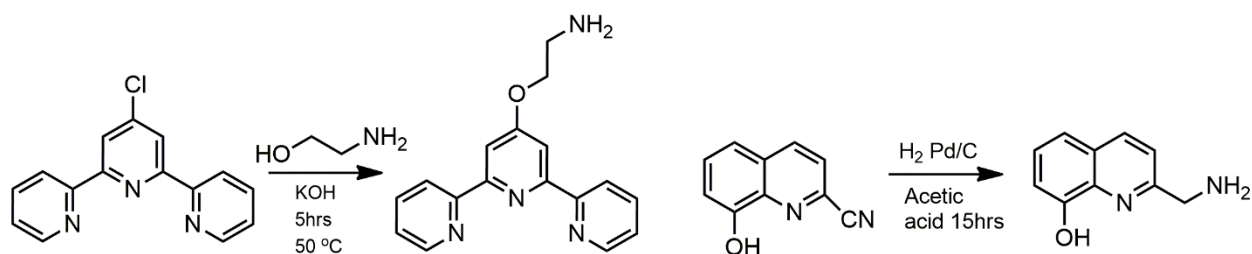

**Scheme 1:** Synthetic routes to the primary amines *Nterpy* and *Nhq*.

## HPLC

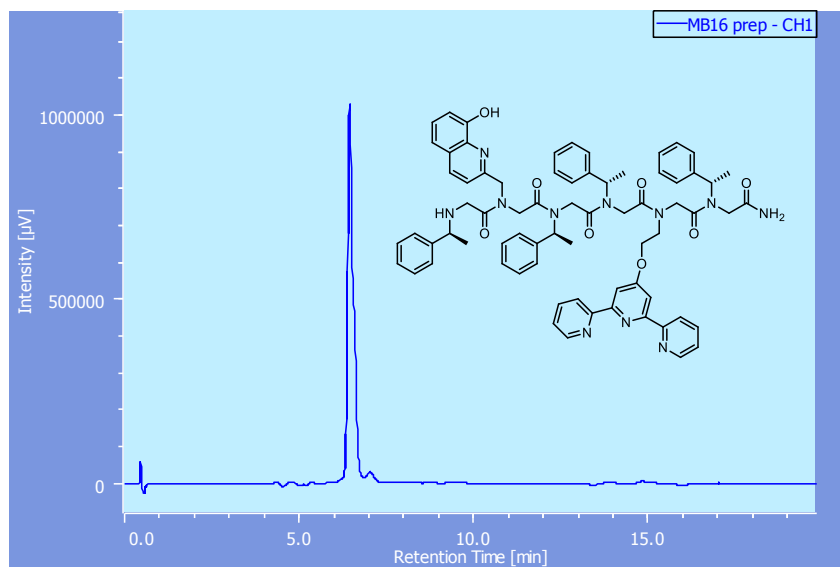

**Figure S1.** HPLC traces of purified peptoid oligomer **Helix HQT i+3** at 214nm.

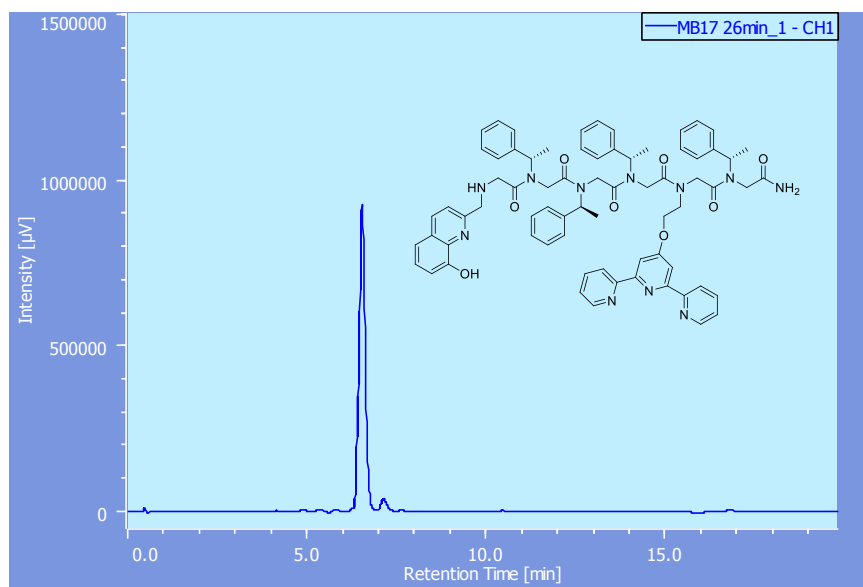

**Figure S2.** HPLC traces of purified peptoid oligomer **Helix HQT i+4** at 214nm.

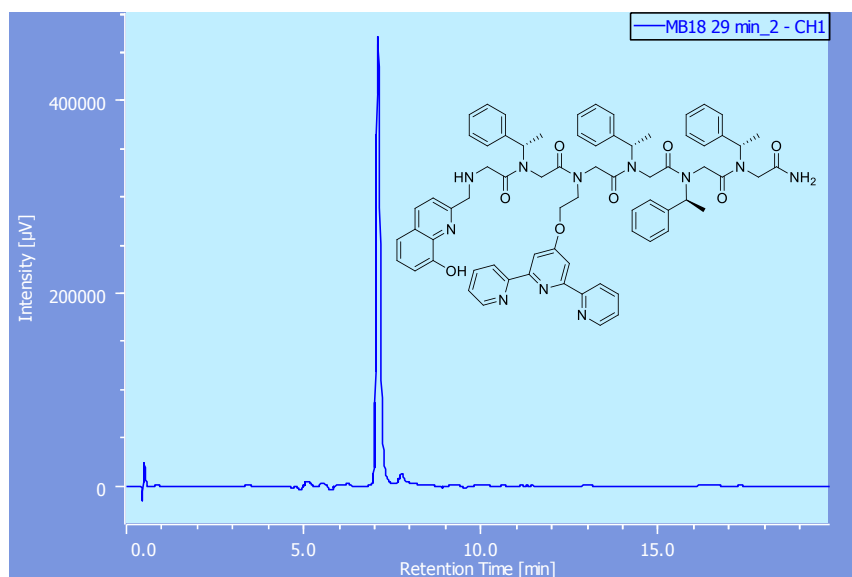

**Figure S3.** HPLC traces of purified peptoid oligomer **Helix HQT i+2** at 214nm.

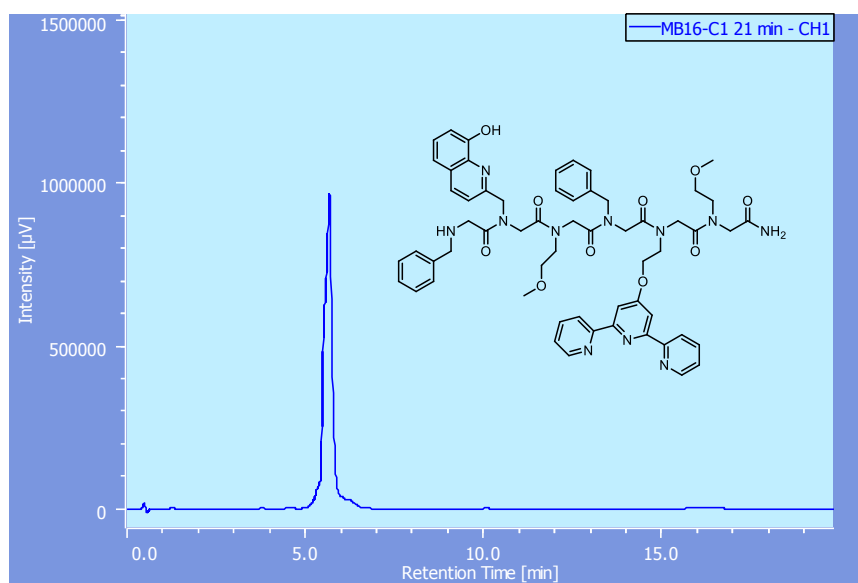

**Figure S4.** HPLC traces of purified peptoid oligomer **Nonhelix HQT i+3** at 214nm.

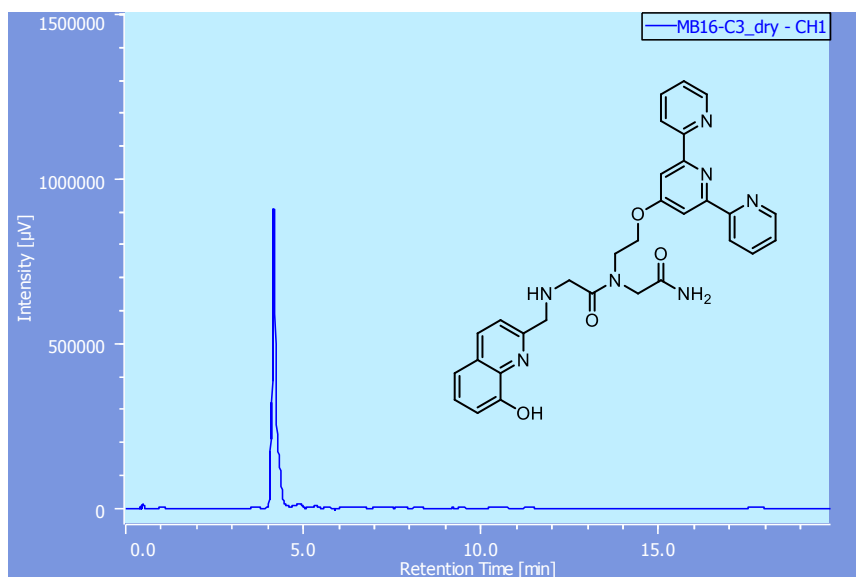

**Figure S5.** HPLC traces of purified peptoid oligomer **DI HQT** at 214nm.

#### CD data

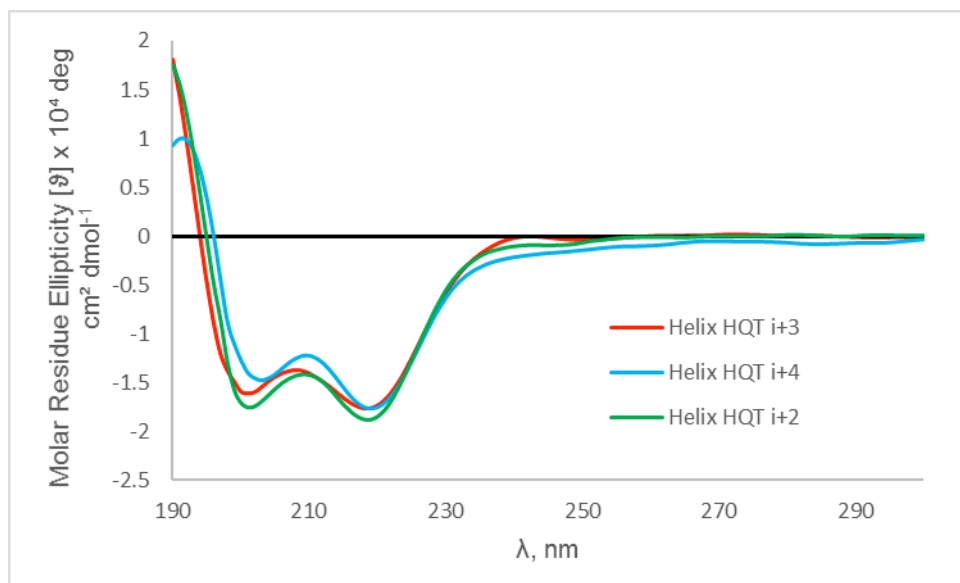

**Figure S6.** CD spectra of peptoid oligomers **Helix HQT i+3**, **Helix HQT i+4** and **Helix HQT i+2**. The spectra were recorded at room temperature, at concentrations of 100  $\mu$ M in MeOH:H<sub>2</sub>O 4:1.

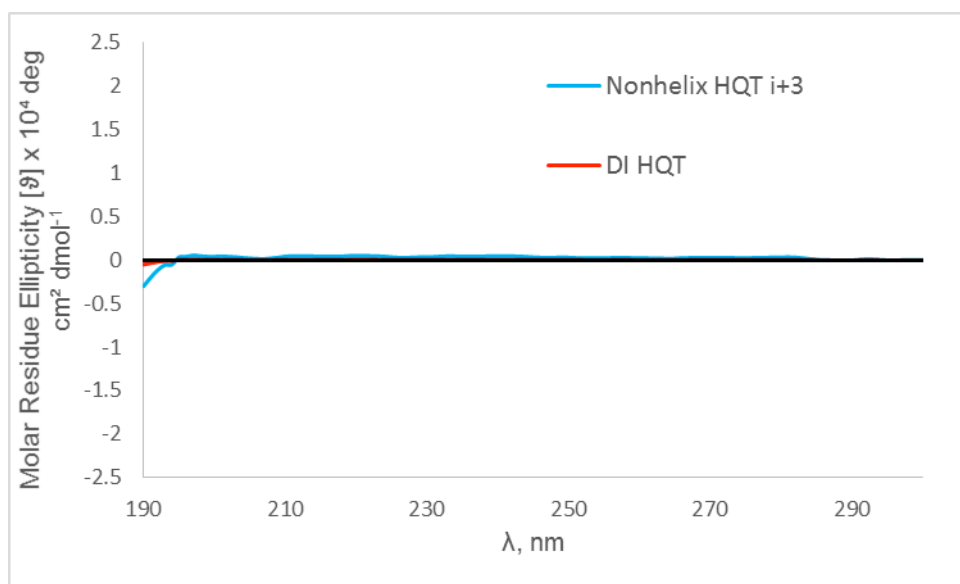

**Figure S7.** CD spectra of peptoid oligomers **Nonhelix HQT i+3** and **DI HQT**. The spectra were recorded at room temperature, at concentrations of 100  $\mu$ M in MeOH:H<sub>2</sub>O 4:1.

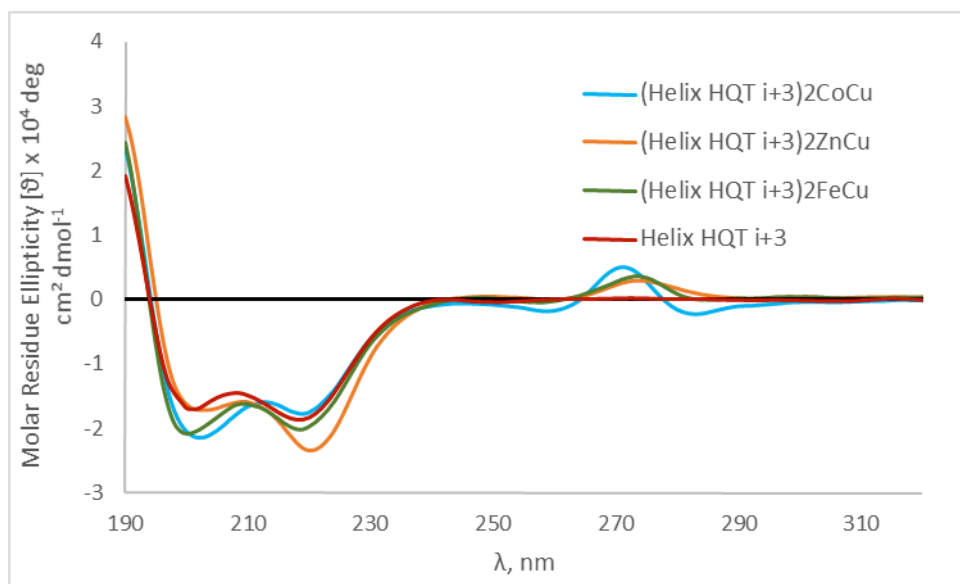

**Figure S8.** CD spectra of hetero bimetallic complexes **(Helix HQT i+3)<sub>2</sub>CoCu**, **(Helix HQT i+3)<sub>2</sub>ZnCu** and **(Helix HQT i+3)<sub>2</sub>FeCu**. The spectra were recorded at room temperature, at concentrations of 100  $\mu$ M in ACN.

## UV-Vis data

UV-Vis of **Helix HQT i+3** and its metal complexes in MeOH/H<sub>2</sub>O

**Table S1.** UV-Vis absorbance data of peptoid oligomer **Helix HQT i+3** and it metal complexes in MeOH/H<sub>2</sub>O 4:1.

| ( <b>Helix HQT i+3</b> )M complex | $\lambda_{\text{max}}$ (nm) | Figure # |
|-----------------------------------|-----------------------------|----------|
| Co <sup>2+</sup>                  | 262, 309                    | S9       |
| Zn <sup>2+</sup>                  | 265, 310, 322               | S10      |
| Mn <sup>2+</sup>                  | 266, 311, 322               | S11      |
| Ni <sup>2+</sup>                  | 268, 312, 325               | S12      |
| Fe <sup>3+</sup>                  | 249, 316, 556               | S13      |

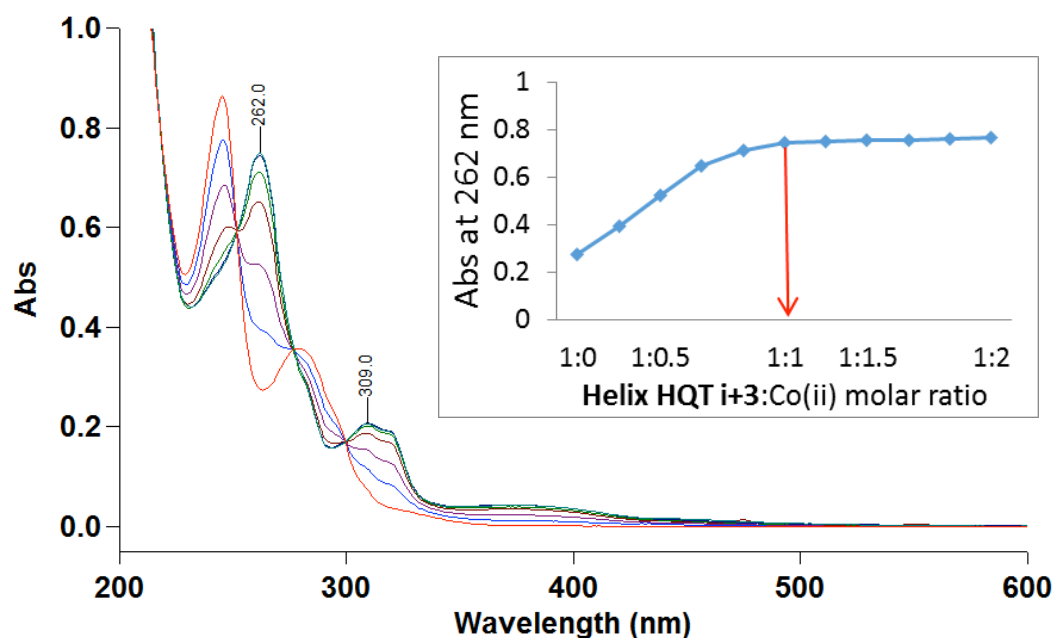

**Figure S9.** UV-Vis titration and a peptoid-to-metal ratio plot of **Helix HQT i+3** (17  $\mu\text{M}$ ) with  $\text{Co}^{2+}$  acetate (5mM) in 3 ml MeOH:H<sub>2</sub>O 4:1.

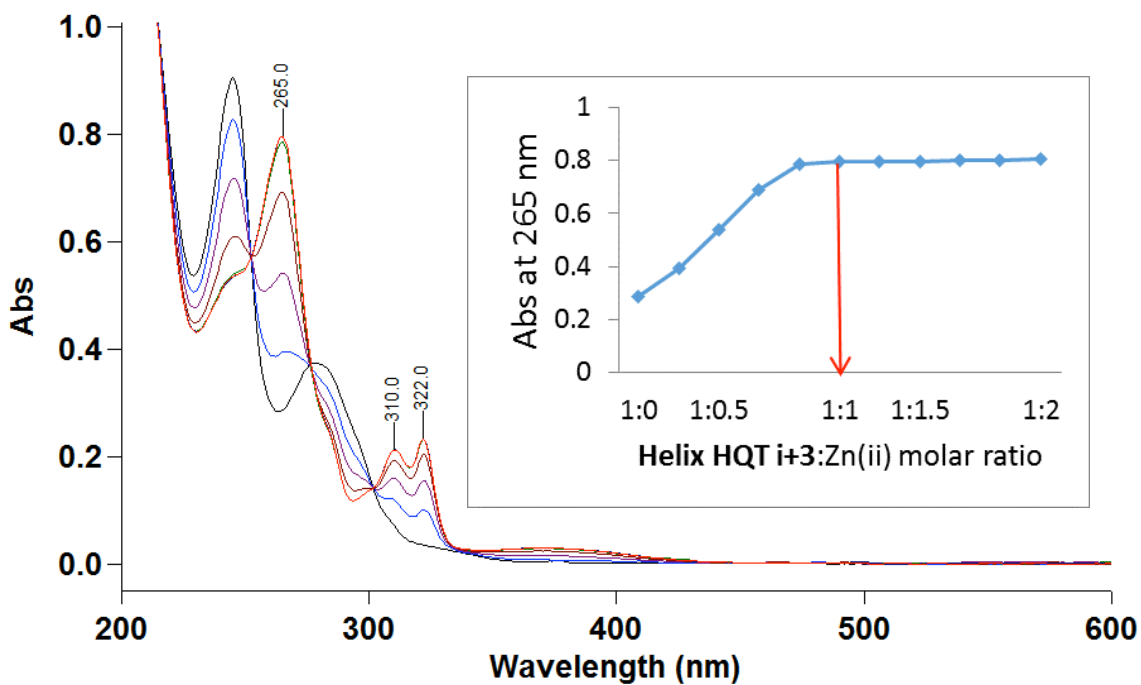

**Figure S10.** UV-Vis titration and a peptoid-to-metal ratio plot of **Helix HQT i+3** (17  $\mu\text{M}$ ) with  $\text{Zn}^{2+}$  acetate (5mM) in 3ml MeOH:H<sub>2</sub>O 4:1.

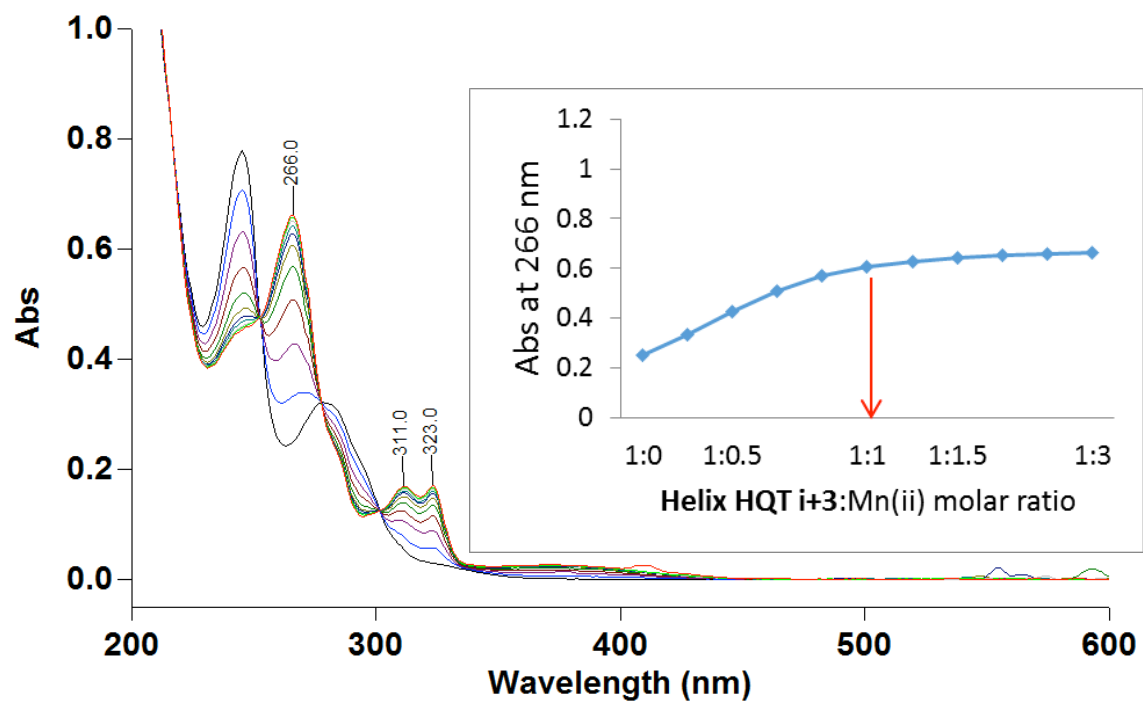

**Figure S11.** UV-Vis titration and a peptoid-to-metal ratio plot of **Helix HQT i+3** (17  $\mu\text{M}$ ) with  $\text{Mn}^{2+}$  acetate (5mM) in 3ml MeOH:H<sub>2</sub>O 4:1.

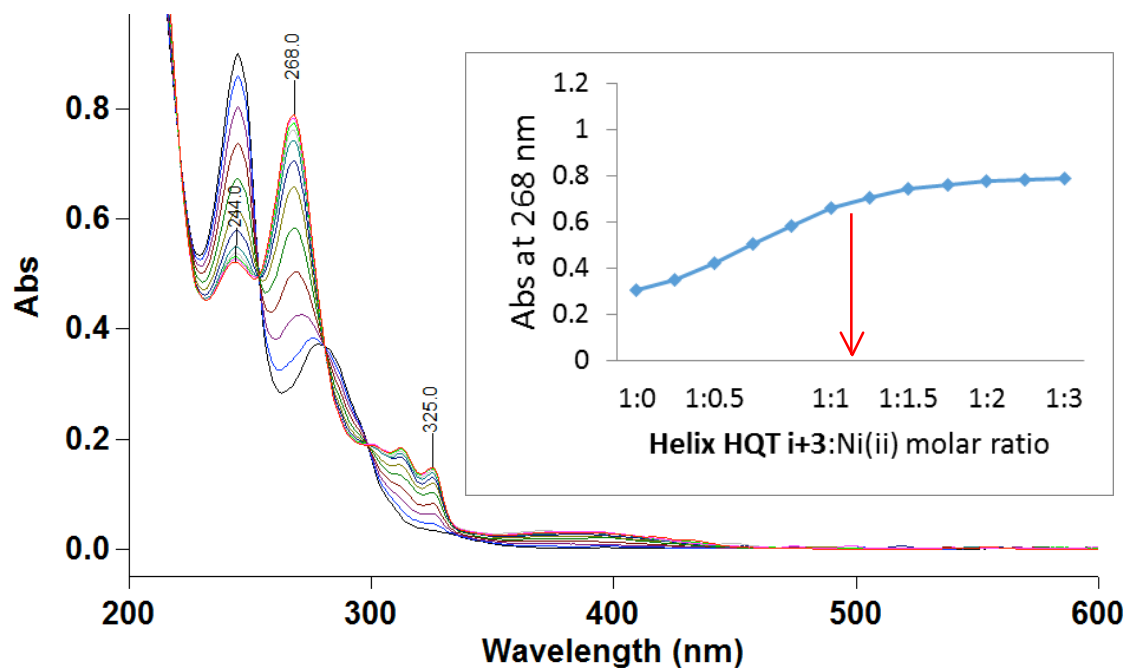

**Figure S12.** UV-Vis titration and a peptoid-to-metal ratio plot of **Helix HQT i+3** (17  $\mu$ M) with  $\text{Ni}^{2+}$  acetate (5mM) in 3ml MeOH:H<sub>2</sub>O 4:1.

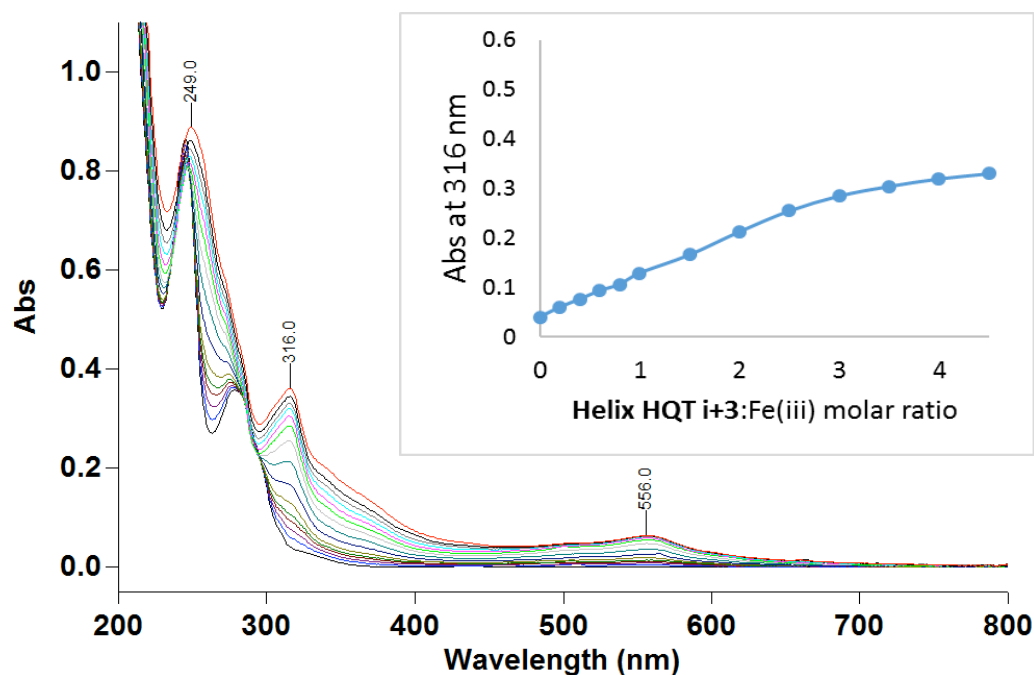

**Figure S13.** UV-Vis titration and a peptoid-to-metal ratio plot of **Helix HQT i+3** (17  $\mu$ M) with  $\text{Ni}^{2+}$  acetate (5mM) in 3ml MeOH:H<sub>2</sub>O 4:1. The peptoid-to-metal ratio plot in this case does not provide information about the binding.

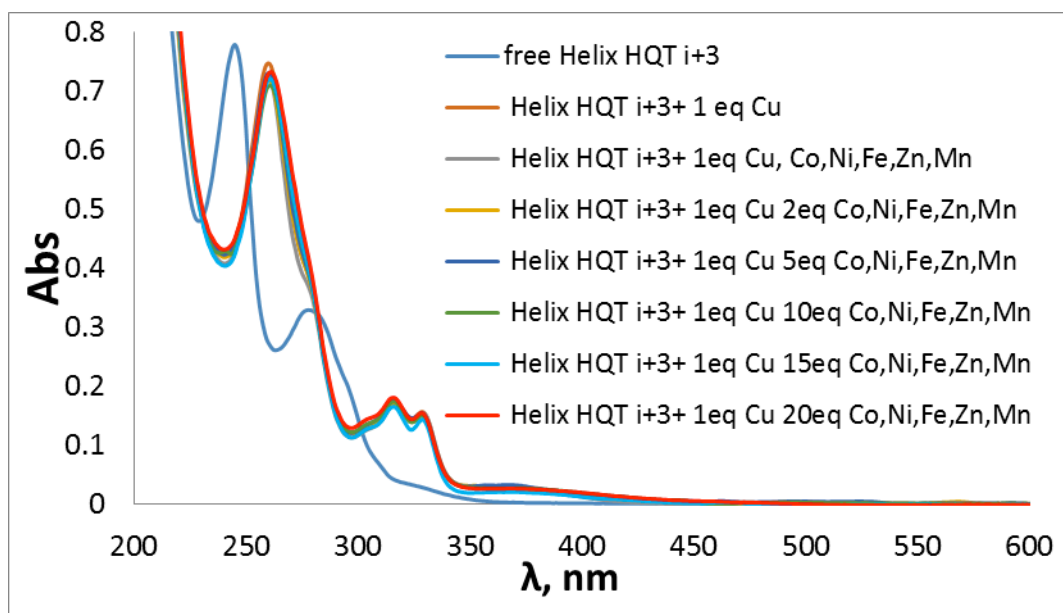

**Figure S14.** UV of **Helix HQT i+3** (17  $\mu\text{M}$ ) with 1 equiv.  $\text{Cu}^{2+}$  and 1-20 equiv. of  $\text{Co}^{2+}$ ,  $\text{Ni}^{2+}$ ,  $\text{Fe}^{3+}$ ,  $\text{Zn}^{2+}$ ,  $\text{Mn}^{2+}$  in MeOH:H<sub>2</sub>O 4:1. Absorption bands off all spectra were 259, 316, 328 nm.

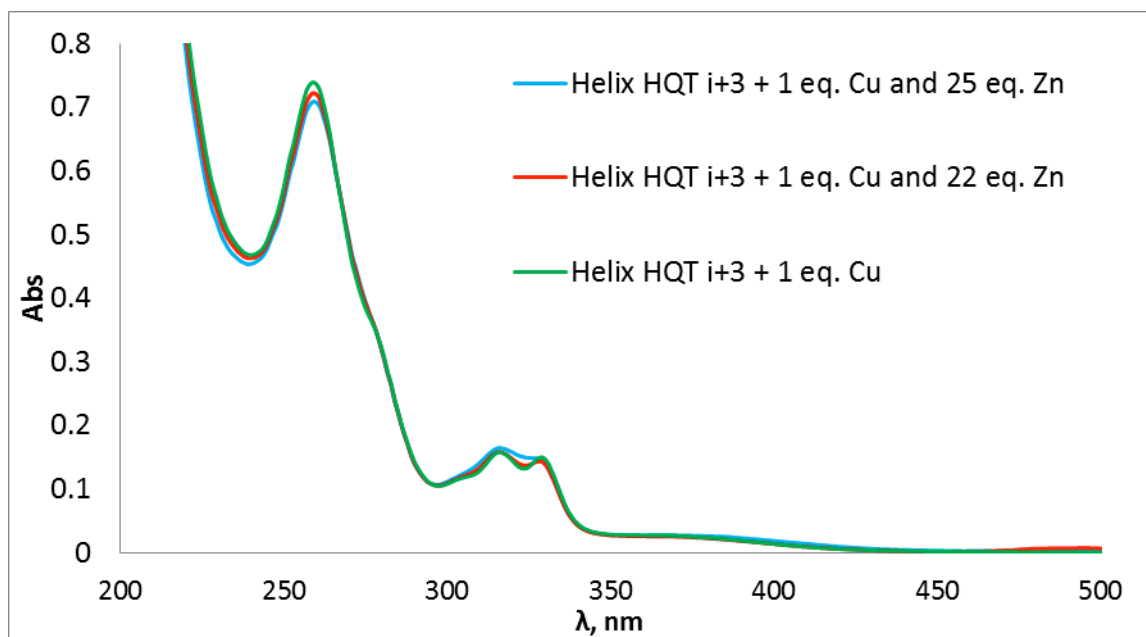

**Figure S15.** UV-VIs of **Helix HQT i+3** (17  $\mu\text{M}$ ) in 5:1 H<sub>2</sub>O:MeOH solution containing  $\text{Cu}^{2+}$  only or mix of 1 equiv.  $\text{Cu}^{2+}$  and 25 or 22 equiv.  $\text{Zn}^{2+}$ .

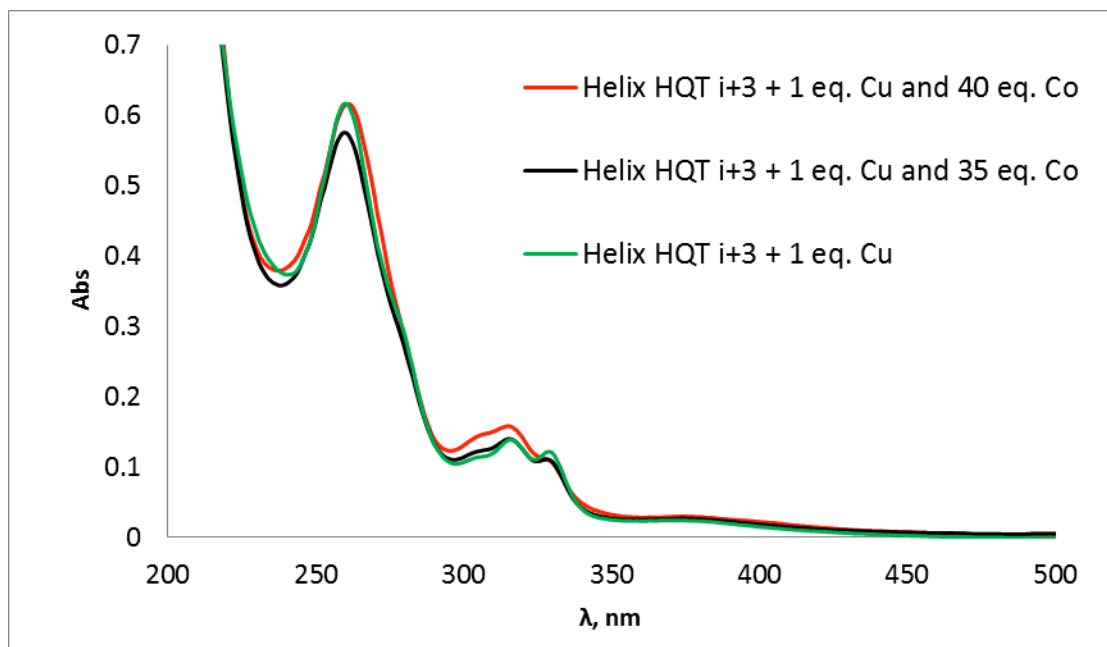

**Figure S16.** UV-Vis of **Helix HQT i+3** (17  $\mu\text{M}$ ) in 5:1  $\text{H}_2\text{O}$ :MeOH solution containing 1 equiv.  $\text{Cu}^{2+}$  only or mix of 1 equiv.  $\text{Cu}^{2+}$  and 35 or 40 equiv. of  $\text{Co}^{2+}$ .

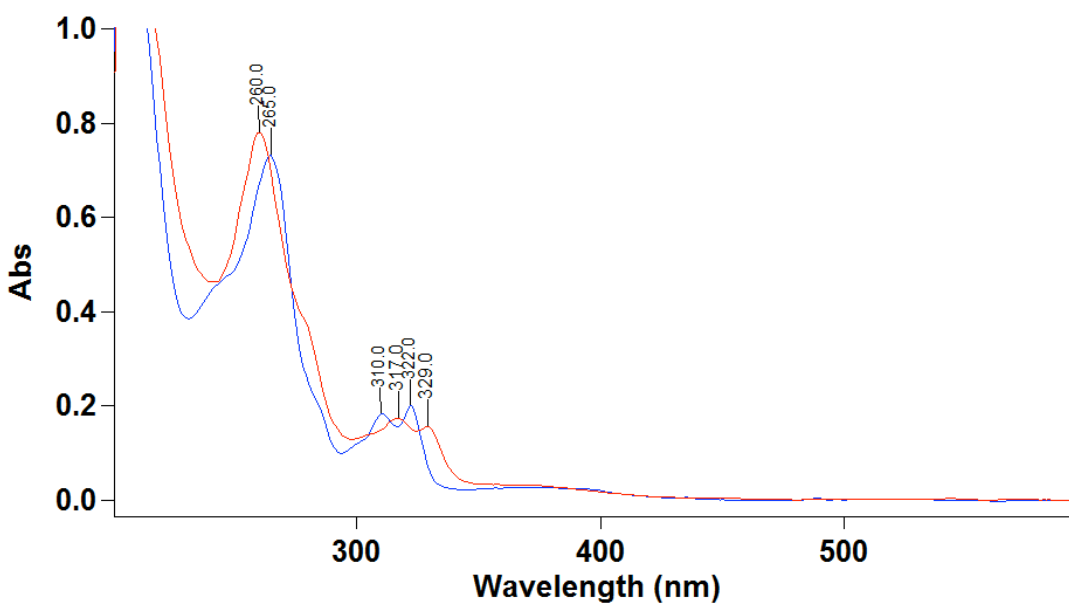

**Figure S17.** UV-Vis of **(Helix HQT i+3)Zn** (blue, 17  $\mu\text{M}$ ) followed by addition of 1 equiv. of  $\text{Cu}^{+2}$  (red) in MeOH/ $\text{H}_2\text{O}$  4:1.

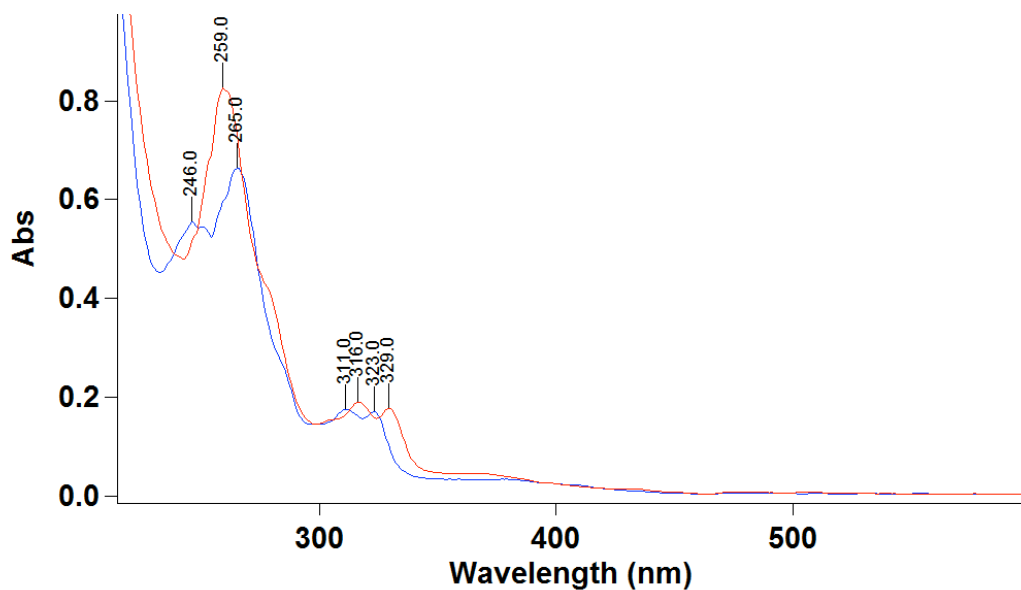

**Figure S18.** UV-Vis of (Helix HQT i+3)Mn (blue, 17  $\mu$ M) followed by addition of 1 equiv. of  $\text{Cu}^{+2}$  (red) in MeOH/H<sub>2</sub>O 4:1.

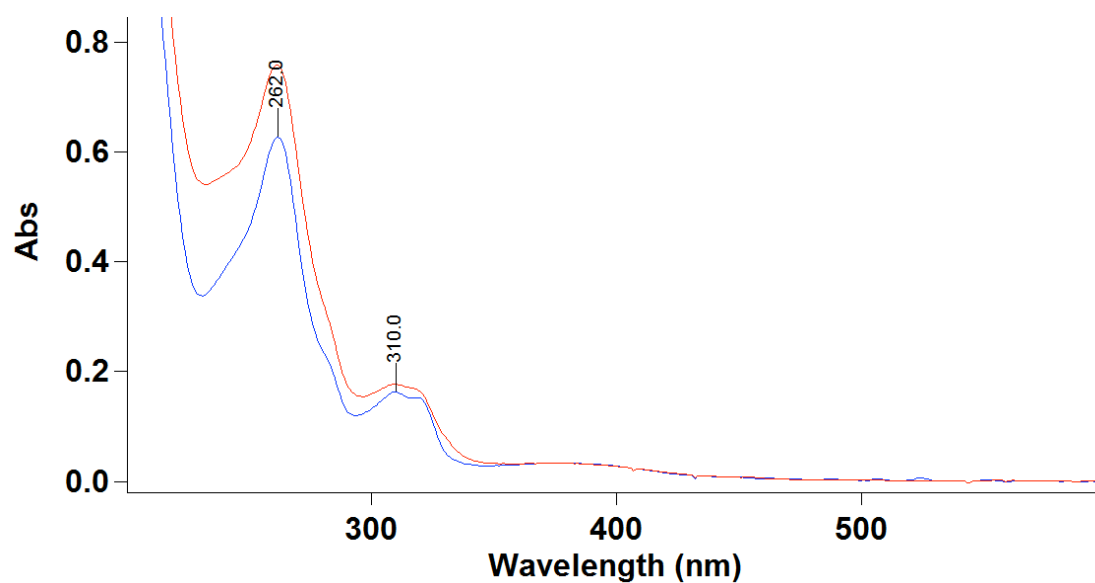

**Figure S19.** UV-Vis of (Helix HQT i+3)Co (blue, 17  $\mu$ M) followed by addition of 1 equiv. of  $\text{Cu}^{+2}$  (red) in MeOH/H<sub>2</sub>O 4:1.

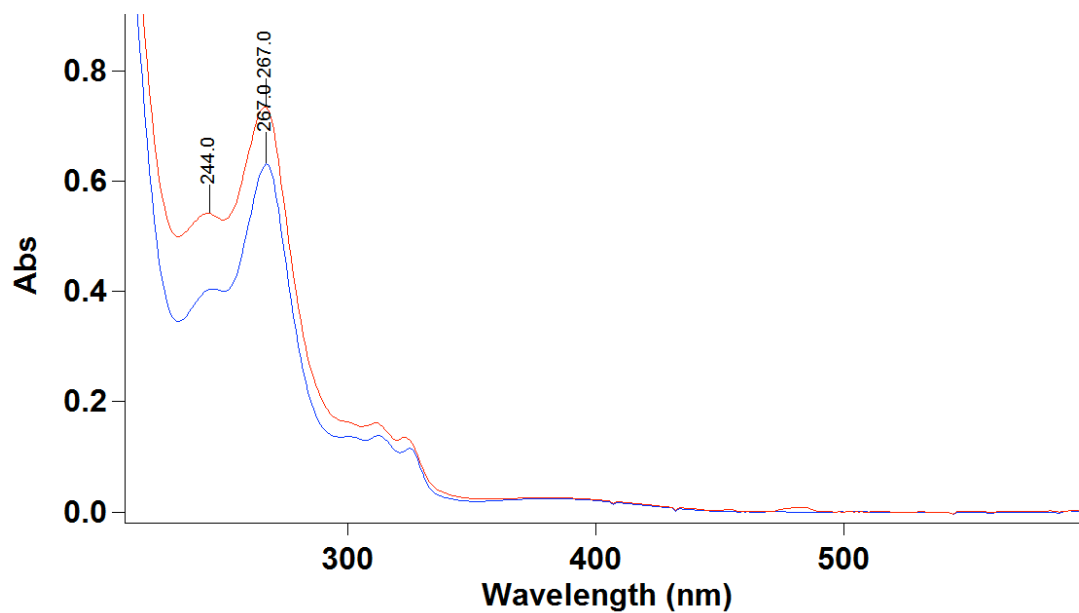

**Figure S20.** UV-Vis of (Helix HQT i+3)Ni (blue, 17  $\mu\text{M}$ ) followed by addition of 1 equiv. of  $\text{Cu}^{+2}$  (red) in MeOH/ $\text{H}_2\text{O}$  4:1.

UV-Vis of control peptides with mixture of metal ions in MeOH: $\text{H}_2\text{O}$

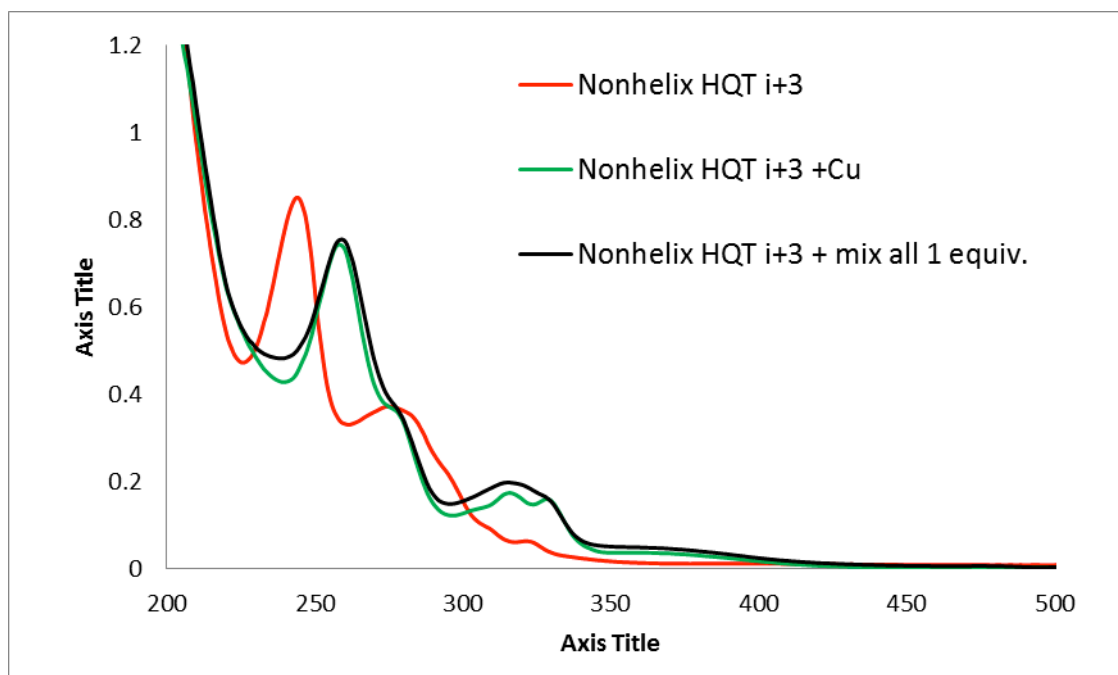

**Figure S21.** UV-Vis of Nonhelix HQT i+3 (17  $\mu\text{M}$ ) with 1 equiv.  $\text{Cu}^{2+}$  and 1 equiv. of  $\text{Cu}^{2+}$ ,  $\text{Co}^{2+}$ ,  $\text{Ni}^{2+}$ ,  $\text{Fe}^{3+}$ ,  $\text{Zn}^{2+}$ ,  $\text{Mn}^{2+}$  in 3ml MeOH: $\text{H}_2\text{O}$  4:1.

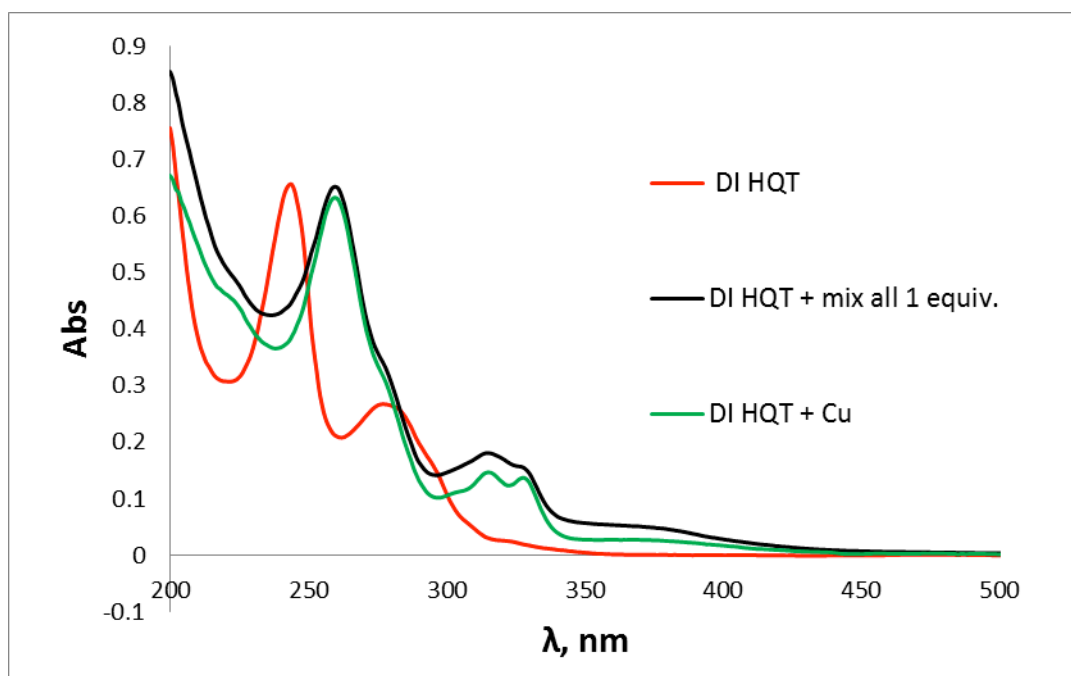

**Figure S22.** UV-Vis of **DI HQT** (17 μM) with 1 equiv.  $\text{Cu}^{2+}$  and 1 equiv. of  $\text{Cu}^{2+}$ ,  $\text{Co}^{2+}$ ,  $\text{Ni}^{2+}$ ,  $\text{Fe}^{3+}$ ,  $\text{Zn}^{2+}$ ,  $\text{Mn}^{2+}$  in 3ml MeOH:H<sub>2</sub>O 4:1.

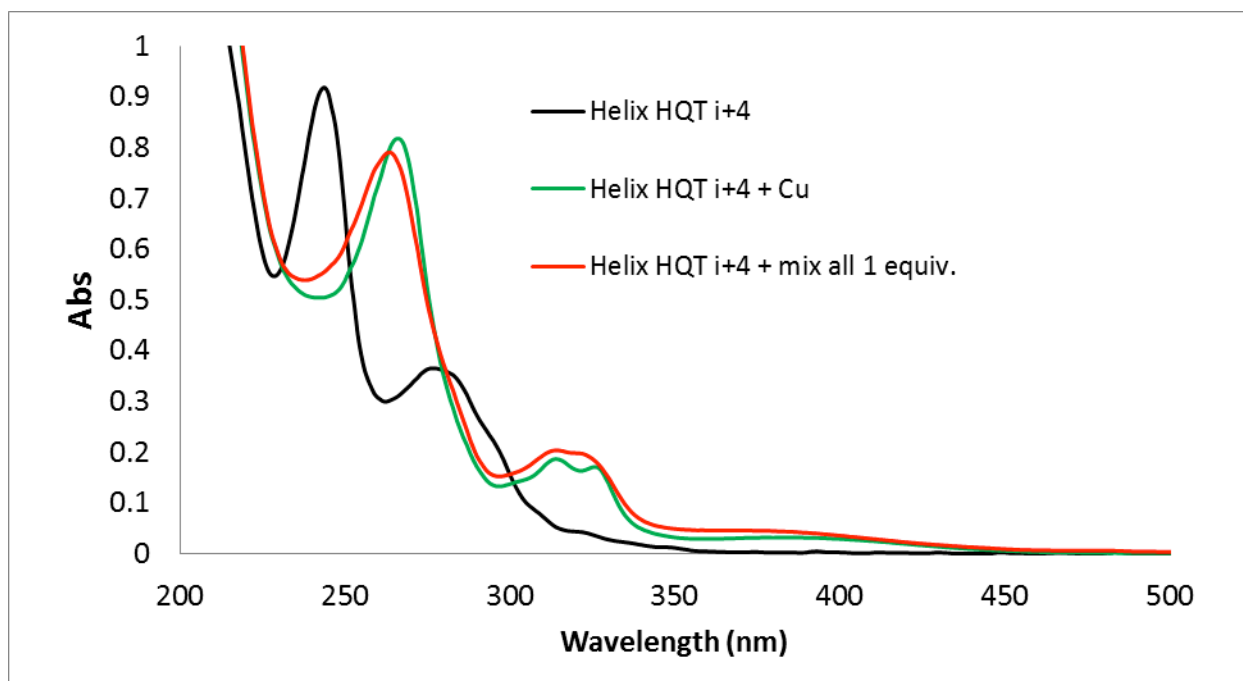

**Figure S23.** UV-Vis of **Helix HQT i+4** (17 μM) with 1 equiv.  $\text{Cu}^{2+}$  and 1 equiv. of  $\text{Cu}^{2+}$ ,  $\text{Co}^{2+}$ ,  $\text{Ni}^{2+}$ ,  $\text{Fe}^{3+}$ ,  $\text{Zn}^{2+}$ ,  $\text{Mn}^{2+}$  in 3ml MeOH:H<sub>2</sub>O 4:1.

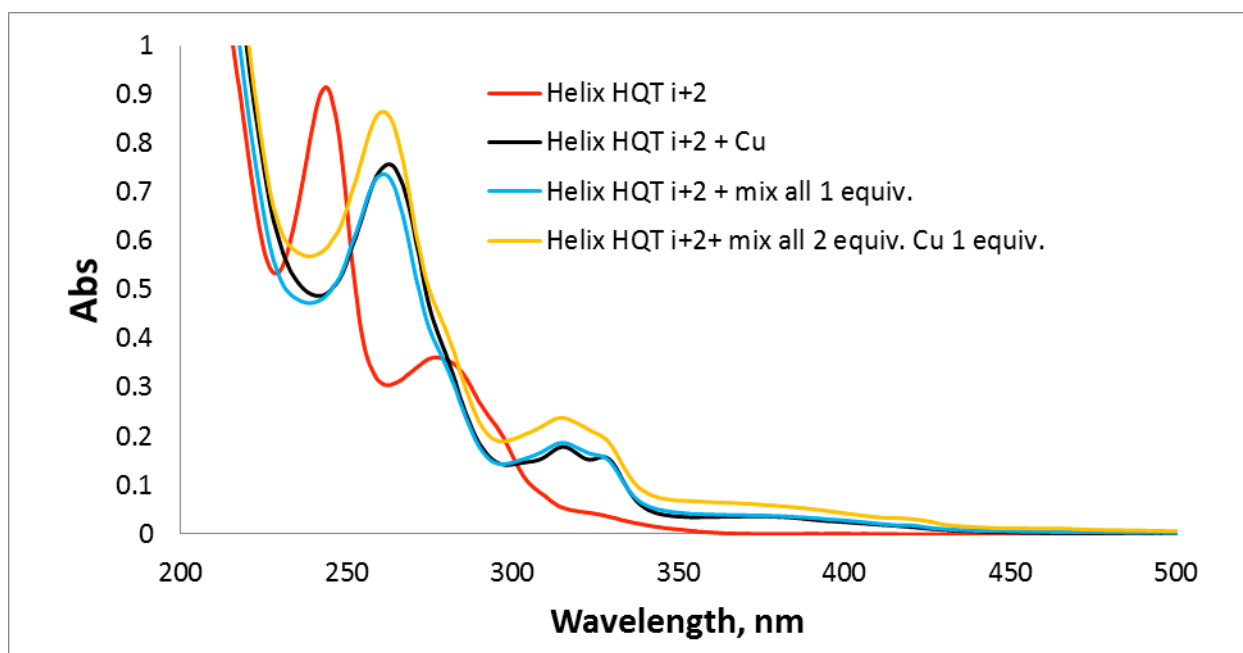

**Figure S24.** UV-Vis of **Helix HQT i+2** (17  $\mu\text{M}$ ) with 1 equiv.  $\text{Cu}^{2+}$  and 1 and 2 equiv. of  $\text{Cu}^{2+}$ ,  $\text{Co}^{2+}$ ,  $\text{Ni}^{2+}$ ,  $\text{Fe}^{3+}$ ,  $\text{Zn}^{2+}$ ,  $\text{Mn}^{2+}$  in 3ml  $\text{MeOH}:\text{H}_2\text{O}$  4:1.

UV-Vis of **Helix HQT i+3** and its metal complexes in ACN

**Table S2.** Absorbance data of peptoid oligomer **Helix HQT i+3** and it metal complexes in ACN.

| ( <b>Helix HQT i+3</b> )M complex | $\lambda_{\text{max}}$ (nm) | Figure # |
|-----------------------------------|-----------------------------|----------|
| $\text{Cu}^{2+}$                  | 263, 316, 329               | S27      |
| $\text{Co}^{2+}$                  | 264, 308                    | S28      |
| $\text{Zn}^{2+}$                  | 268, 311, 323               | S29      |
| $\text{Fe}^{3+}$                  | 253, 315, 560               | S30      |
| $\text{Ni}^{2+}$                  | 270, 312, 325               | S31      |
| $\text{Mn}^{2+}$                  | 263, 312, 323               | S32      |

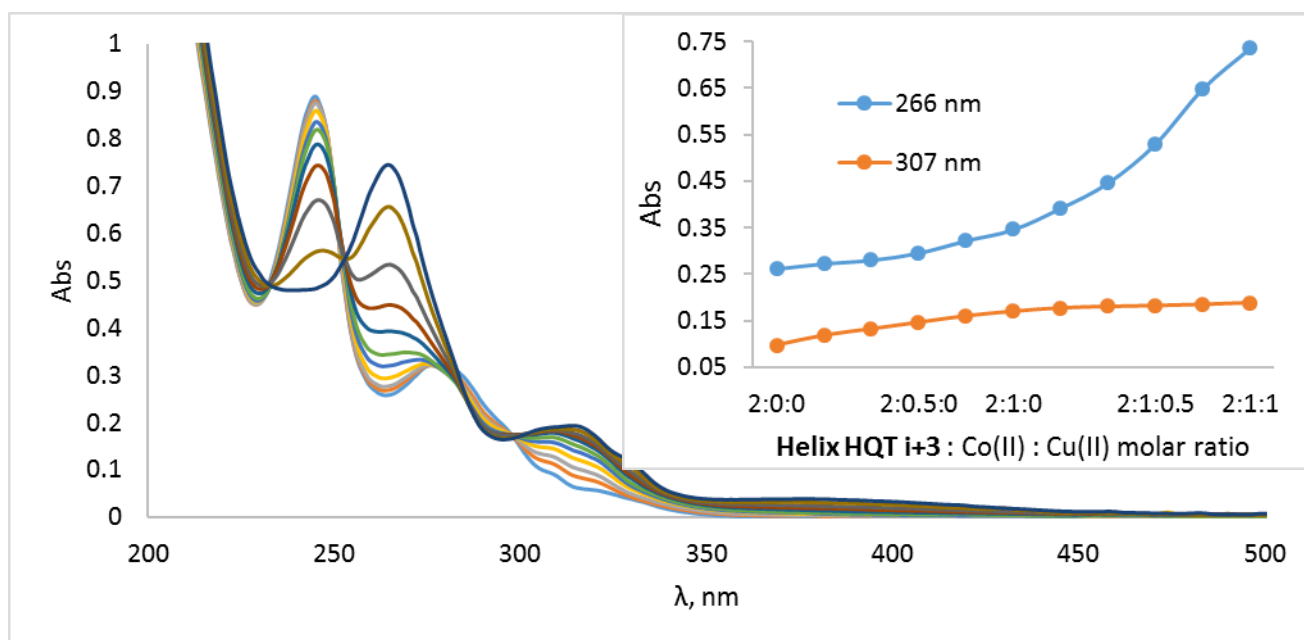

**Figure S25.** UV-Vis Titration and a peptoid-to-metal ratio plot of **Helix HQT i+3** (17 μM) with 0.5 equiv. of Co<sup>2+</sup> (2.5 mM) followed by titration of 0.5 equiv. of Cu<sup>2+</sup> (2.5 mM) in 3mL ACN.

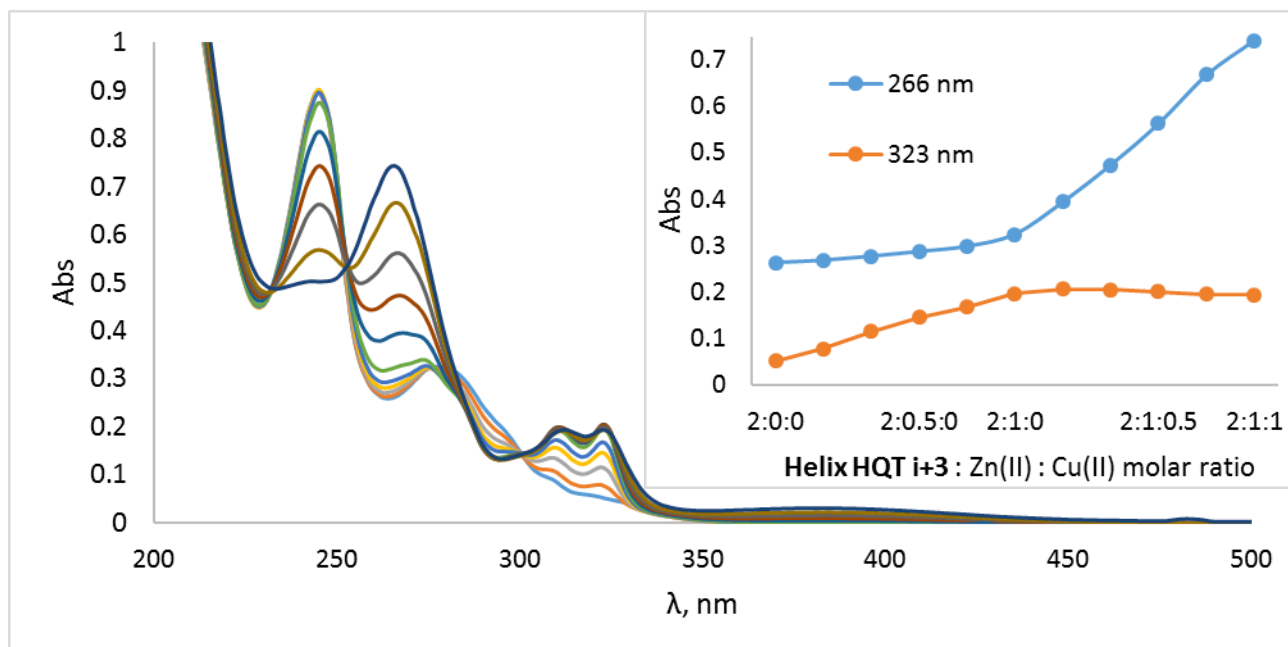

**Figure S26.** UV-Vis Titration and a peptoid-to-metal ratio plot of **Helix HQT i+3** (17 μM) with 0.5 equiv. of Zn<sup>2+</sup> (2.5 mM) followed by titration of 0.5 equiv. of Cu<sup>2+</sup> (2.5mM) in 3 ml ACN.

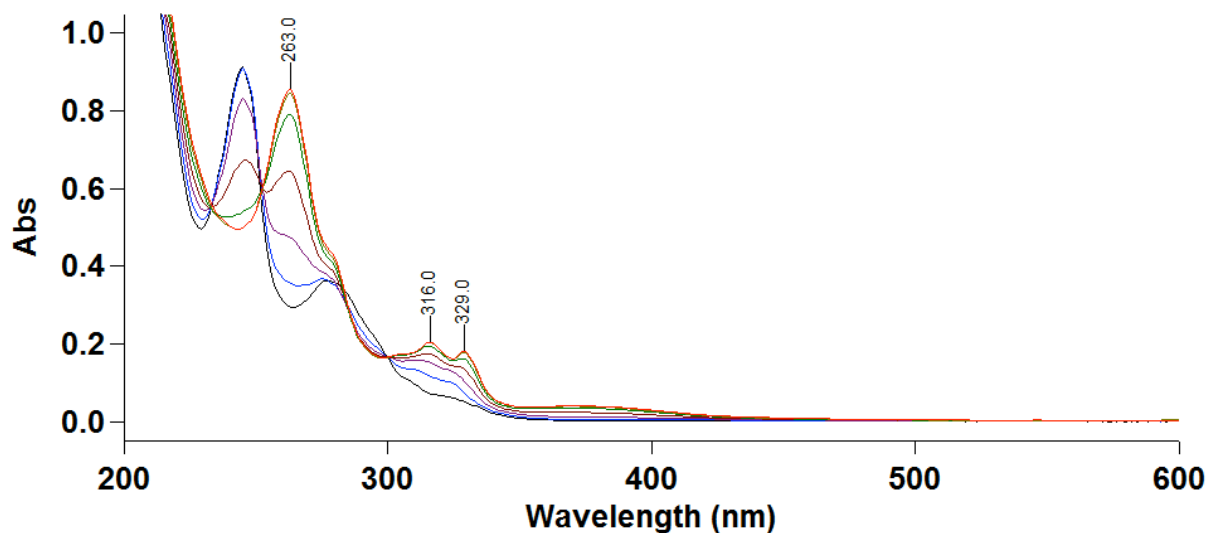

**Figure S27.** UV-Vis titration of **Helix HQT i+3** (17  $\mu\text{M}$ ) with  $\text{Cu}^{2+}$  acetate (5mM) in 3ml ACN.

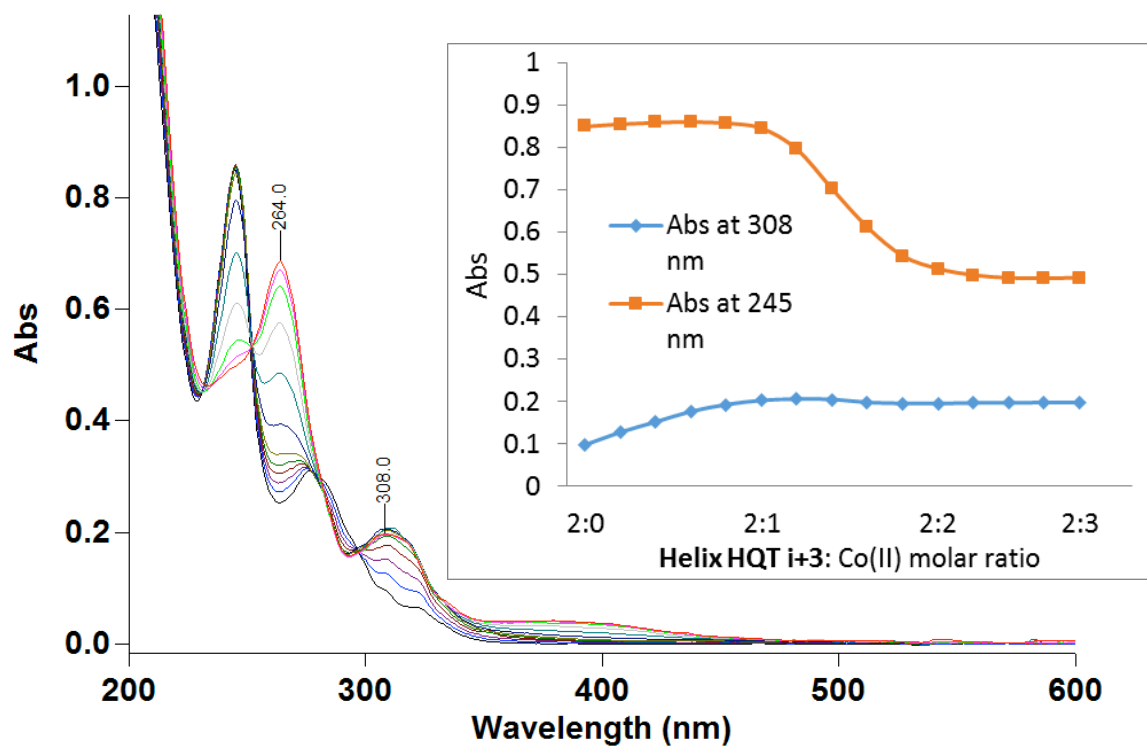

**Figure S28.** UV-Vis titration and a peptoid-to-metal ratio plot of **Helix HQT i+3** (17  $\mu\text{M}$ ) with  $\text{Co}^{2+}$  acetate (2.5mM) in 3ml ACN.

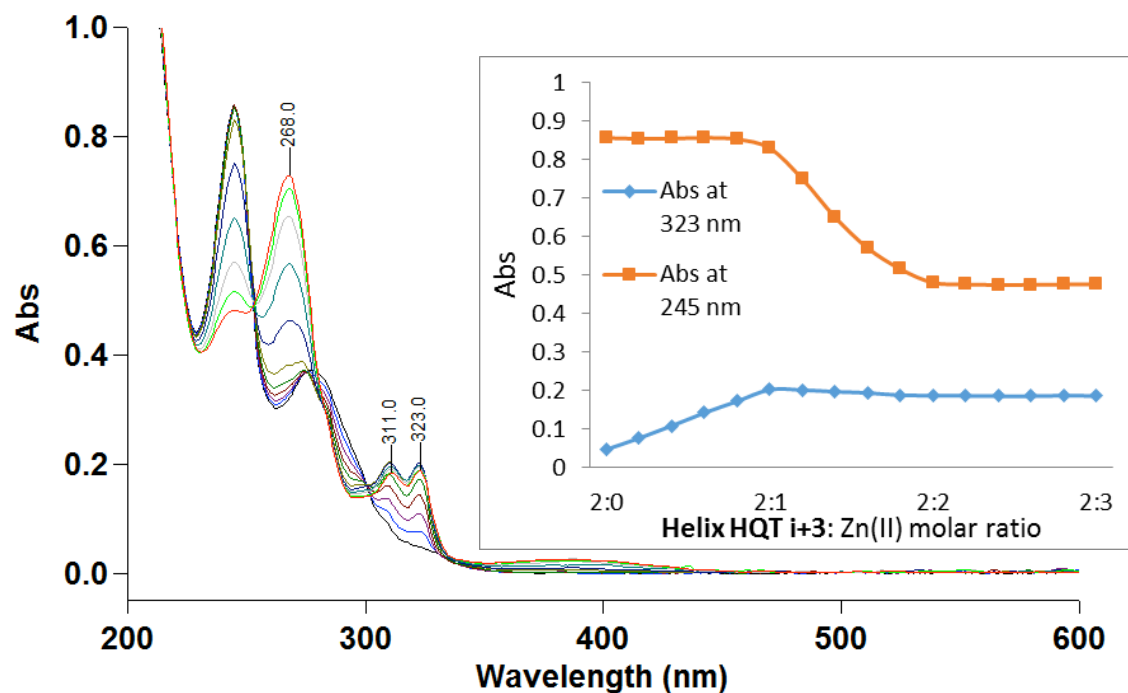

**Figure S29.** UV-Vis titration and a peptoid-to-metal ratio plot of **Helix HQT i+3** (17  $\mu$ M) with Zn<sup>2+</sup> acetate (2.5mM) in 3ml ACN.

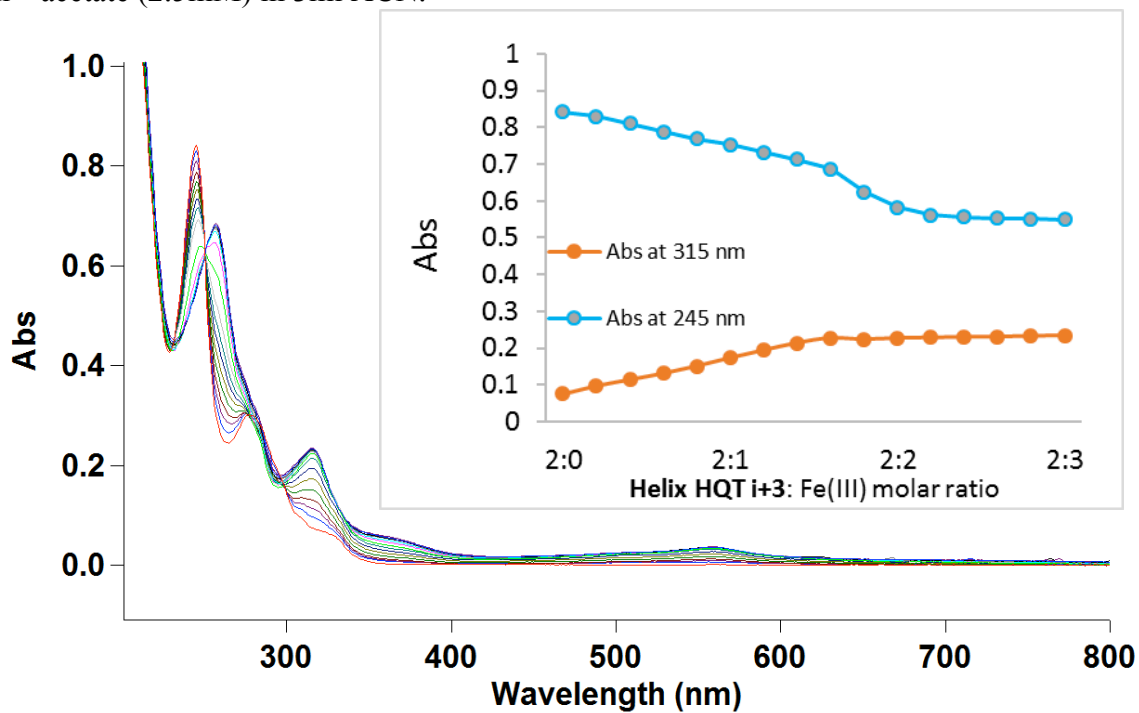

**Figure S30.** UV-Vis titration and a peptoid-to-metal ratio plot of **Helix HQT i+3** (17  $\mu$ M) with Fe<sup>3+</sup> perchlorate (2.5mM) in 3ml ACN.

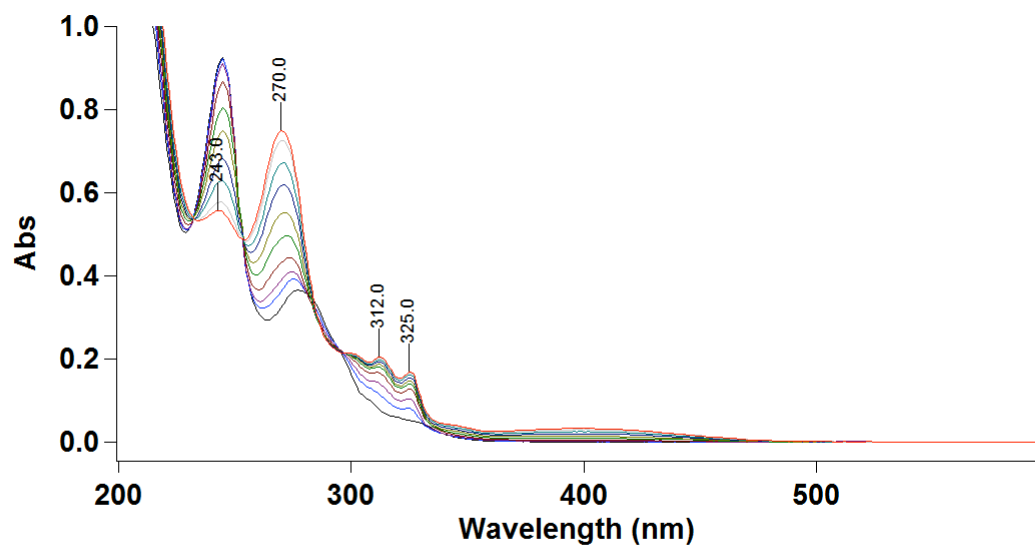

**Figure S31.** UV-Vis titration of **Helix HQT i+3** (17  $\mu$ M) with  $\text{Ni}^{2+}$  acetate (2.5mM) in 3ml ACN.

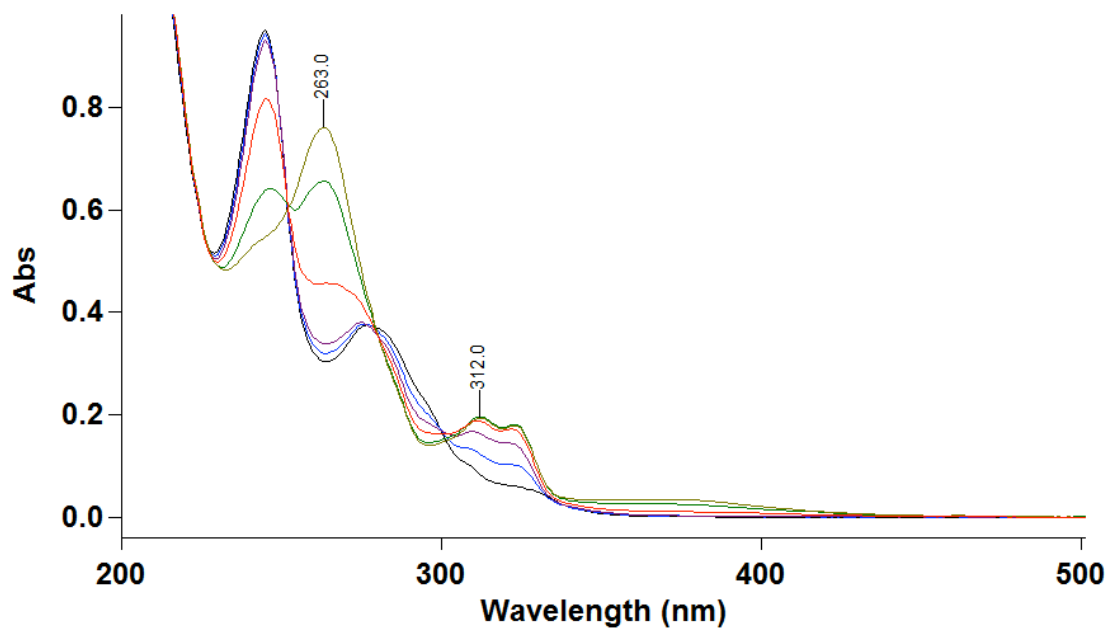

**Figure S32.** UV-Vis titration of **Helix HQT i+3** (17  $\mu$ M) with  $\text{Mn}^{2+}$  acetate (5mM) in 3ml ACN.

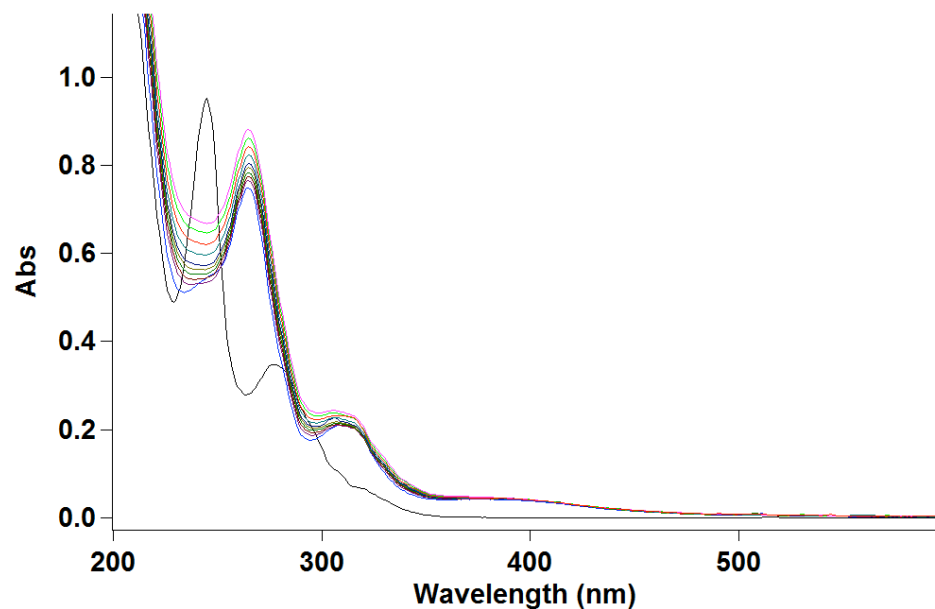

**Figure S33.** UV-Vis of free peptoid **Helix HQT i+3** (black, 17  $\mu\text{M}$ ), formation of **(Helix HQT i+3)<sub>2</sub>CoCu** (blue) followed by titration with  $\text{Cu}^{+2}$  (2.5mM) in 3ml ACN.

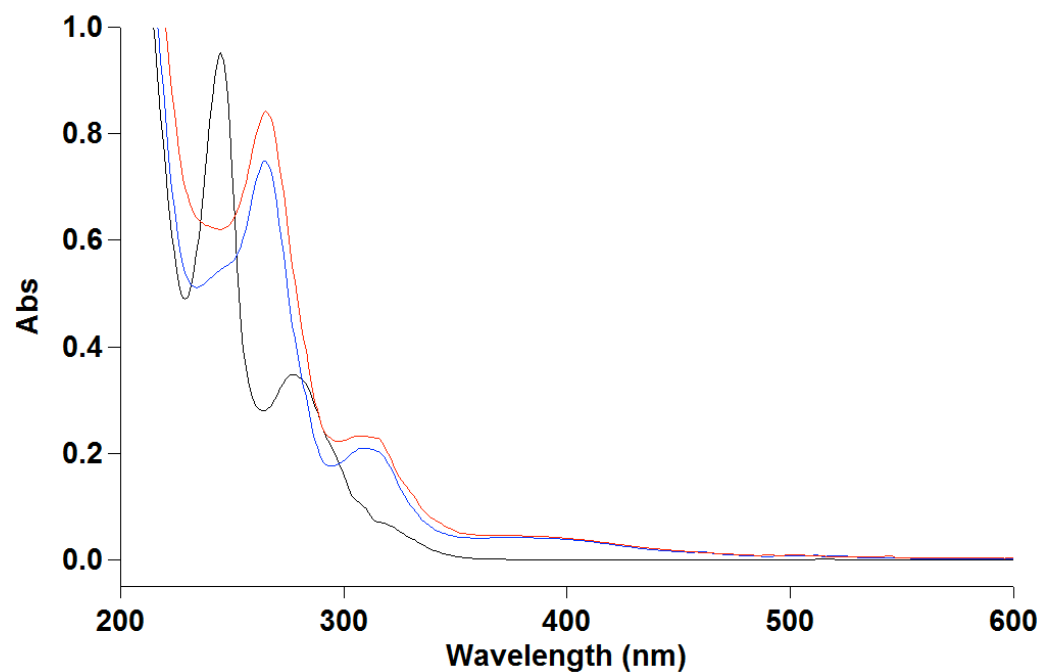

**Figure S34.** UV-Vis of **Helix HQT i+3** (black, 17  $\mu\text{M}$ ), **(Helix HQT i+3)<sub>2</sub>CoCu** (blue) followed by addition of 2 equiv. of  $\text{Cu}^{+2}$  (red) in ACN.

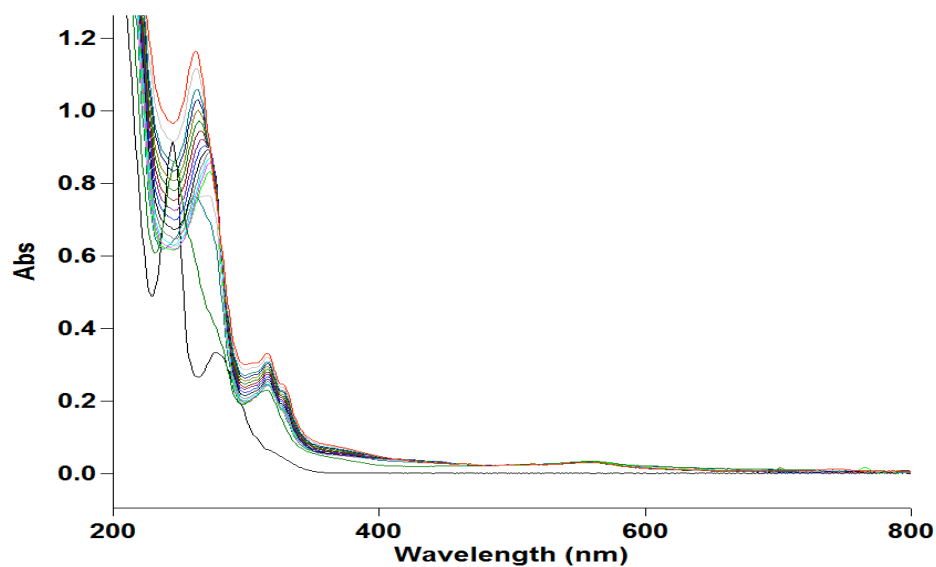

**Figure S35.** UV-Vis of free peptoid **Helix HQT i+3** (black, 17  $\mu$ M), formation of **(Helix HQT i+3)<sub>2</sub>FeCu** (blue) followed by titration with  $\text{Cu}^{+2}$  (2.5 mM) in 3 ml ACN.

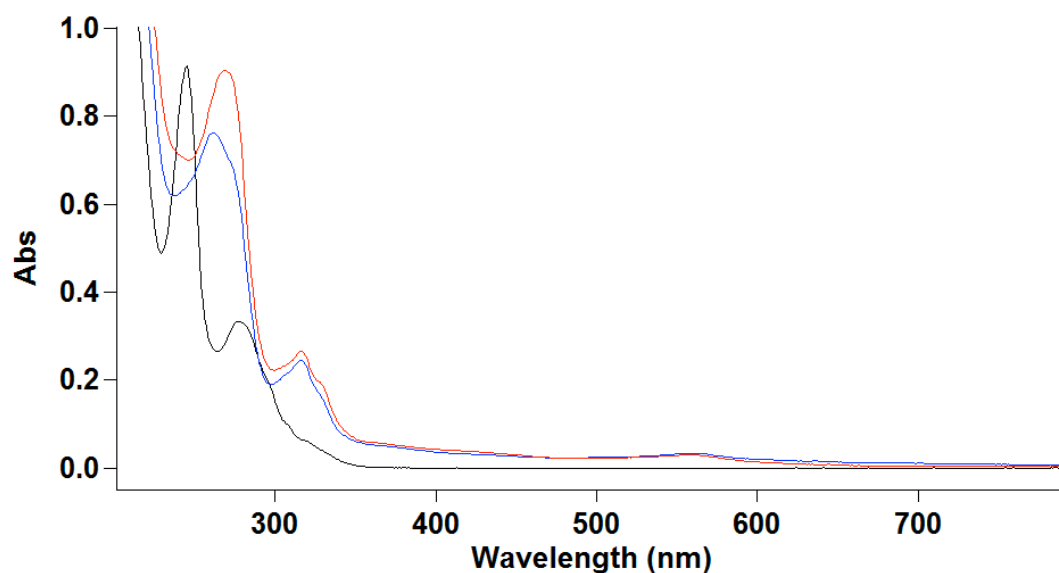

**Figure S36.** UV-Vis of **Helix HQT i+3** (black, 17  $\mu$ M), **(Helix HQT i+3)<sub>2</sub>FeCu** (blue line) followed by addition of 3 equiv. of  $\text{Cu}^{+2}$  (red) in 3 ml ACN.

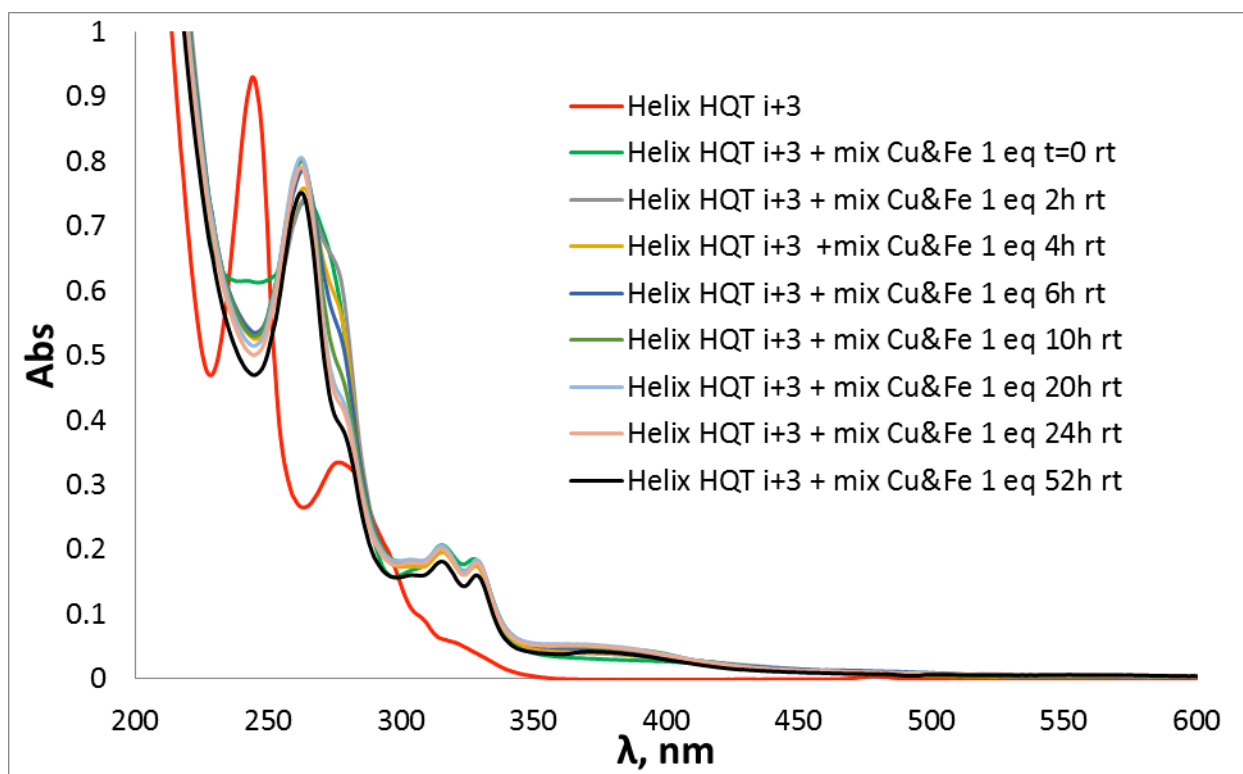

**Figure S37.** UV-Vis of **Helix HQT i+3** (17  $\mu\text{M}$ ) with mixture of 1 equiv.  $\text{Cu}^{2+}$  and  $\text{Fe}^{3+}$  in ACN at room temperature at different time points.

#### UV-Vis of control peptides in ACN

**Table S3.** UV-Vis absorbance data of control peptide oligomers and their metal complexes in ACN.

| peptoid                  | Cu                         | Co                    | Zn                         | mix Cu&Co             | mix Cu&Zn                  |
|--------------------------|----------------------------|-----------------------|----------------------------|-----------------------|----------------------------|
| <b>Non helix HQT i+3</b> | 263, 316, 329<br>(Fig S38) | 264, 30<br>(Fig S39)  | 268, 311, 323<br>(Fig S40) | 262, 309<br>(Fig S41) | 264, 314<br>(Fig S42)      |
| <b>DI HQT</b>            | 263, 315, 328<br>(Fig S43) | 264, 307<br>(Fig S44) | 367, 311, 322<br>(Fig S45) | 263, 315<br>(Fig S46) | 264, 313<br>(Fig S47)      |
| <b>Helix HQT i+2</b>     | 264, 314<br>(Fig S48)      | 266, 310<br>(Fig S49) | 268, 310, 321<br>(Fig S50) | 265, 311<br>(Fig S51) | 267, 310<br>(Fig S52)      |
| <b>Helix HQT i+4</b>     | 265, 316<br>(Fig S53)      | 266, 314<br>(Fig S54) | 267, 309, 321<br>(Fig S55) | 265, 310<br>(Fig S56) | 267, 310, 321<br>(Fig S57) |

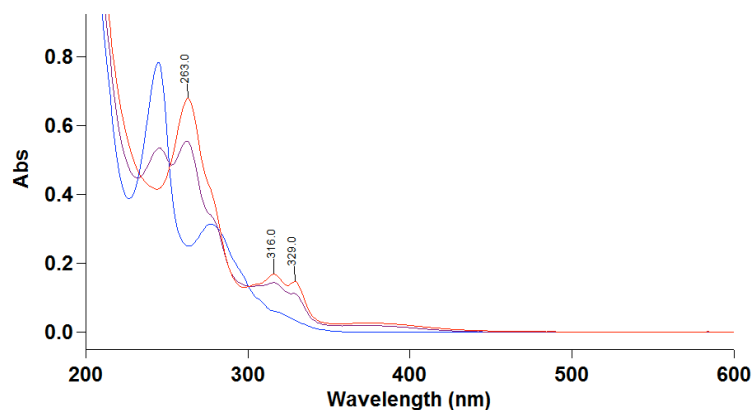

**Figure S38.** UV-Vis of **Nonhelix HQT i+3** (blue, 17  $\mu\text{M}$ ) in ACN with 0.5 (purple) and 1 equiv. of  $\text{Cu}^{2+}$  (red).

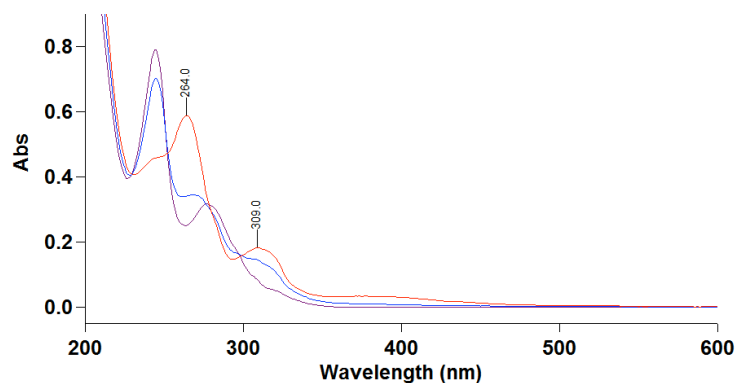

**Figure S39.** UV-Vis of **Nonhelix HQT i+3** (purple, 17  $\mu\text{M}$ ) in ACN with 0.5 (blue) and 1.5 equiv. of  $\text{Co}^{2+}$  (red).

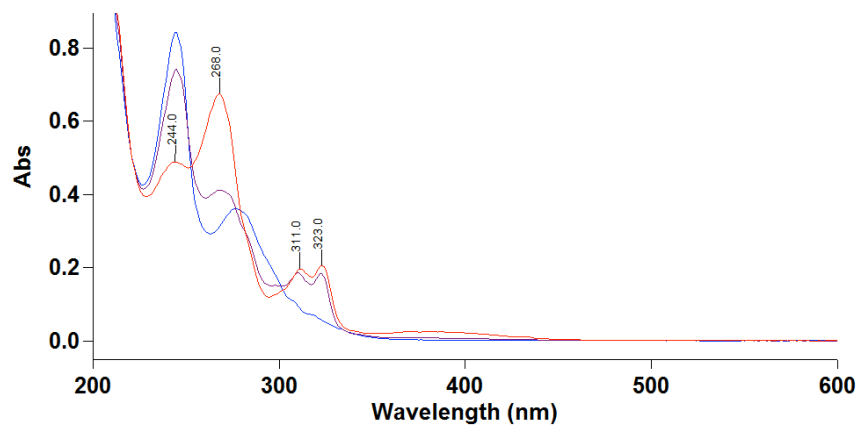

**Figure S40.** UV-Vis of **Nonhelix HQT i+3** (blue, 17  $\mu\text{M}$ ) in ACN with 0.5 (purple) and 1 equiv. of  $\text{Zn}^{2+}$  (red).

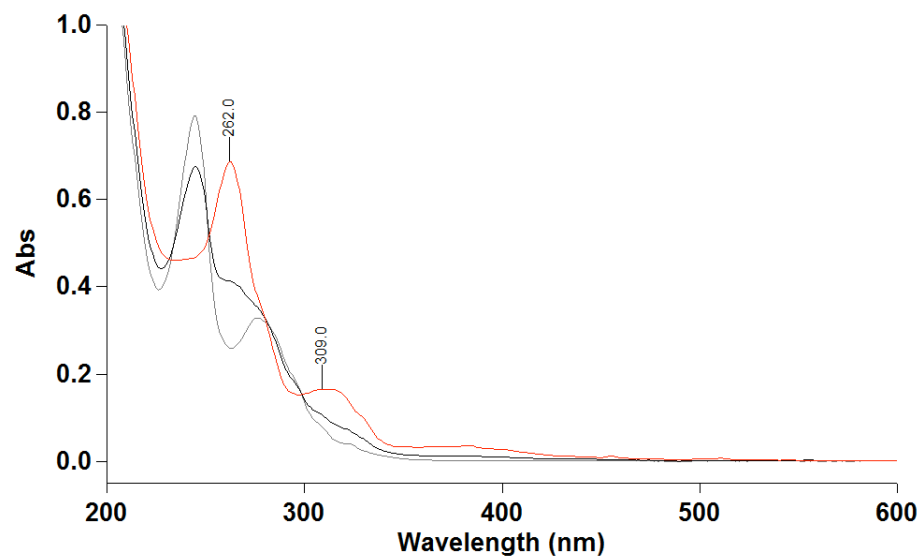

**Figure S41.** UV-Vis of free **NonHelix HQT i+3** (gray, 17 μM) with 0.5 equiv. mix of Cu<sup>2+</sup> and Co<sup>2+</sup> (black) and 1equiv. mix of Cu<sup>2+</sup> and Co<sup>2+</sup> (red) in ACN.

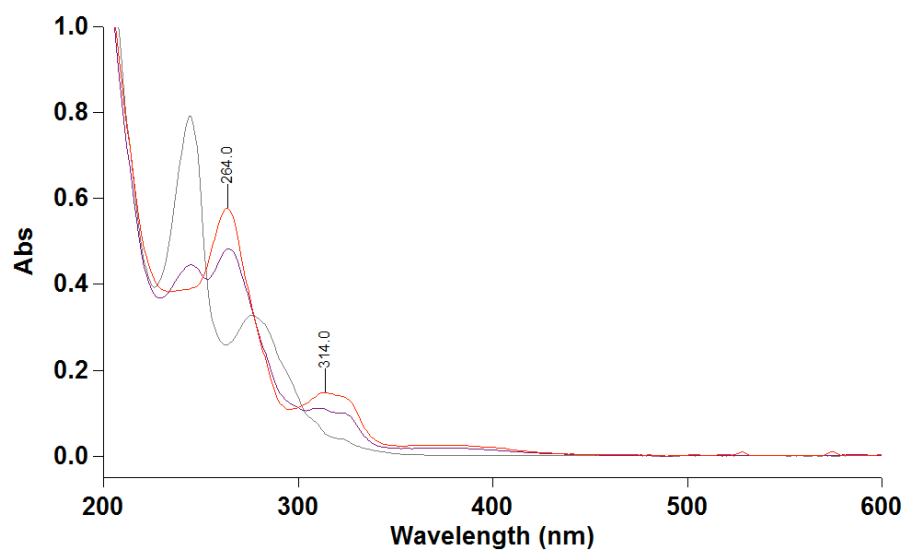

**Figure S42.** UV-Vis of free **NonHelix HQT i+3** (gray, 17 μM) with 0.5 equiv. mix of Cu<sup>2+</sup> and Zn<sup>2+</sup> (purple) and 1 equiv. mix of Cu<sup>2+</sup> and Zn<sup>2+</sup> (red) in ACN.

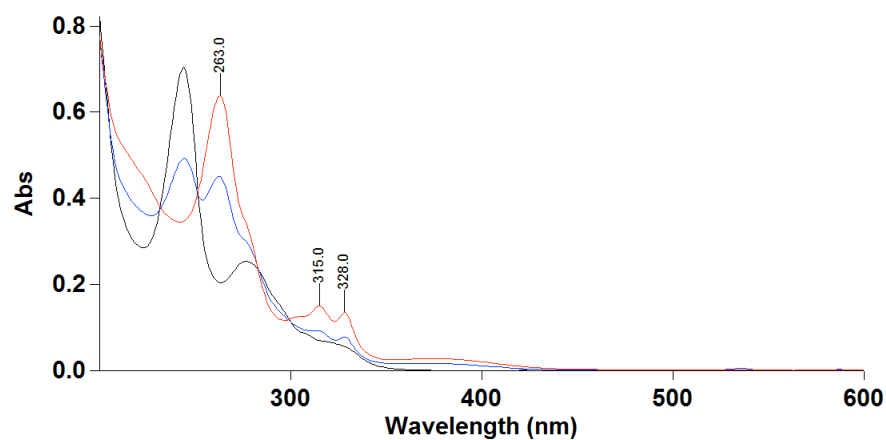

**Figure S43.** UV-Vis of **DI HQT** (black, 17  $\mu\text{M}$ ) in ACN with 0.5 (blue) and 1 equiv. of  $\text{Cu}^{2+}$  (red).

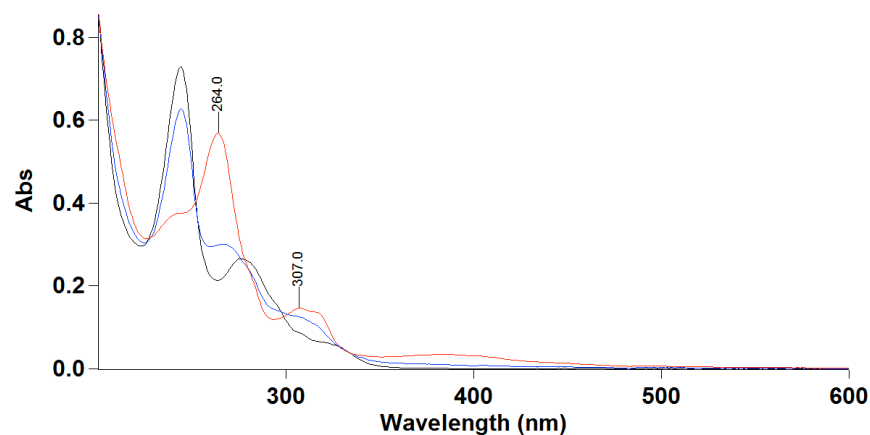

**Figure S44.** UV-Vis of **DI HQT** (black, 17  $\mu\text{M}$ ) in ACN with 0.5 (blue) and 1.5 equiv. of  $\text{Co}^{2+}$  (red).

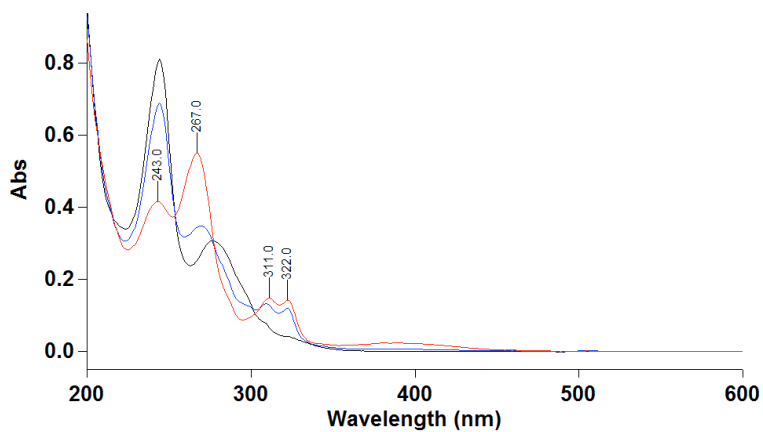

**Figure S45.** UV-Vis of **DI HQT** (black, 17  $\mu\text{M}$ ) in ACN with 0.5 (blue) and 1.5 equiv. of  $\text{Zn}^{2+}$  (red).

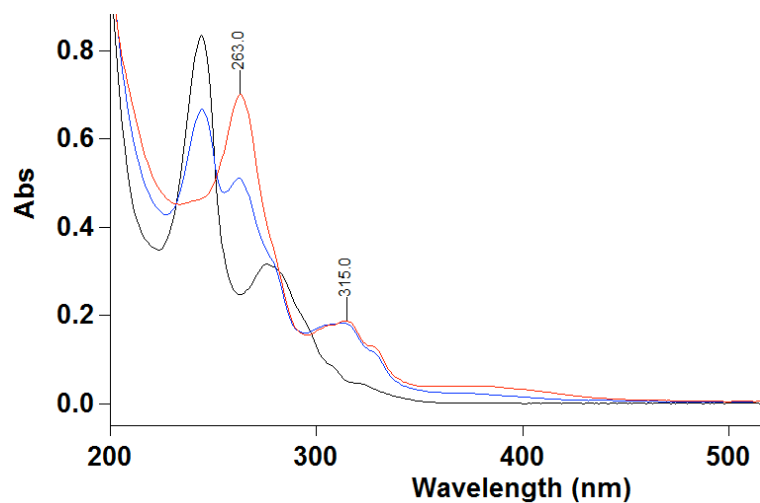

**Figure S46.** UV-Vis of free **DI HQT** (black, 17 μM) with 0.5 equiv. mix of Cu<sup>2+</sup> and Co<sup>2+</sup> (blue) and 1 mix of Cu<sup>2+</sup> and Co<sup>2+</sup> (red) in ACN.

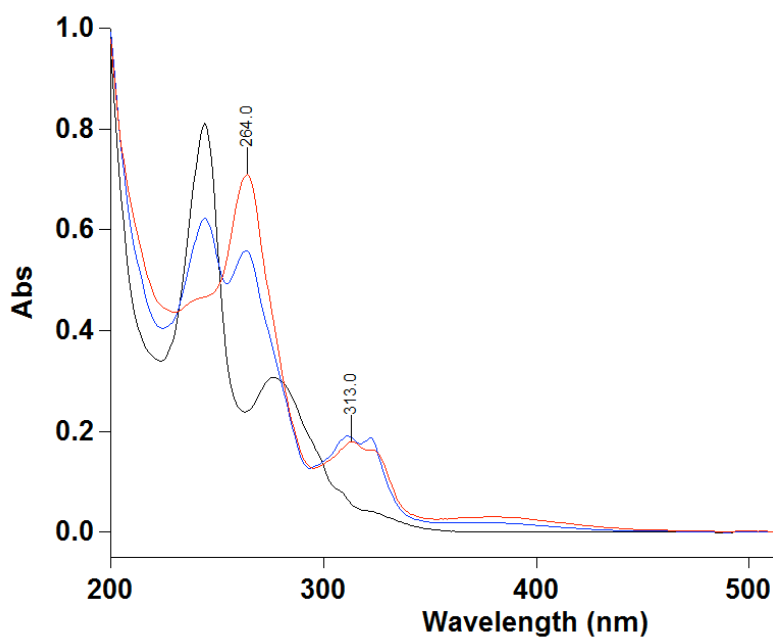

**Figure S47.** UV-Vis of free **DI HQT** (black, 17 μM) with 0.5 equiv. mix of Cu<sup>2+</sup> and Zn<sup>2+</sup> (blue) and 1 equiv. mix of Cu<sup>2+</sup> and Zn<sup>2+</sup> (red) in ACN.

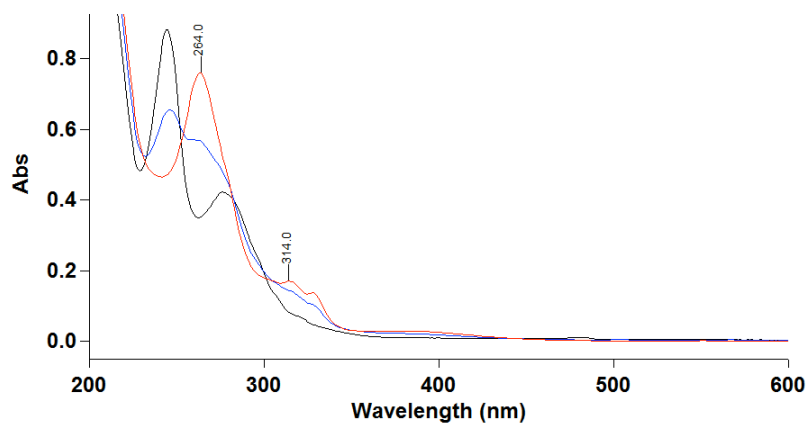

**Figure S48.** UV-Vis of **Helix HQT i+2** (black, 17  $\mu\text{M}$ ) in ACN with 0.5 (blue) and 1 equiv. of  $\text{Cu}^{2+}$  (red).

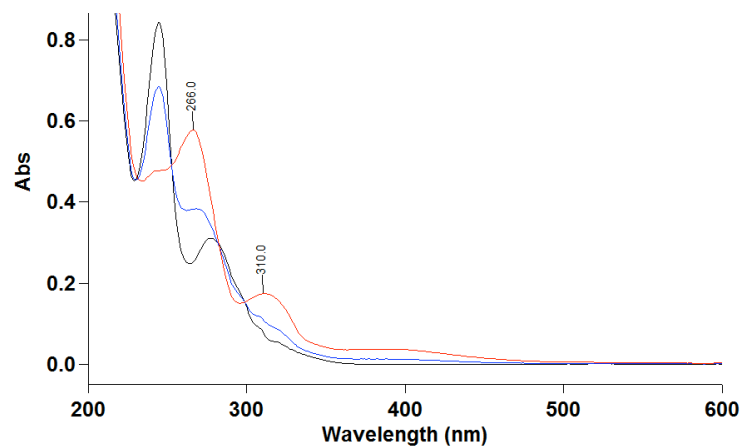

**Figure S49.** UV-Vis of **Helix HQT i+2** (black, 17  $\mu\text{M}$ ) in ACN with 0.5 (blue) and 1.5 equiv. of  $\text{Co}^{2+}$  (red).

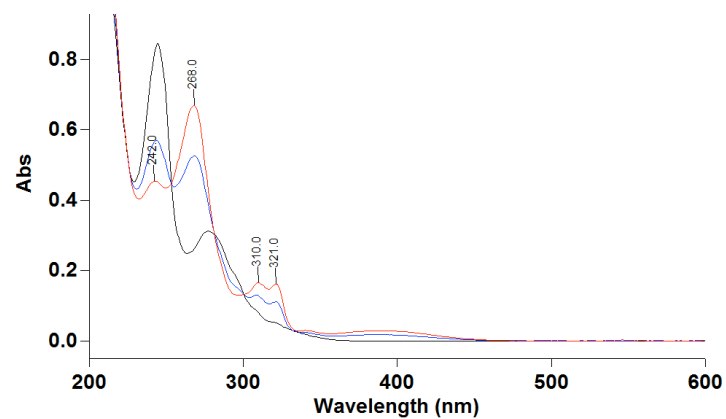

**Figure S50.** UV-Vis of **Helix HQT i+2** (black, 17  $\mu\text{M}$ ) in ACN with 0.5 (blue) and 1 equiv. of  $\text{Zn}^{2+}$  (red).

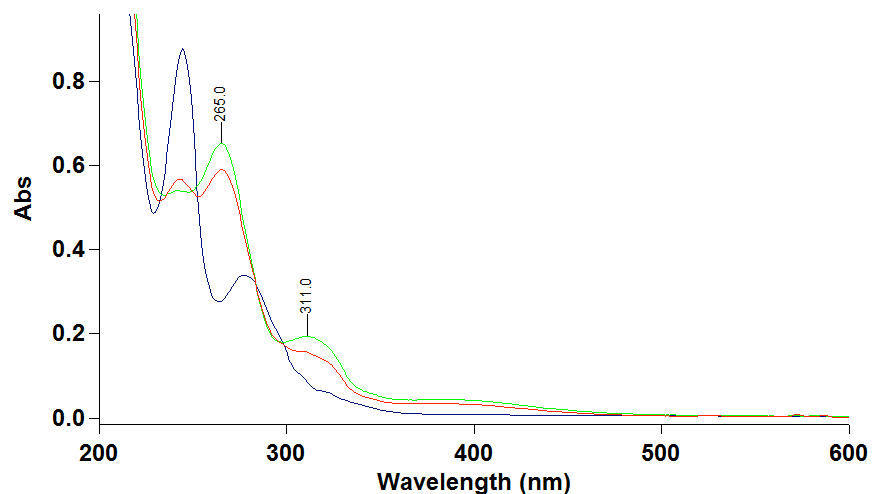

**Figure S51.** UV-Vis of free **Helix HQT i+2** (blue, 17 μM) with 0.5 equiv. mix of Cu<sup>2+</sup> and Co<sup>2+</sup> (red) and 1equiv. mix of Cu<sup>2+</sup> and Co<sup>2+</sup> (green) in ACN.

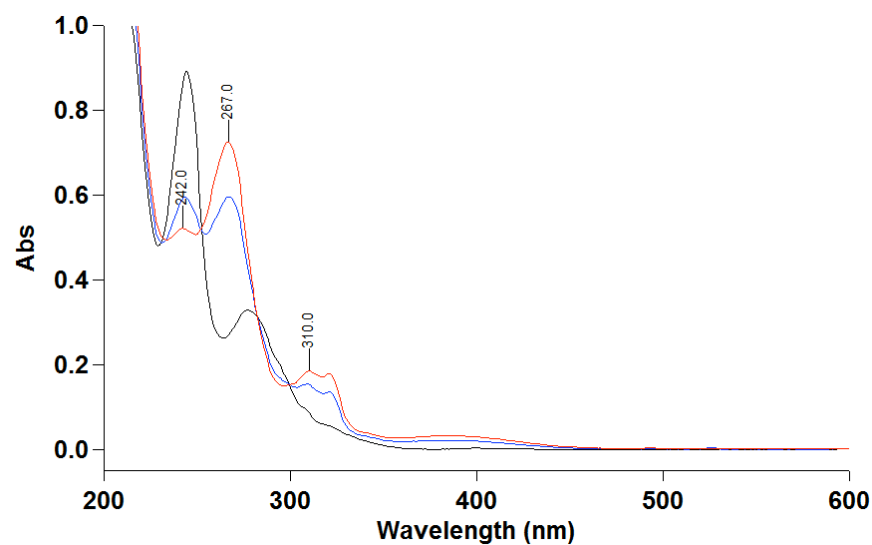

**Figure S52.** UV-Vis of free **Helix HQT i+2** (black, 17 μM) with 0.5 equiv. mix of Cu<sup>2+</sup> and Zn<sup>2+</sup> (blue) and 1 equiv. mix of Cu<sup>2+</sup> and Zn<sup>2+</sup> (red) in ACN.

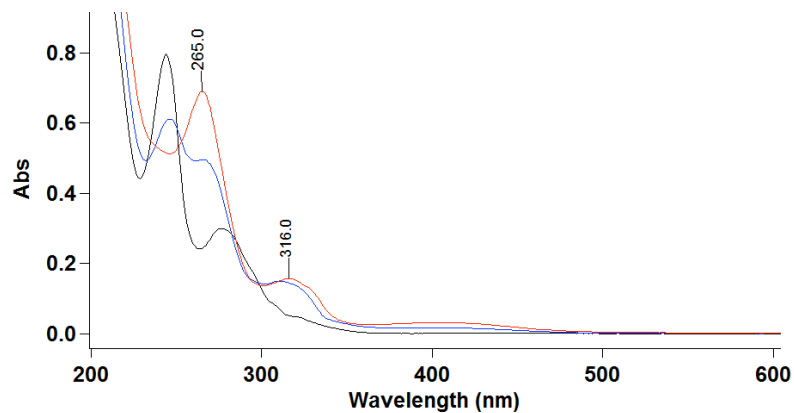

**Figure S53.** UV-Vis of **Helix HQT i+4** (black, 17 μM) in ACN with 0.5 (blue) and 1 equiv. of Cu<sup>2+</sup> (red).

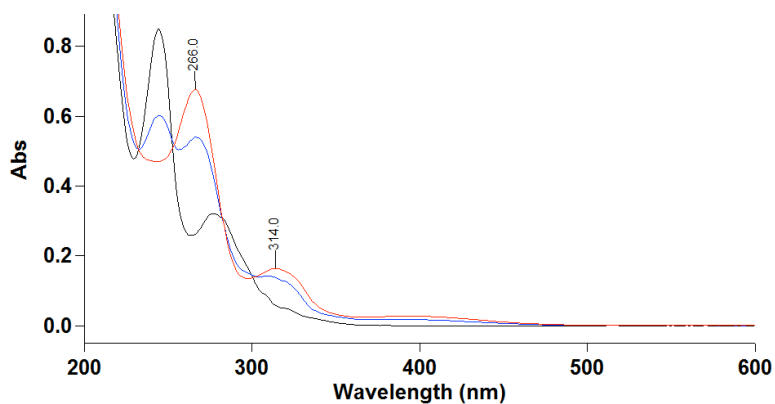

**Figure S54.** UV-Vis of **Helix HQT i+4** (black, 17 μM) in ACN with 0.5 (blue) and 1 equiv. of Co<sup>2+</sup> (red).

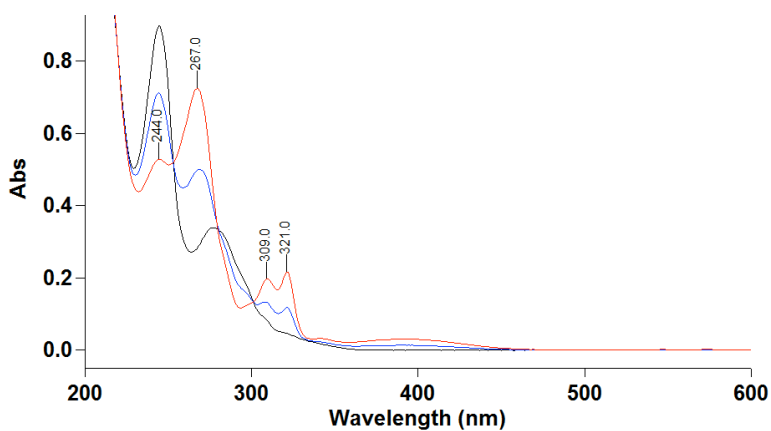

**Figure S55.** UV-Vis of **Helix HQT i+4** (black, 17 μM) in ACN with 0.5 (blue) and 1 equiv. of Zn<sup>2+</sup> (red).

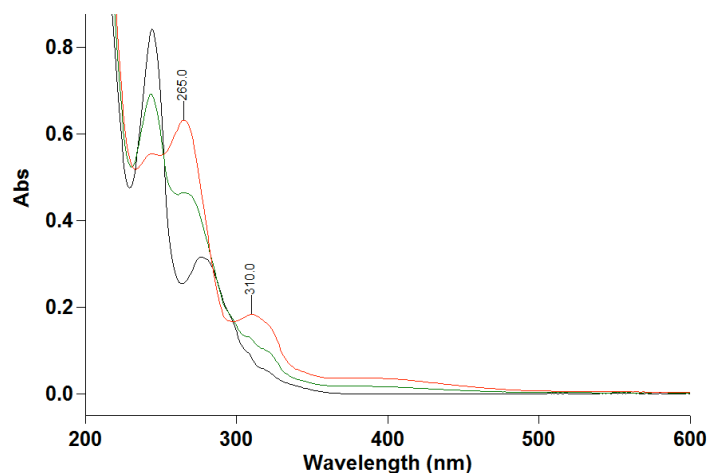

**Figure S56.** UV-Vis of free **Helix HQT i+4** (black, 17  $\mu$ M) with 0.5 equiv. mix of  $\text{Cu}^{2+}$  and  $\text{Co}^{2+}$  (green) and 1 equiv. mix of  $\text{Cu}^{2+}$  and  $\text{Co}^{2+}$  (red) in ACN.

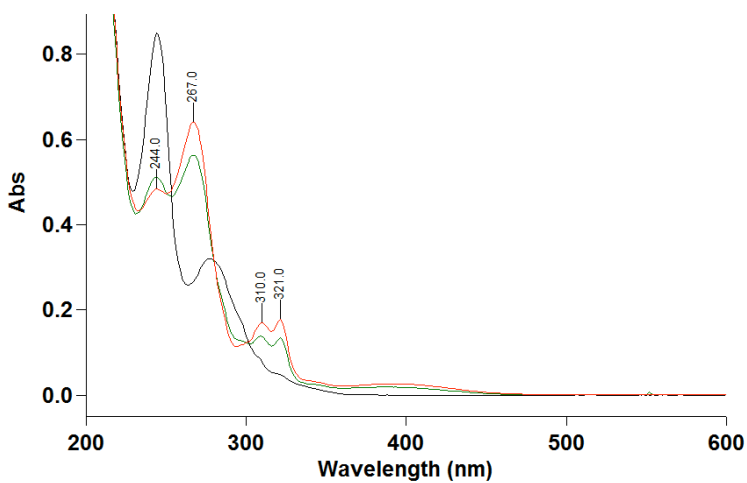

**Figure S57.** UV-Vis of free **Helix HQT i+4** (black, 17  $\mu$ M) with 0.5 equiv. mix of  $\text{Cu}^{2+}$  and  $\text{Zn}^{2+}$  (green) and 1 equiv. mix of  $\text{Cu}^{2+}$  and  $\text{Zn}^{2+}$  (red) in 3ml ACN.

### Association constants

**Table S4.** The association constants for metal binding were obtained by fitting the UV titrations results to the equation below using a nonlinear regression (curve fit) GraphPad Prism® software. Where  $A_0$  and  $A_{\text{max}}$  are the minimum and maximum absorbance measured for the free ligand respectively,  $L_0$  is the initial concentration of the free ligand (typically 7  $\mu$ M) and  $M$  is the concentration of metal ions that was added (0-290  $\mu$ M).

$$A = A_0 + \frac{1}{2[L_0]}(A_{\max} - A_0) \times \left[ \left( [L_0] + [M] + \frac{1}{K} \right) \pm \sqrt{\left( [L_0] + [M] + \frac{1}{K} \right)^2 - 4[L_0][M]} \right]$$

| (Peptoid)M           | A <sub>0</sub> , A <sub>max</sub> | Binding constant K [M <sup>-1</sup> ] | R square |
|----------------------|-----------------------------------|---------------------------------------|----------|
| (Helix HQT i+3)Cu    | 0.426, 0.303                      | (1.03 ± 0.49)x10 <sup>13</sup>        | 0.9986   |
| (Helix HQT i+3)Zn    | 0.378, 0.187                      | (3.60 ± 0.46)x10 <sup>11</sup>        | 0.9938   |
| (Helix HQT i+3)Co    | 0.350, 0.176                      | (2.53 ± 0.35)x10 <sup>11</sup>        | 0.9916   |
| (Helix HQT i+3)Ni    | 0.373, 0.149                      | (1.52 ± 0.09)x10 <sup>10</sup>        | 0.9971   |
| (Helix HQT i+3)Mn    | 0.362, 0.162                      | (1.13 ± 0.06)x10 <sup>10</sup>        | 0.9981   |
| (DI HQT)Cu           | 0.292, 0.136                      | (1.36±0.66)x10 <sup>12</sup>          | 0.9773   |
| (DI HQT)Zn           | 0.330, 0.184                      | (1.28±0.49)x10 <sup>12</sup>          | 0.9806   |
| (DI HQT)Co           | 0.324, 0.226                      | (5.15±0.76)x10 <sup>11</sup>          | 0.9984   |
| (DI HQT)Ni           | 0.333, 0.174                      | (1.33 ± 0.18)x10 <sup>9</sup>         | 0.9916   |
| (DI HQT)Mn           | 0.316, 0.214                      | (1.04 ± 0.28)x10 <sup>9</sup>         | 0.9742   |
| (Nonhelix HQT i+3)Cu | 0.398, 0.297                      | (1.16±0.53)x10 <sup>12</sup>          | 0.9874   |
| (Nonhelix HQT i+3)Zn | 0.312, 0.193                      | (1.07±0.68)x10 <sup>12</sup>          | 0.9467   |
| (Nonhelix HQT i+3)Co | 0.305, 0.175                      | (1.69±0.56)x10 <sup>12</sup>          | 0.9895   |
| (Nonhelix HQT i+3)Ni | 0.316, 0.154                      | (6.03 ± 0.69)x10 <sup>10</sup>        | 0.9892   |
| (Nonhelix HQT i+3)Mn | 0.316, 0.203                      | (2.65 ± 0.28)x10 <sup>10</sup>        | 0.9952   |
| (Helix HQT i+4)Cu    | 0.321, 0.248                      | (4.12±0.84)x10 <sup>11</sup>          | 0.9939   |
| (Helix HQT i+4)Zn    | 0.375, 0.261                      | (1.04±0.17)x10 <sup>11</sup>          | 0.9878   |

|                      |              |                                  |        |
|----------------------|--------------|----------------------------------|--------|
| (Helix HQT i+4)Co    | 0.298, 0.224 | $(1.40 \pm 0.39) \times 10^{11}$ | 0.9803 |
| (Helix HQT i+4)Ni    | 0.316, 0.199 | $(2.67 \pm 0.75) \times 10^{10}$ | 0.9551 |
| (Helix HQT i+4 )Mn   | 0.293, 0.171 | $(8.13 \pm 1.77) \times 10^{10}$ | 0.9629 |
| (Helix HQT i+2)Cu    | 0.373, 0.221 | $(1.50 \pm 0.37) \times 10^{12}$ | 0.9933 |
| (Helix HQT i+2)Zn    | 0.379, 0.278 | $(1.00 \pm 0.37) \times 10^{12}$ | 0.9823 |
| (Helix HQT i+2)Co    | 0.366, 0.228 | $(6.01 \pm 2.23) \times 10^{11}$ | 0.9815 |
| (Helix HQT i+2)Ni    | 0.363, 0.247 | $(1.15 \pm 0.39) \times 10^{10}$ | 0.9681 |
| (Helix HQT i+2)Mn    | 0.381, 0.221 | $(5.37 \pm 0.64) \times 10^{10}$ | 0.9913 |
| (H <sub>2</sub> 6)Cu | 0.319, 0.119 | $(1.43 \pm 0.46) \times 10^{12}$ | 0.9896 |

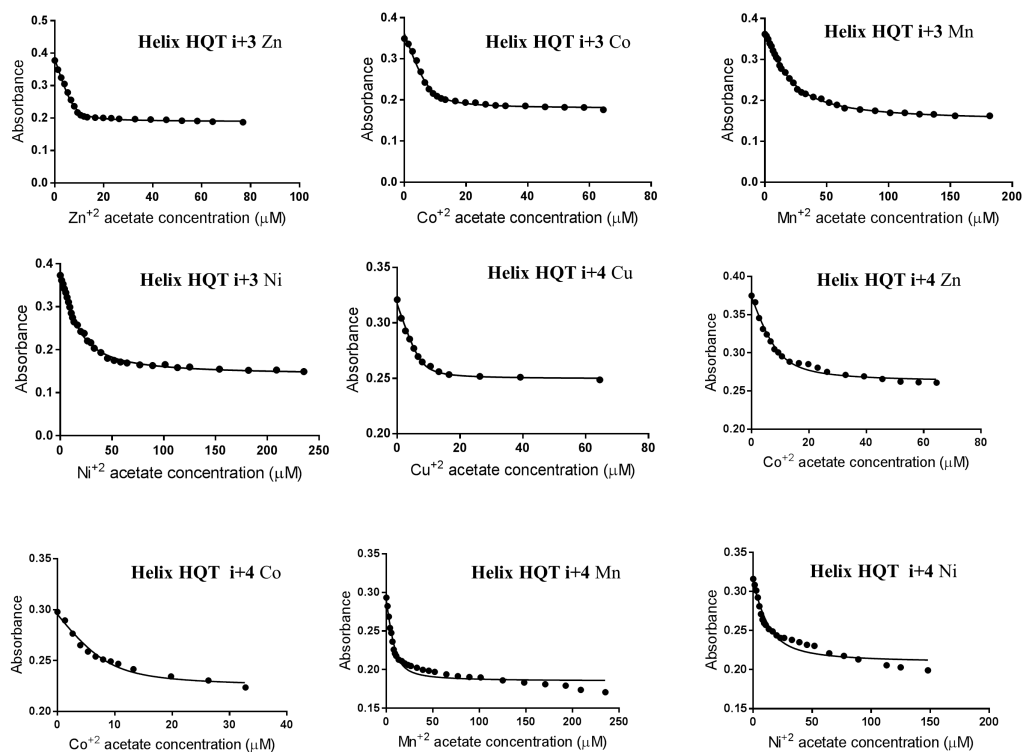

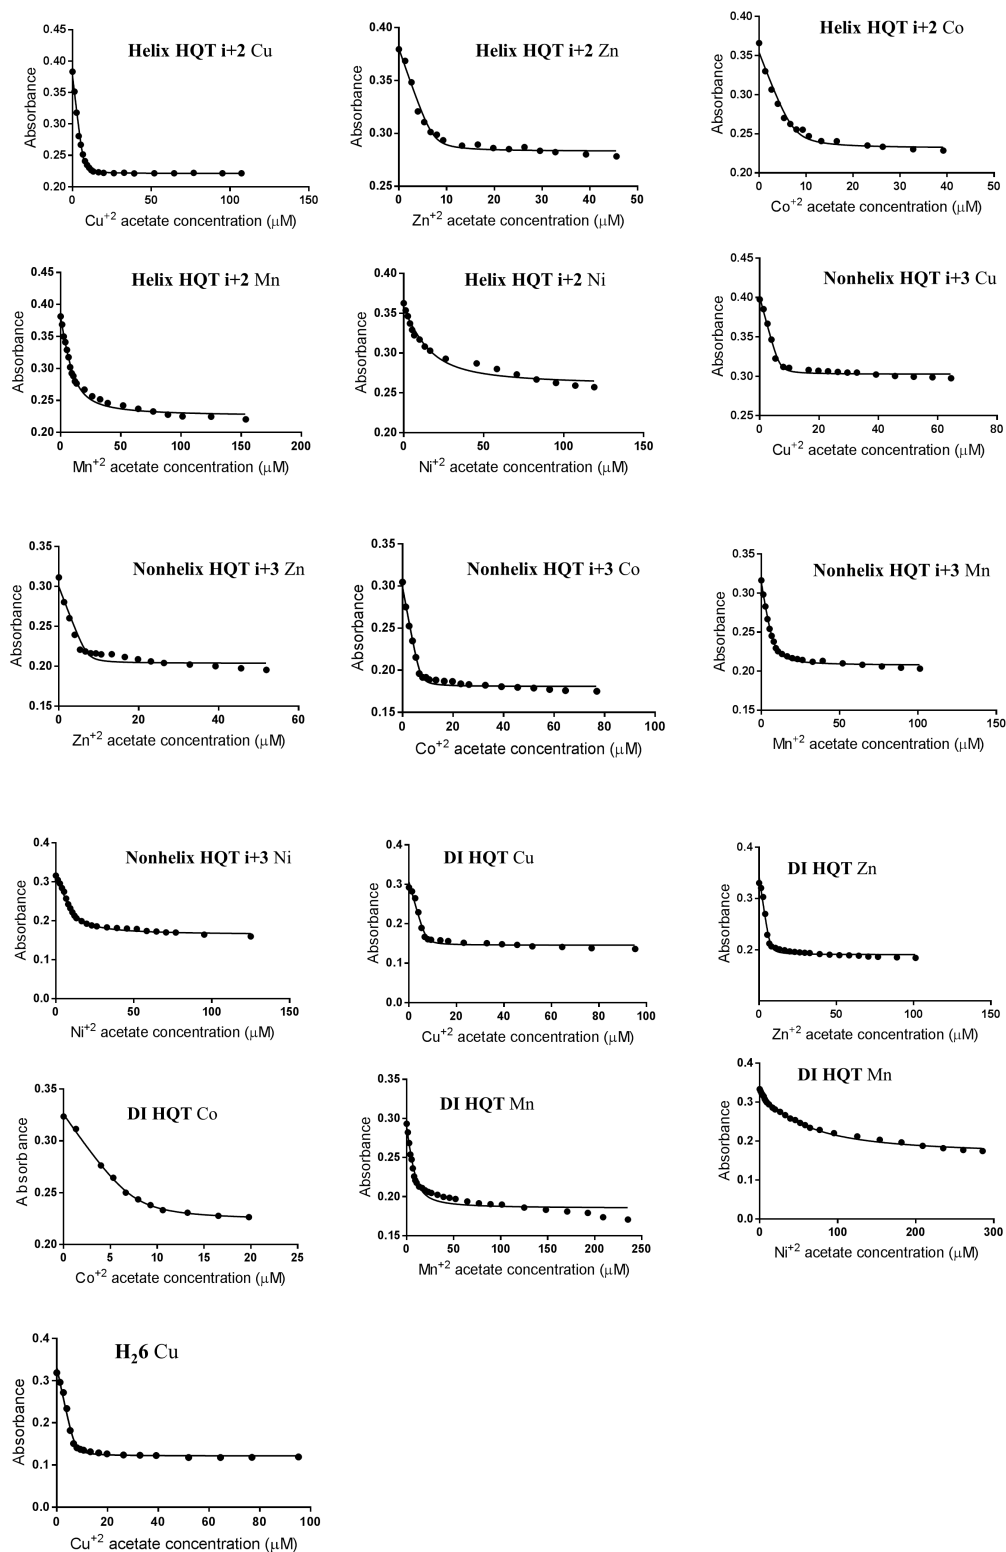

**Figure S58.** Association curve (dots) and fit (line) for the formation of peptoid metal complexes. The fitting was done using a nonlinear regression (curve fit) GraphPad Prism® software.

## EPR

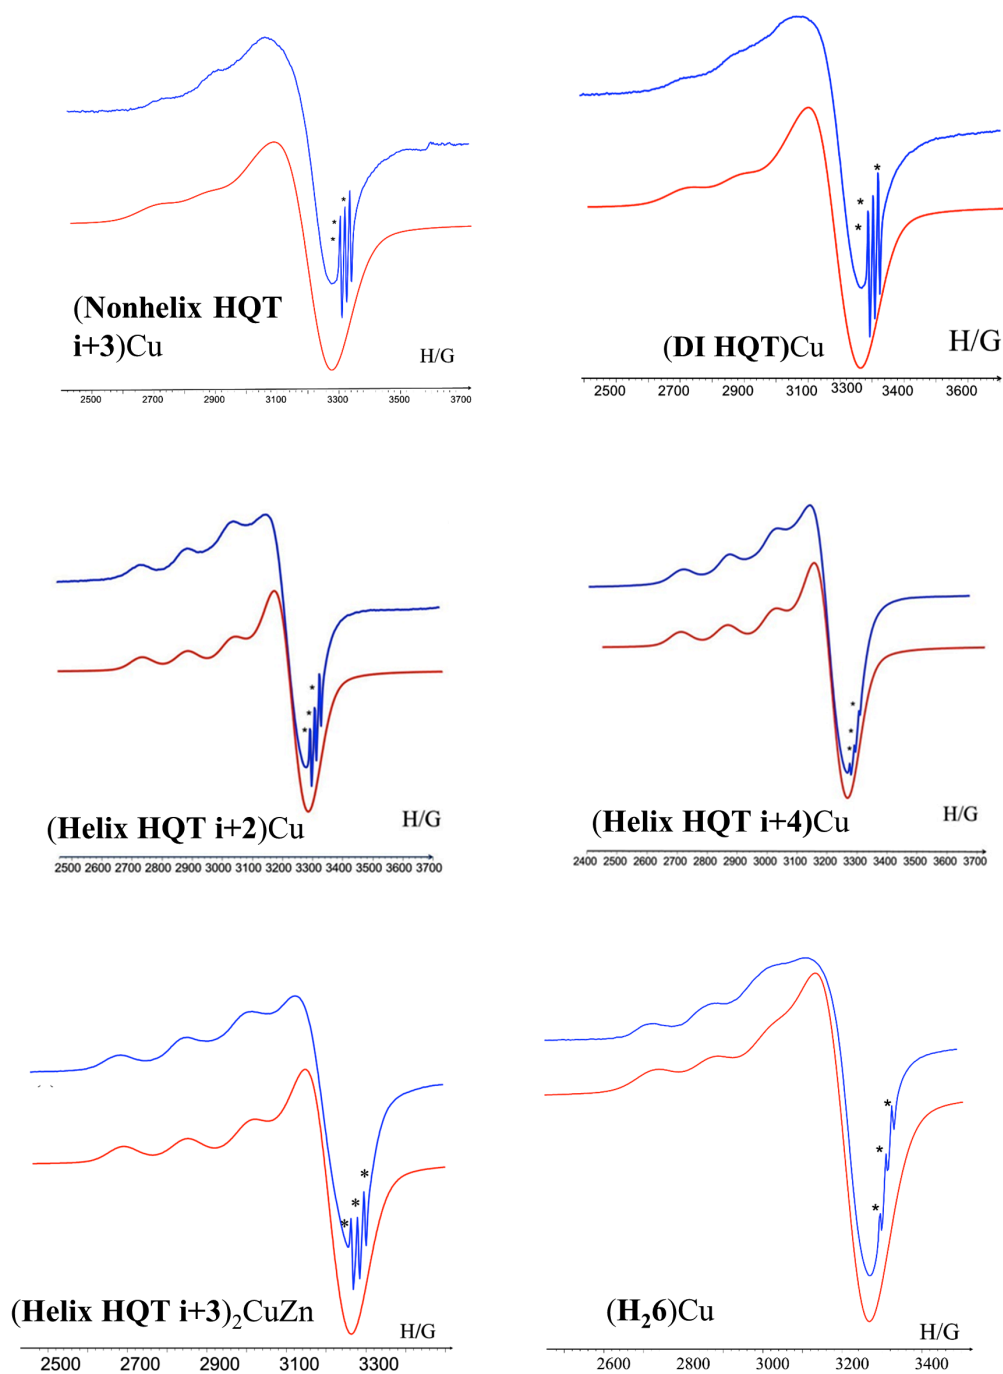

**Figure S59.** Room temperature X-band EPR spectra of copper(II) complexes (blue lines) and corresponding simulated spectra (red lines). Reference- TEMPO marked by\*,  $g = 2.0058$ .

## ESI-MS

**Table S5.** Peptoid oligomer sequences and ESI-MS analysis. *Nhq* = 8-hydroxy-2-quinolinemethylamine, *Nspe* = (S)-(-)-1-Phenylethylamine, *Nterpy* = 2,2':6',2''-Terpyridineamine. *Npm* = N-benzylamine and *Nme* = N-methoxyamine.

| Peptoid                                                           | Molecular weight      | Figure # |
|-------------------------------------------------------------------|-----------------------|----------|
|                                                                   | Calc.: Found (gr/mol) |          |
| <i>Nspe-Nterpy-Nspe-Nspe-Nhq-Nspe</i> ( <b>Helix HQT i+3</b> )    | 1208.4 : 1208.0       | S60      |
| <i>Nme-Nterpy-Npm-Nme-Nhq-Npm</i> ( <b>Nonhelix HQT i+3</b> )     | 1088.2 : 1087.8       | S61      |
| <i>Nterpy-Nhq</i> ( <b>DI HQT</b> )                               | 563.6 : 564.1         | S62      |
| <i>Nspe- Nspe-Nspe- Nterpy-Nspe -Nhq</i> ( <b>Helix HQT i+2</b> ) | 1208.4 : 1209.0       | S63      |
| <i>Nspe-Nterpy-Nspe-Nspe- Nspe -Nhq</i> ( <b>Helix HQT i+4</b> )  | 1208.4 : 1209.0       | S64      |

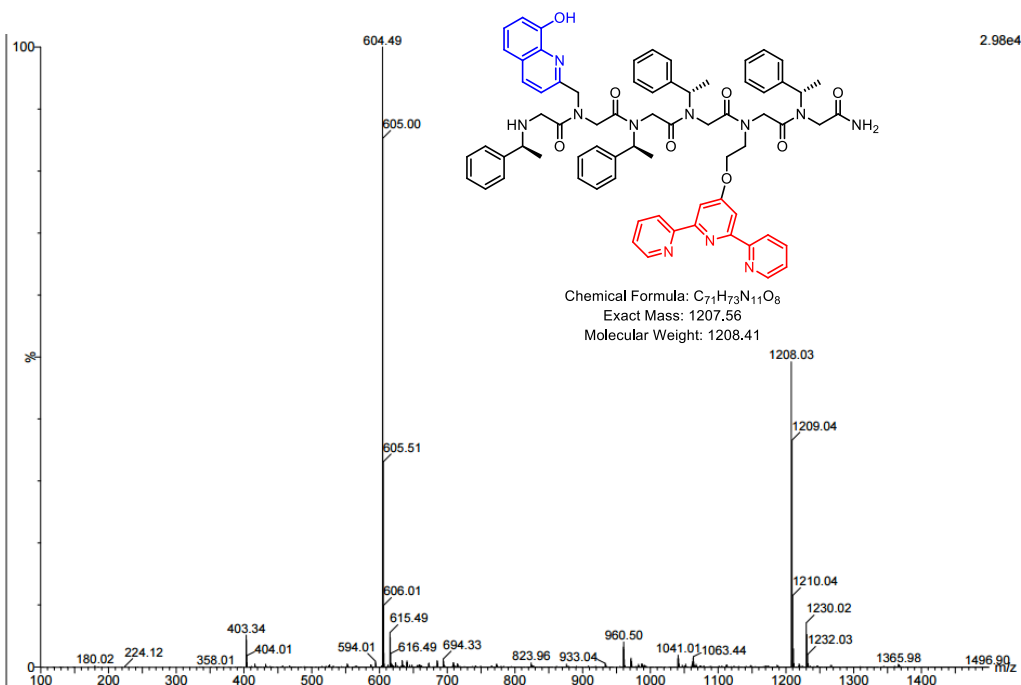

**Figure S60.** ESI-MS traces of peptoid oligomer **Helix HQT i+3**.

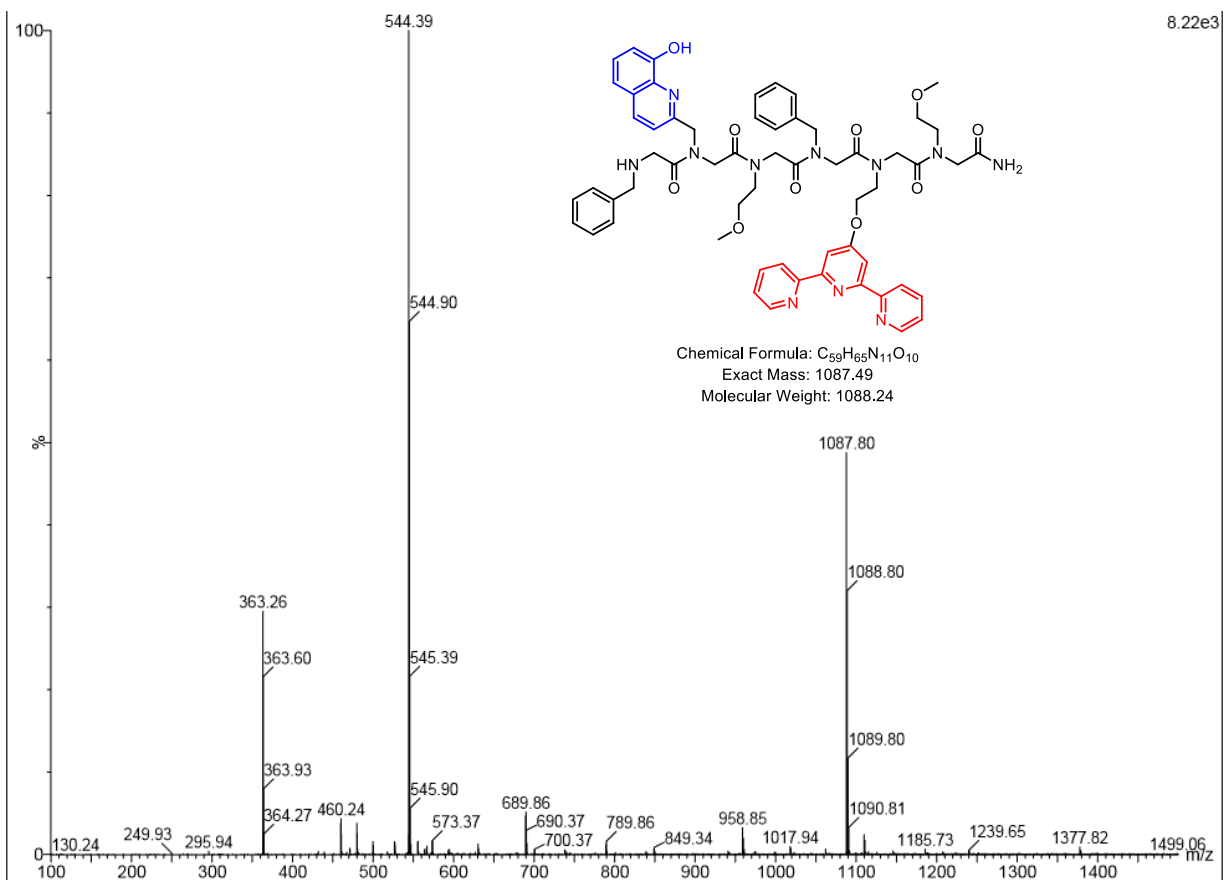

**Figure S61.** ESI-MS traces of peptoid oligomer **Nonhelix HQT i+3**.

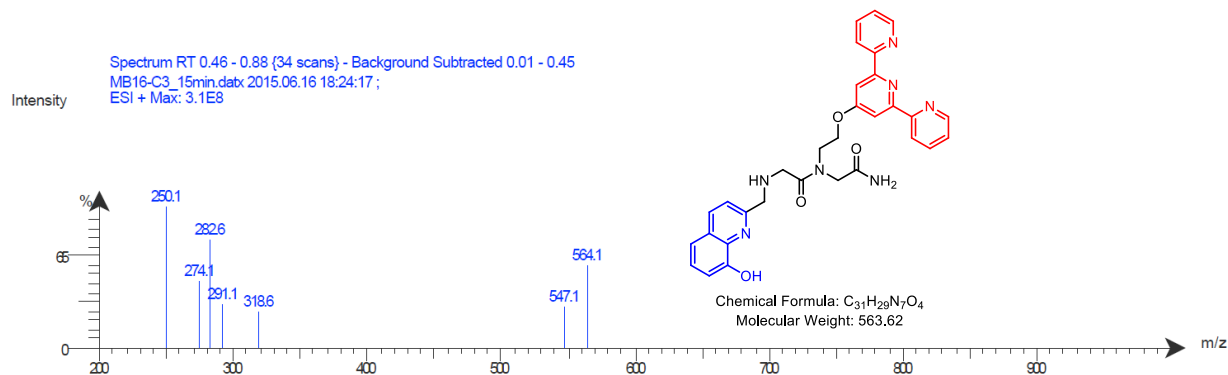

**Figure S62.** ESI-MS traces of peptoid oligomer **DI HQT**.

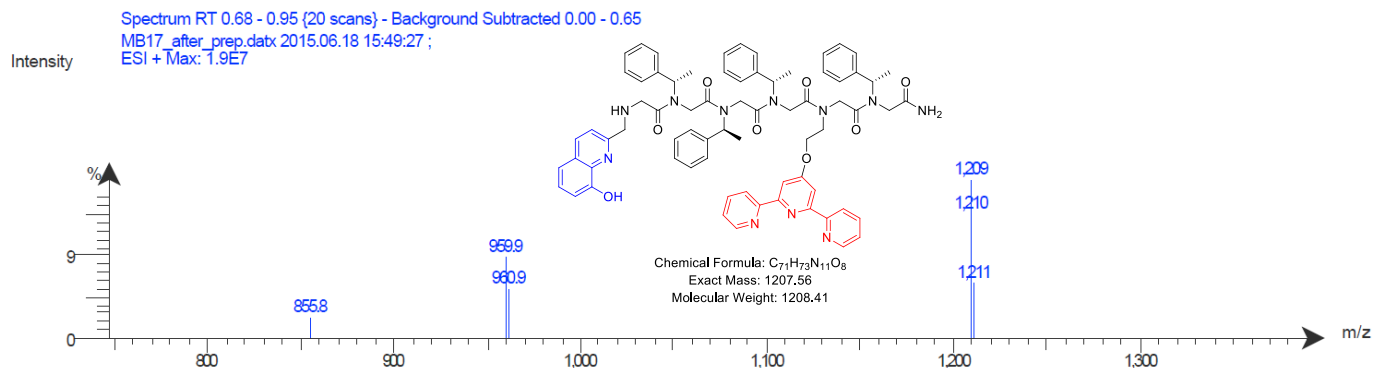

**Figure S63.** ESI-MS traces of peptoid oligomer **Helix HQT i+2**.

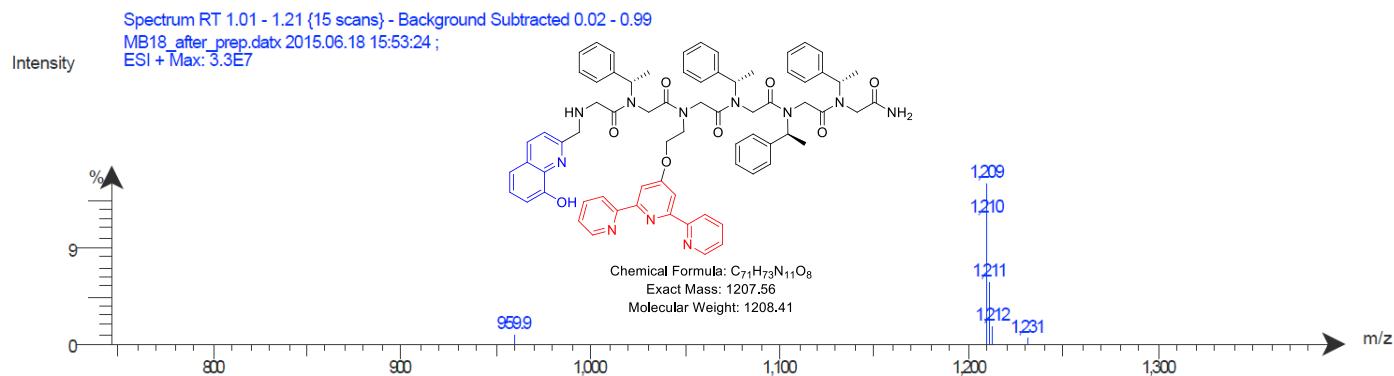

**Figure S64.** ESI-MS traces of peptoid oligomer **Helix HQT i+4**.

**Table S6.** ESI-MS analysis of **Helix HQT i and i+3** metal complexes

| Metallopeptoid                         | Molecular weight                | # Figure |
|----------------------------------------|---------------------------------|----------|
|                                        | Calc.: Found (gr/mol)           |          |
| <b>(Helix HQT i+3)Cu</b>               | 1269.49 : 1269.56               | S65-66   |
| <b>(Helix HQT i+3)Co</b>               | 1265.49 : 1265.40               | S67-68   |
| <b>(Helix HQT i+3)Zn</b>               | 1270.49 : 1270.41               | S69-70   |
| <b>(Helix HQT i+3)Fe</b>               | 1362.39 (m/2z) : 1362.44 (m/2z) | S71-77   |
| <b>(Helix HQT i+3)Ni</b>               | 1264.49 : 1264.41               | S73-74   |
| <b>(Helix HQT i+3)Mn</b>               | 1261.49: 1261.40                | S75-S76  |
| <b>(Helix HQT i+3)<sub>2</sub>CuCo</b> | 846.67(m/3z) : 846.58 (m/3z)    | S85-86   |
| <b>(Helix HQ i+3)<sub>2</sub>CuZn</b>  | 848.33(m/3z) : 848.24 (m/3z)    | S87-89   |
| <b>(Helix HQT i+3)<sub>2</sub>CuFe</b> | 844.66(m/3z) : 844.61 (m/3z)    | S90-91   |

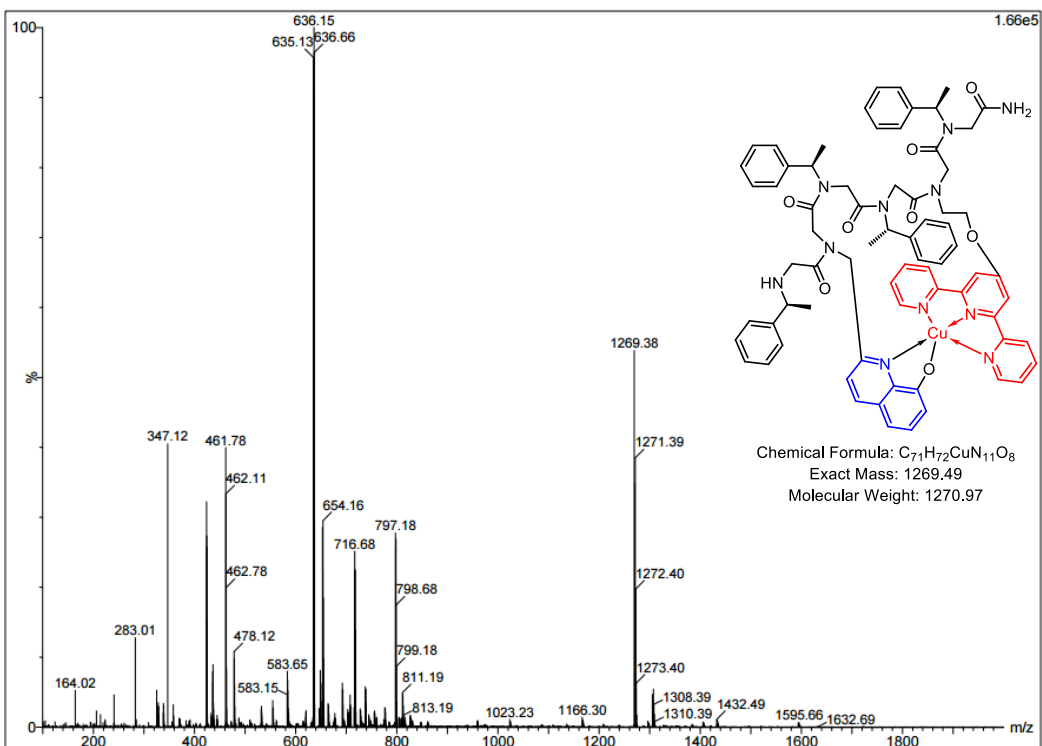

**Figure S65.** ESI-MS traces of (Helix HQT i+3)Cu complex.

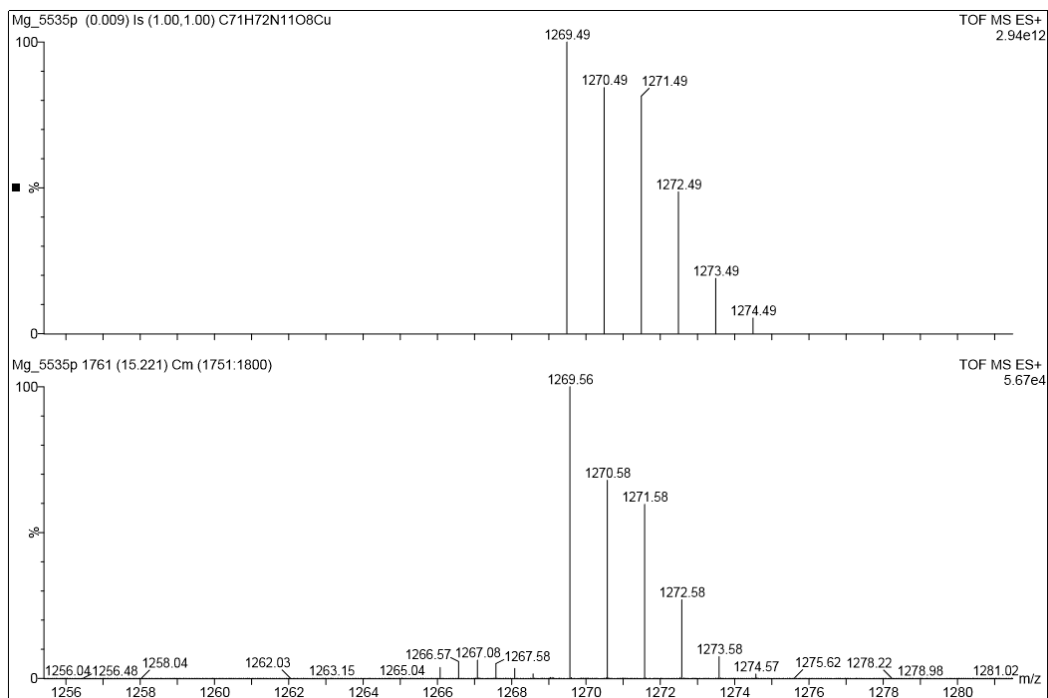

**Figure S66.** Experimental isotopic analysis by ESI-MS of (Helix HQT i+3)Cu complex (bottom) and calculated ESI-MS spectrum (top).

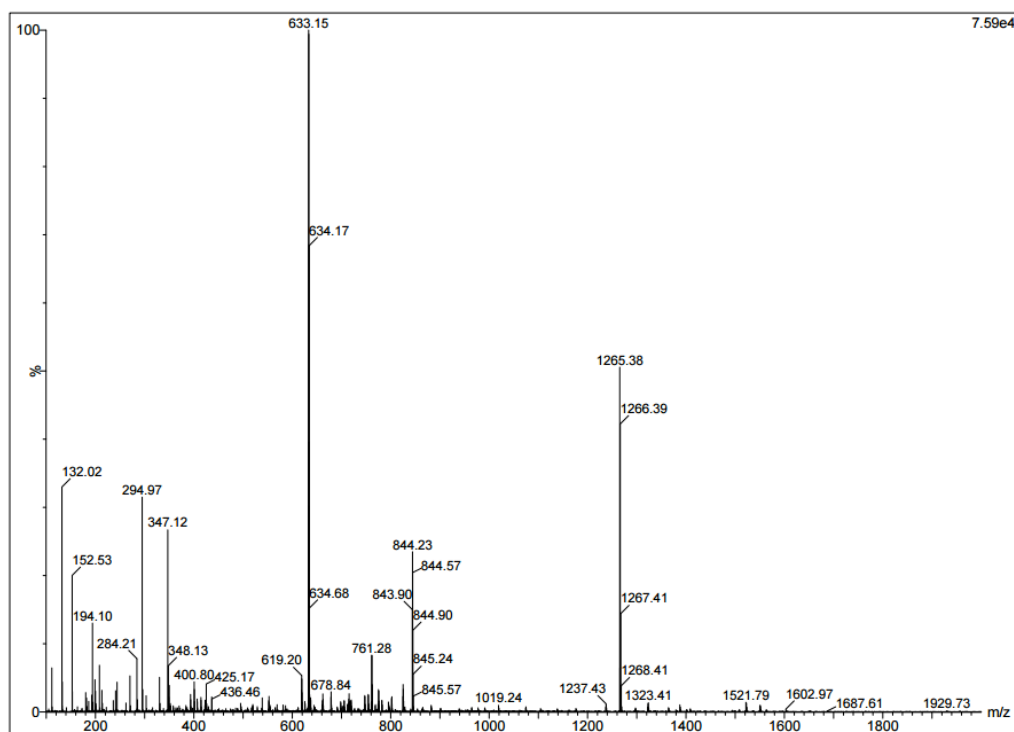

**Figure S67.** ESI-MS traces of (Helix HQT i+3)Co complex.

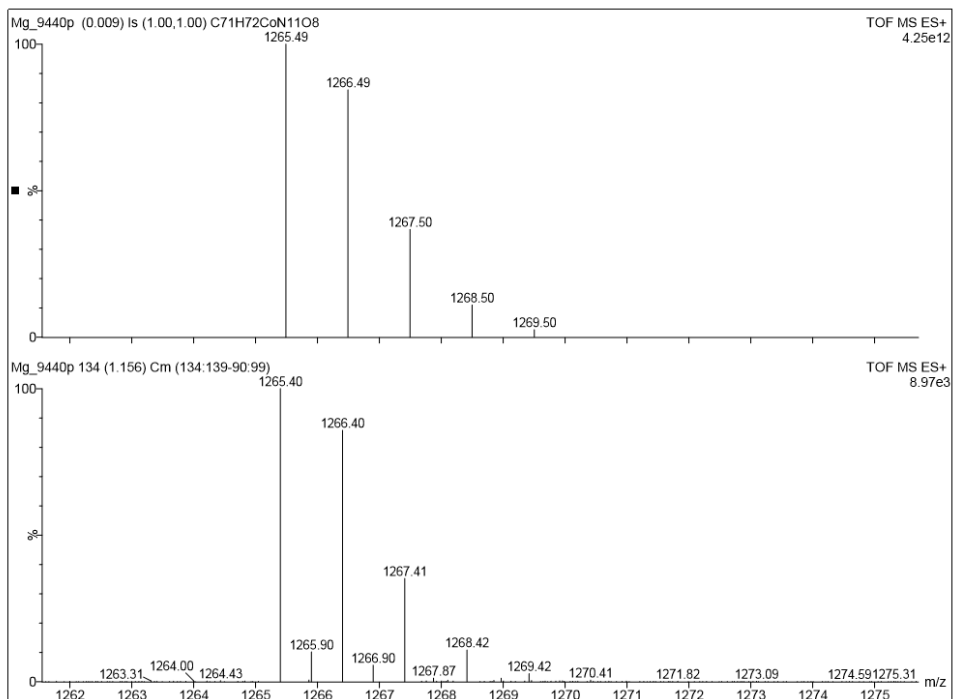

**Figure S68.** Experimental isotopic analysis by ESI-MS of (Helix HQT i+3)Co complex (bottom) and calculated ESI-MS spectrum (top).

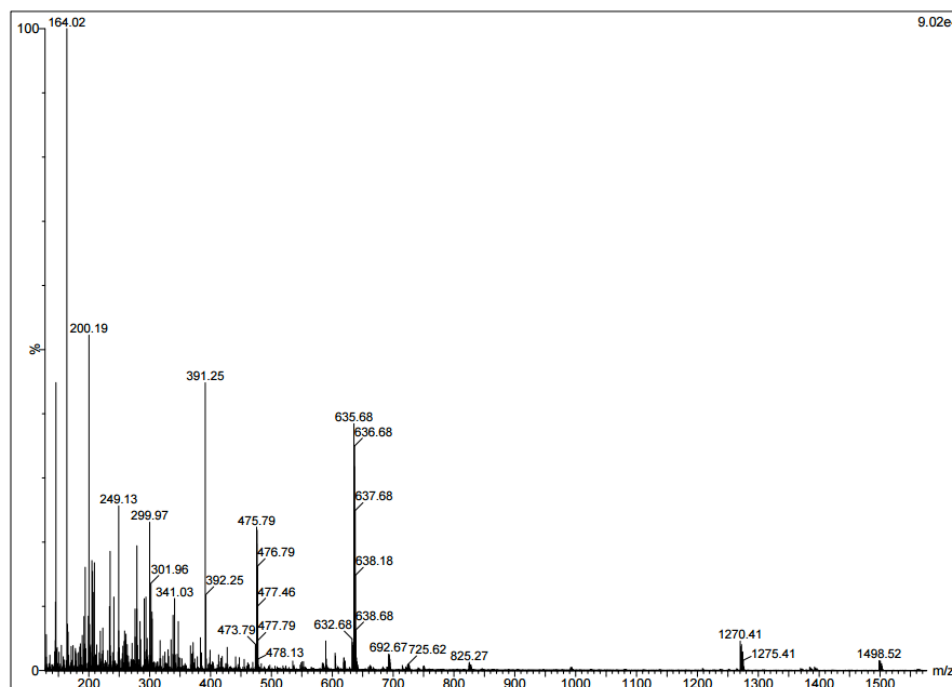

**Figure S69.** ESI-MS traces of (Helix HQT i+3)Zn complex.

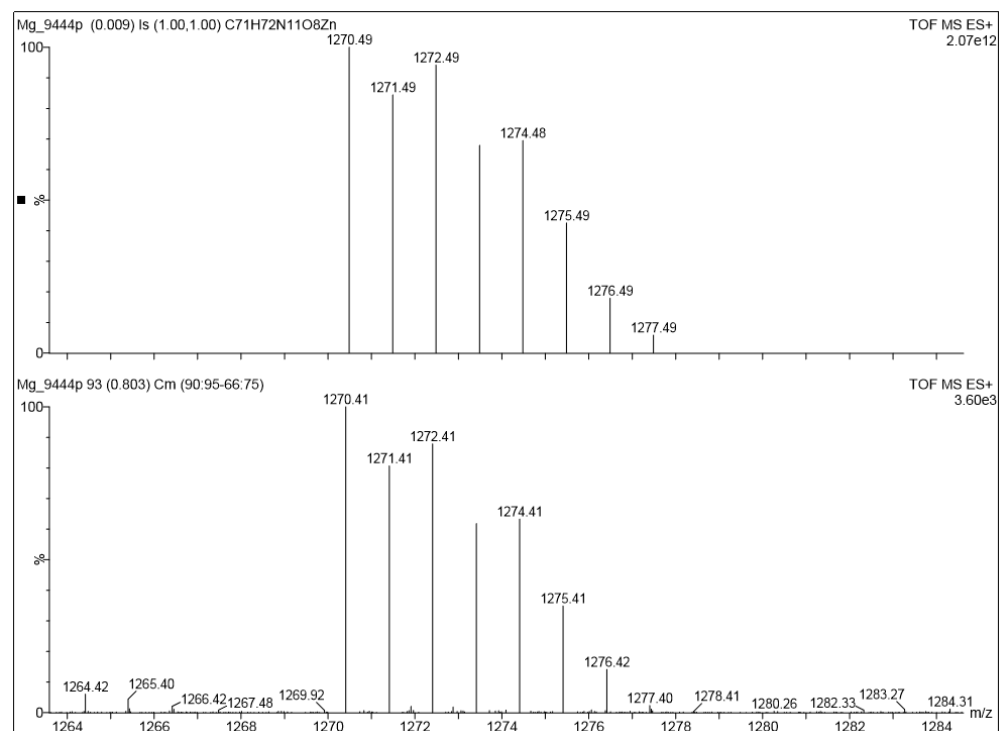

**Figure S70.** Experimental isotopic analysis by ESI-MS of (Helix HQT i+3)Zn complex (bottom) and calculated ESI-MS spectrum (top).

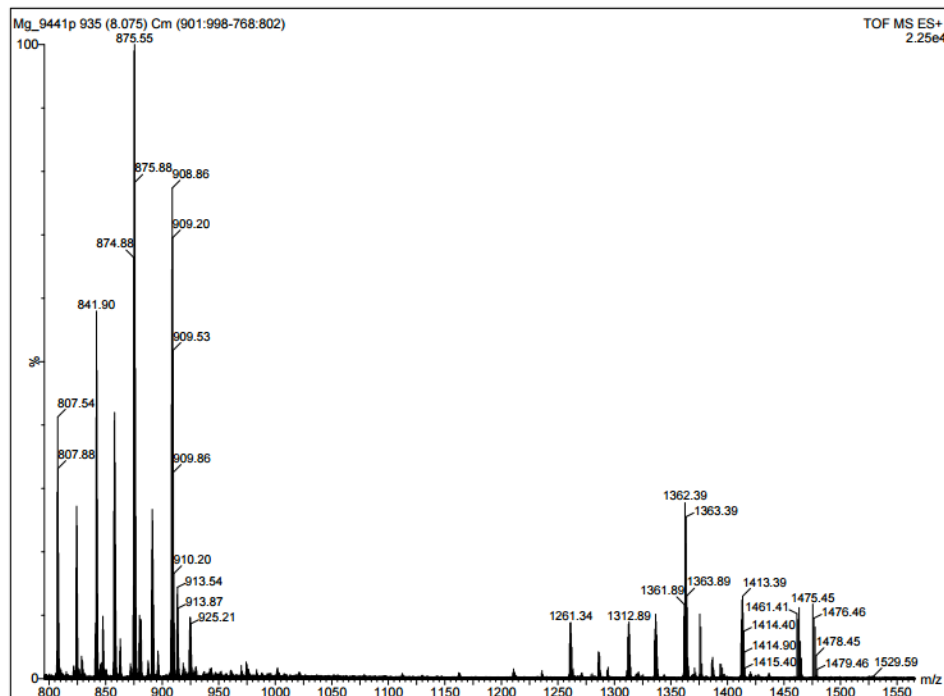

**Figure S71.** ESI-MS traces of **(Helix HQT i+3)Fe** complex.

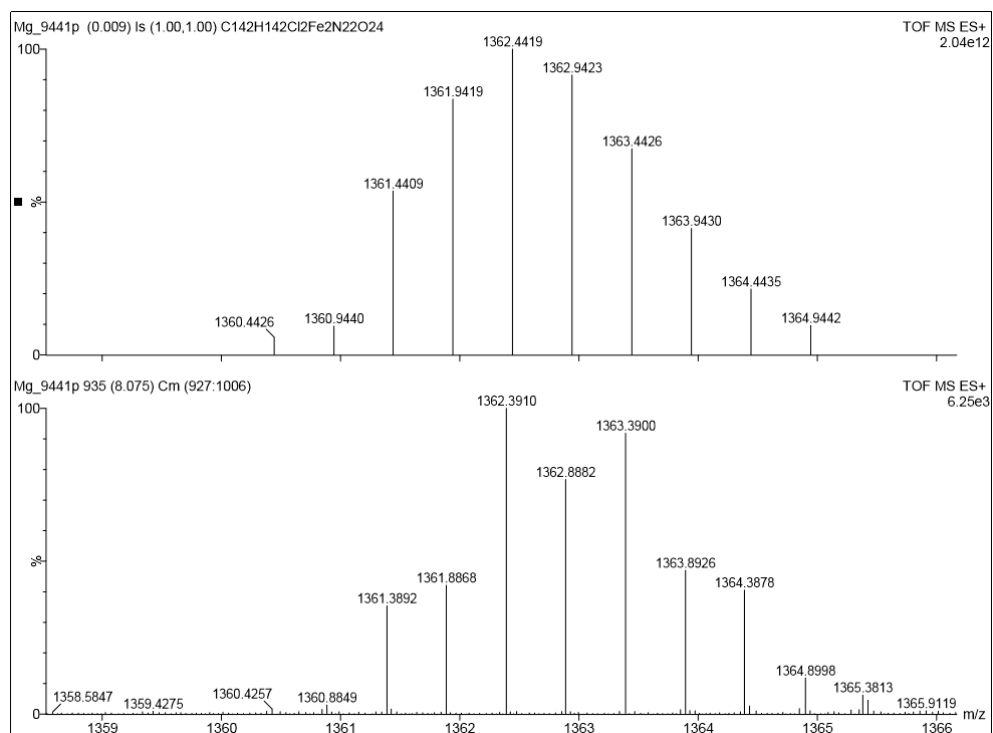

**Figure S72.** Experimental isotopic analysis by ESI-MS of **(Helix HQT i+3)Fe** complex (bottom) and calculated ESI-MS spectrum (top).

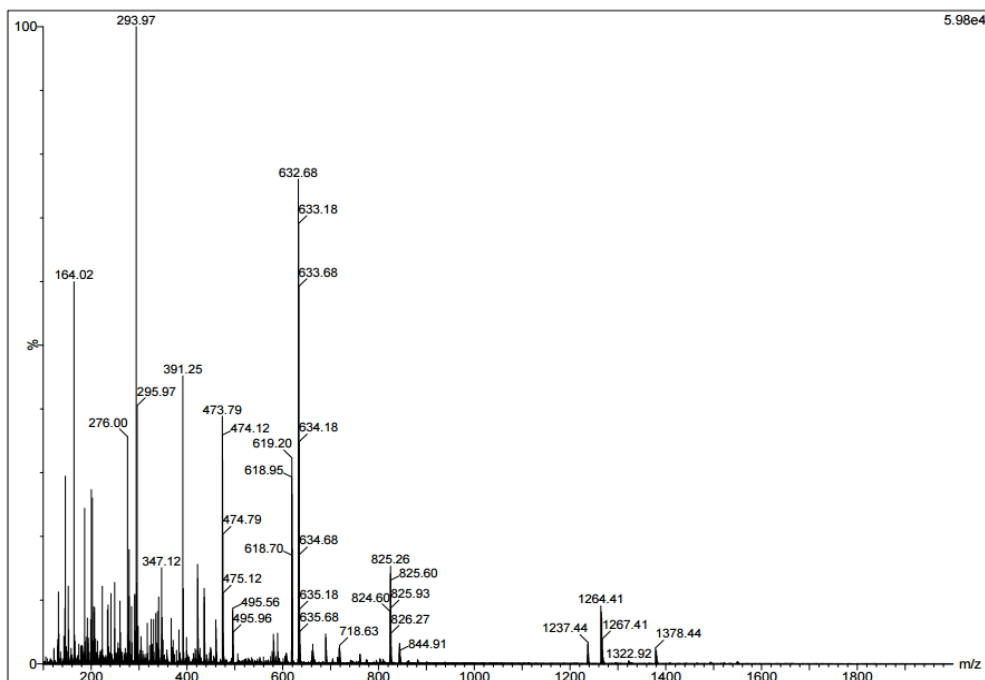

**Figure S73.** ESI-MS traces of (Helix HQT i+3)Ni complex.

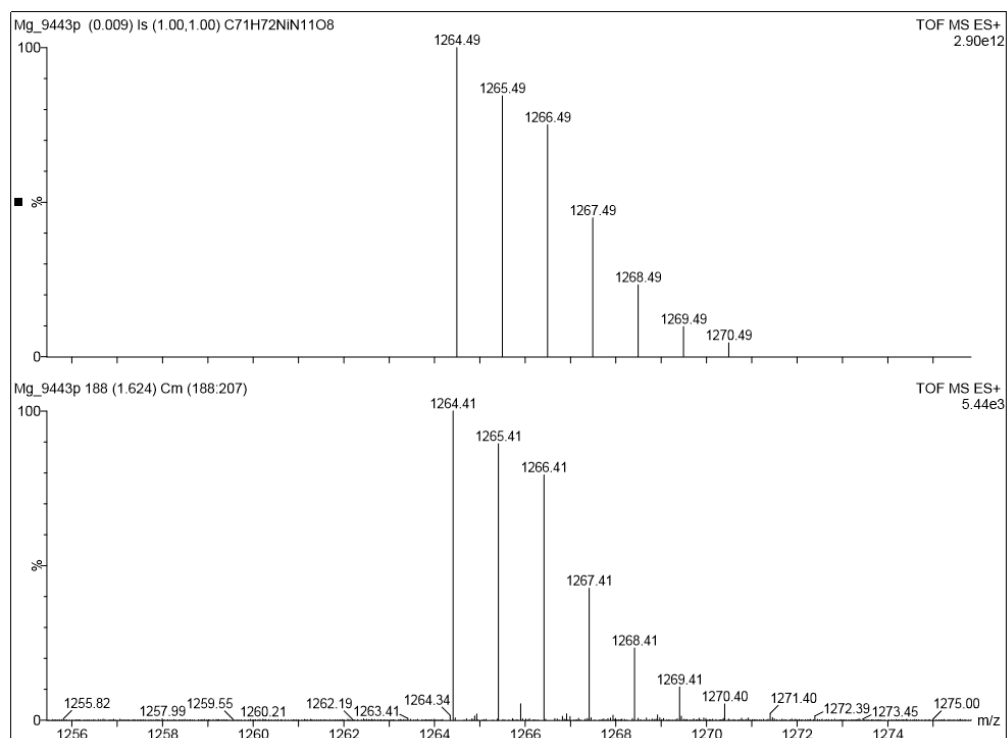

**Figure S74.** Experimental isotopic analysis by ESI-MS of (**Helix HQT i+3**)Ni complex (bottom) and calculated ESI-MS spectrum (top).

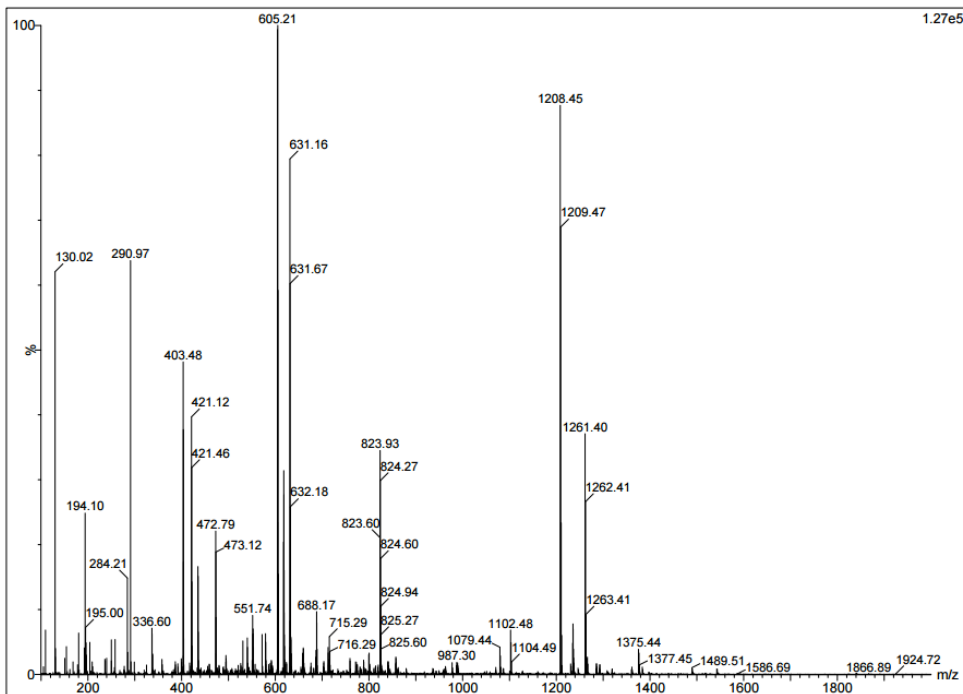

**Figure S75.** ESI-MS traces of (Helix HQT i+3)Mn complex.

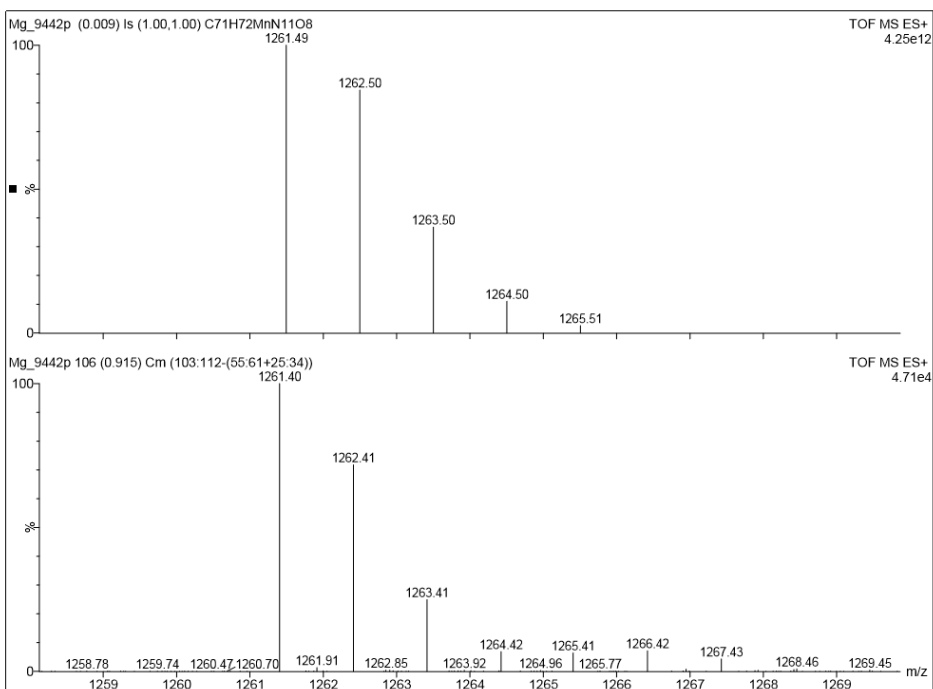

**Figure S76.** Experimental isotopic analysis by ESI-MS of (Helix HQT i+3)Mn complex (bottom) and calculated ESI-MS spectrum (top).

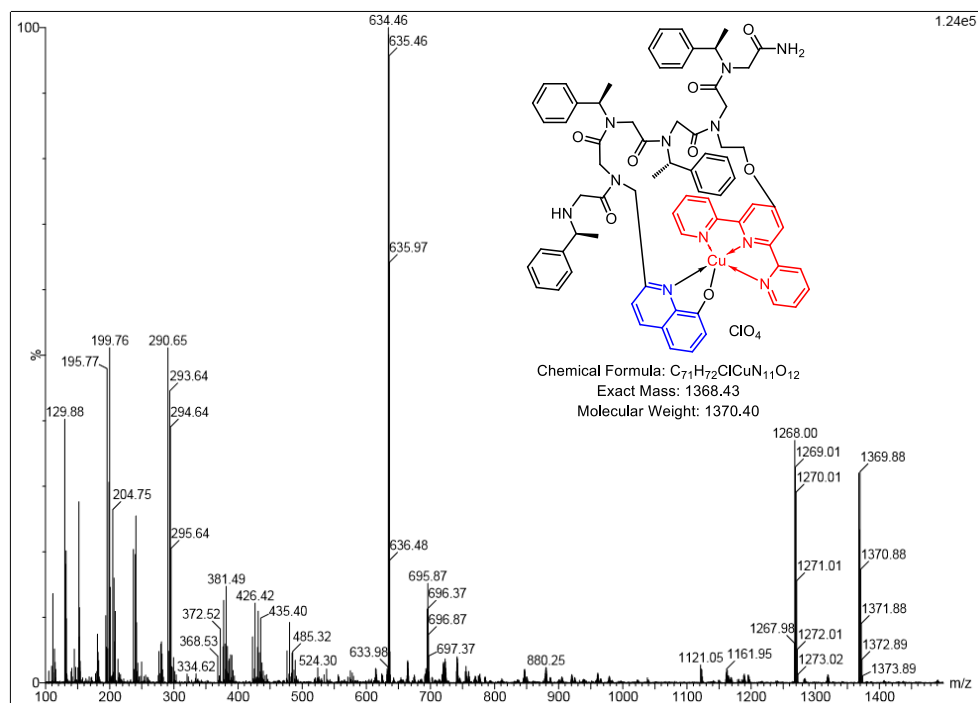

**Figure S77.** ESI-MS traces of peptoid oligomer **Helix HQT i+3** with 1 equiv. of  $\text{Cu}^{2+}$ ,  $\text{Co}^{2+}$ ,  $\text{Ni}^{2+}$ ,  $\text{Mn}^{2+}$ ,  $\text{Fe}^{3+}$ ,  $\text{Zn}^{2+}$ .

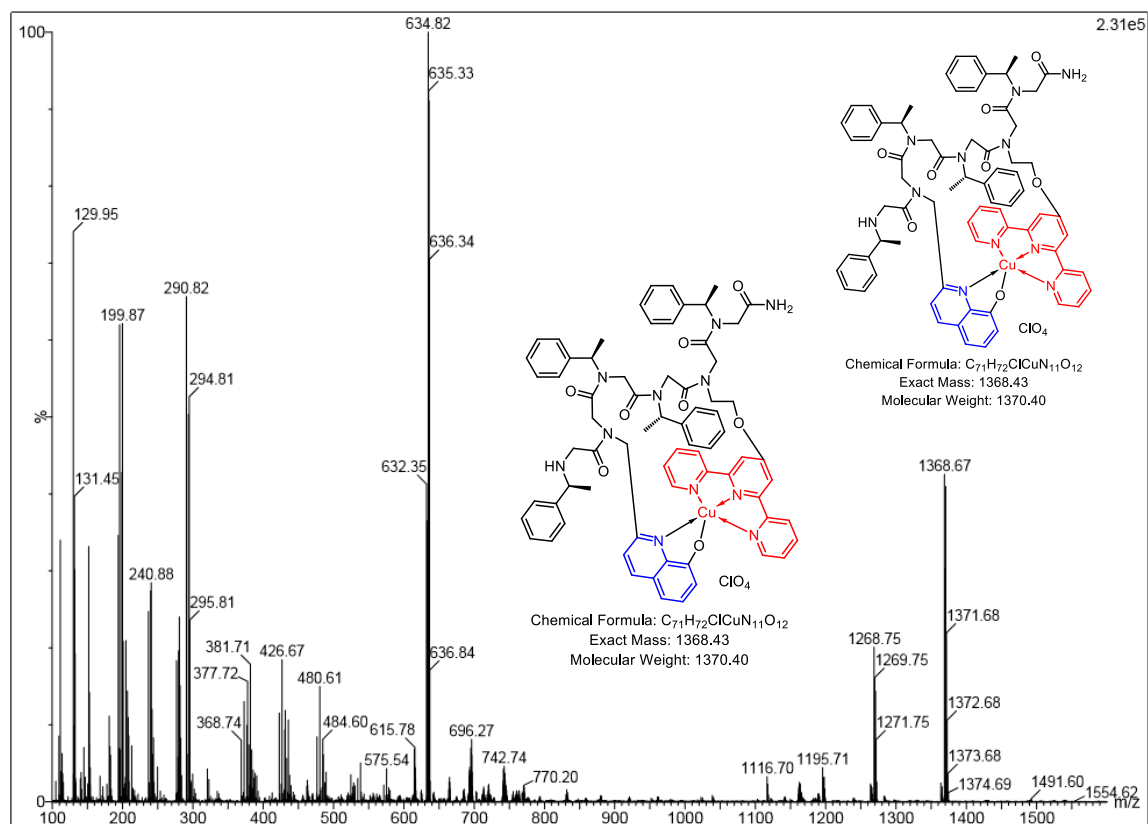

**Figure S78.** ESI-MS traces of peptoid oligomer **Helix HQT i+3** with 1 equiv. of  $Cu^{2+}$  and 10 equiv.  $Co^{2+}$ ,  $Ni^{2+}$ ,  $Mn^{2+}$ ,  $Fe^{3+}$  and  $Zn^{2+}$ .

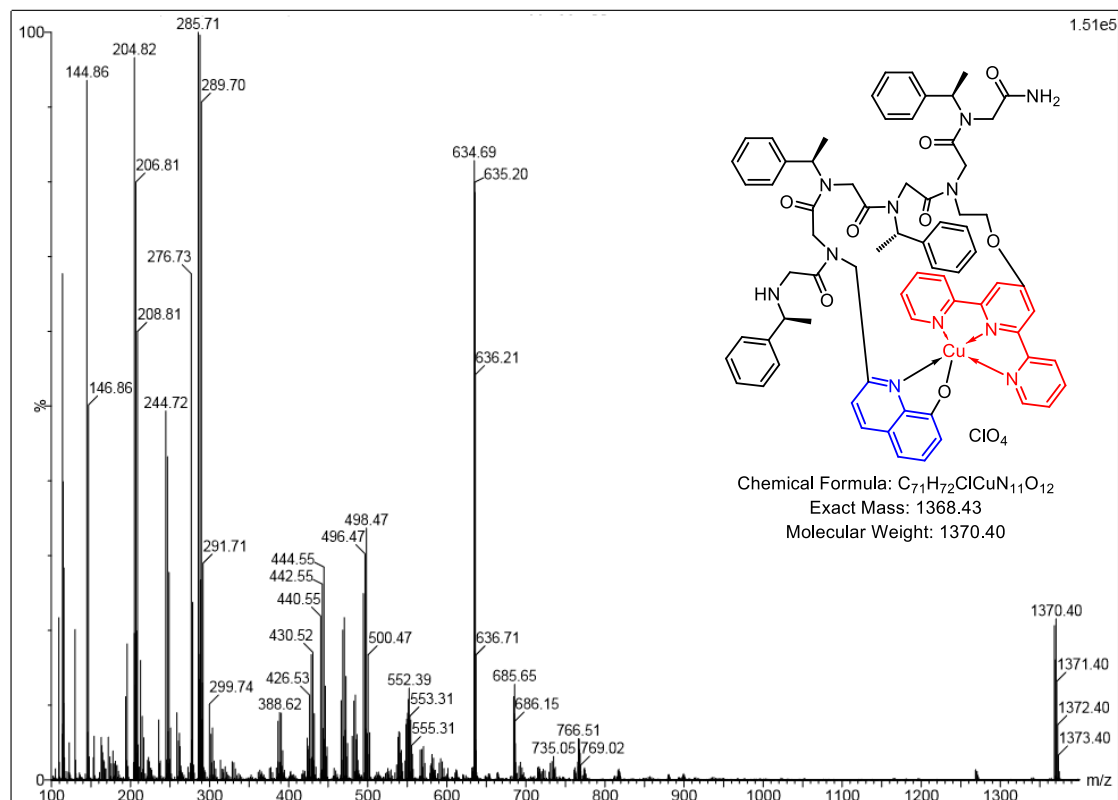

**Figure S79.** ESI-MS traces of peptoid oligomer **Helix HQT i+3** with 1 equiv. of Cu<sup>2+</sup> and 20 equiv. Co<sup>2+</sup>, Ni<sup>2+</sup>, Mn<sup>2+</sup>, Fe<sup>3+</sup> and Zn<sup>2+</sup>.

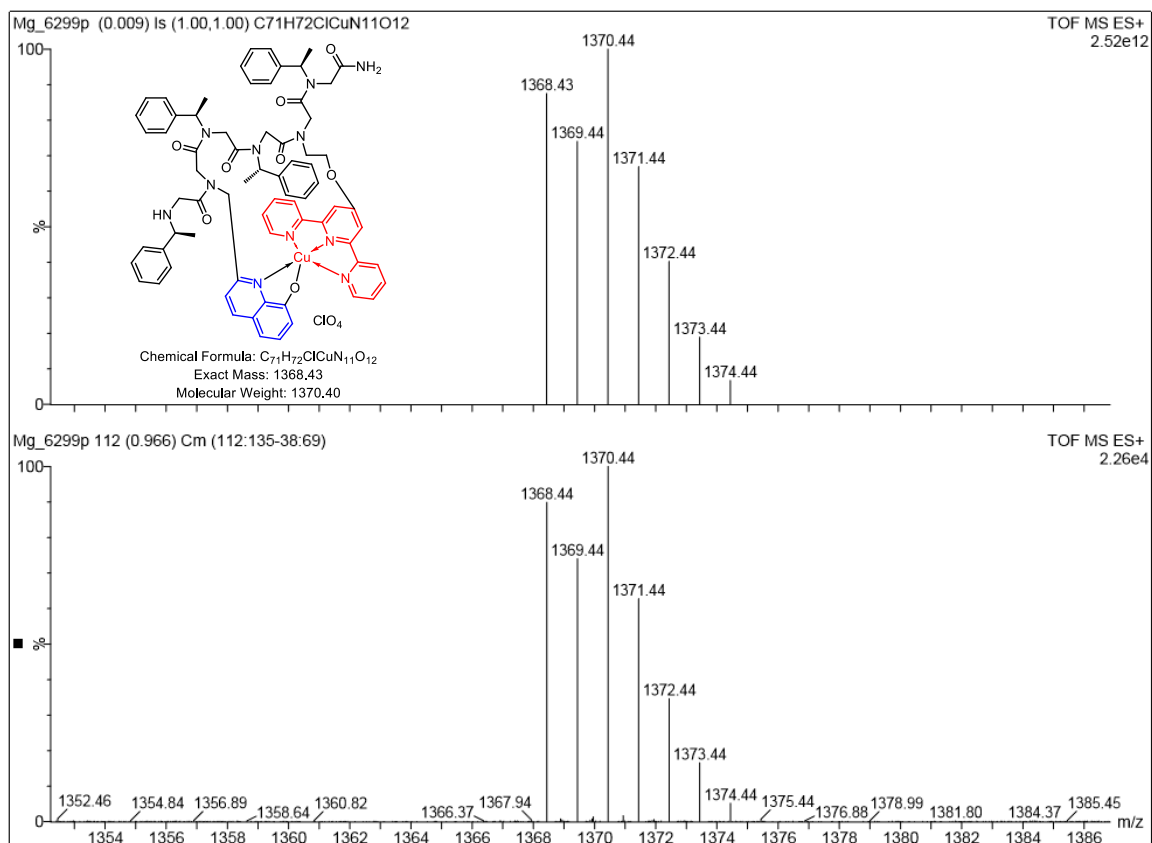

**Figure S80.** Experimental isotopic analysis by ESI-MS of (**Helix HQT i+3**)Cu-perchlorate complex (bottom) and calculated ESI-MS spectrum (top).

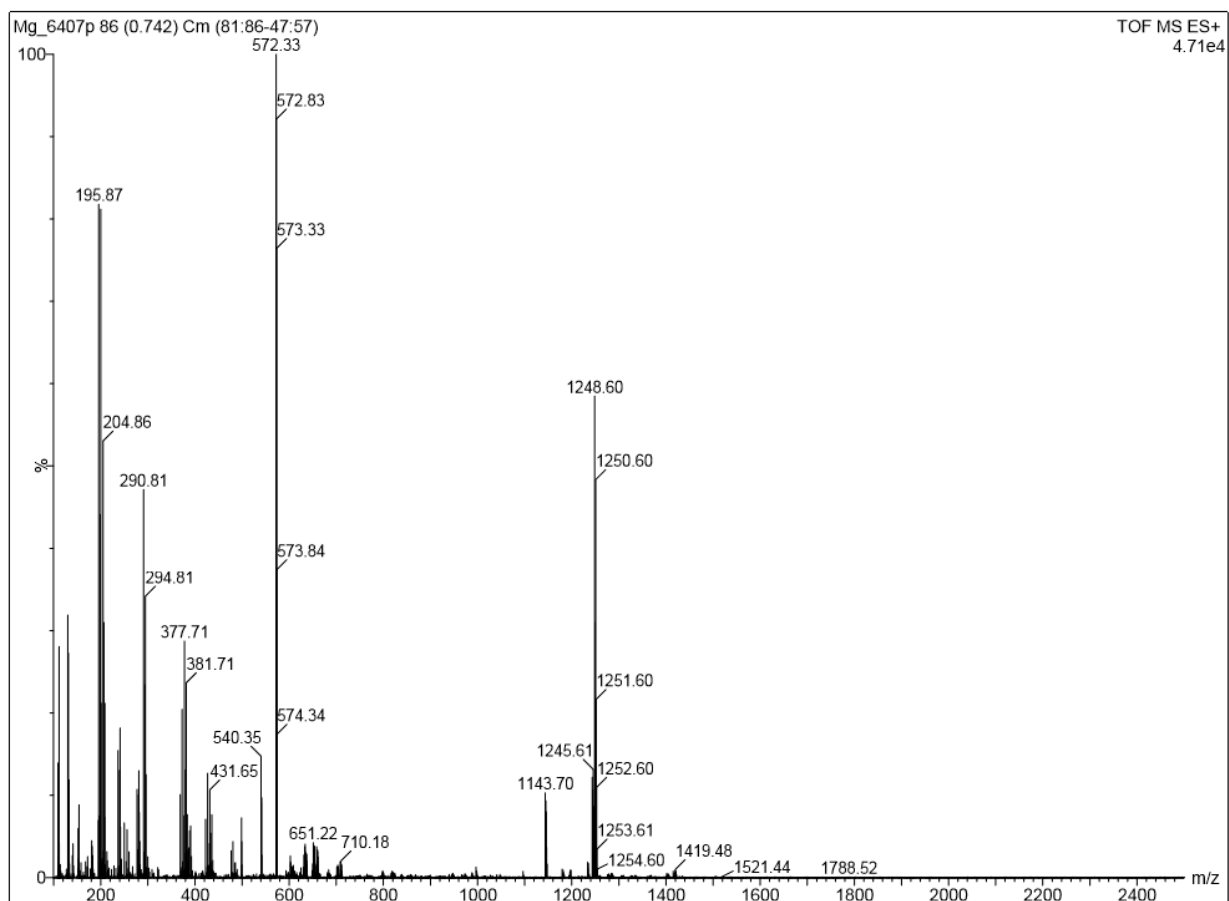

**Figure S81.** ESI-MS traces of peptoid oligomer **Nonhelix HQT i+3** with 1 equiv. of  $\text{Cu}^{2+}$ ,  $\text{Co}^{2+}$ ,  $\text{Ni}$ ,  $\text{Mn}^{2+}$ ,  $\text{Fe}^{3+}$  and  $\text{Zn}^{2+}$ .

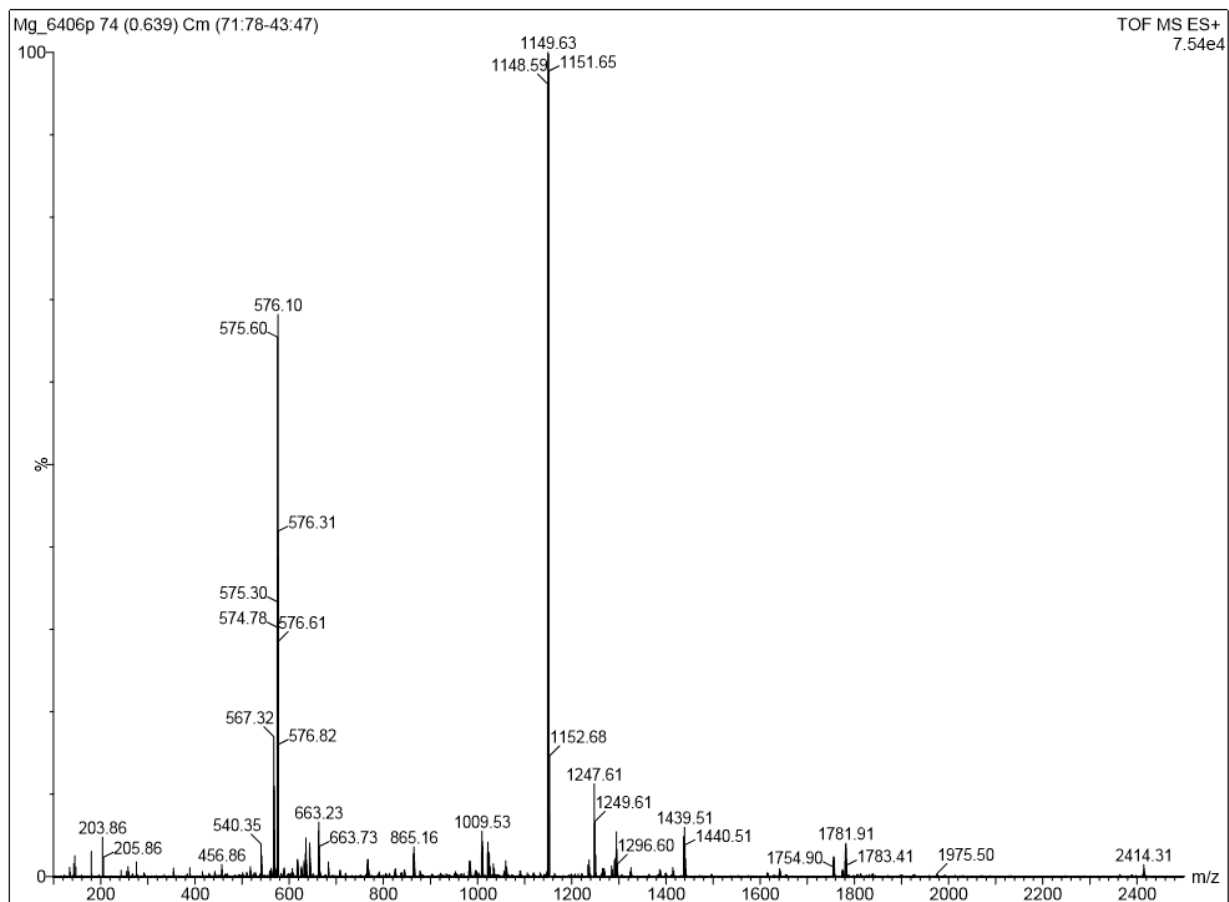

**Figure S82.** ESI-MS traces of peptoid oligomer **Nonhelix HQT i+3** with 1 equiv. of  $\text{Cu}^{2+}$ .

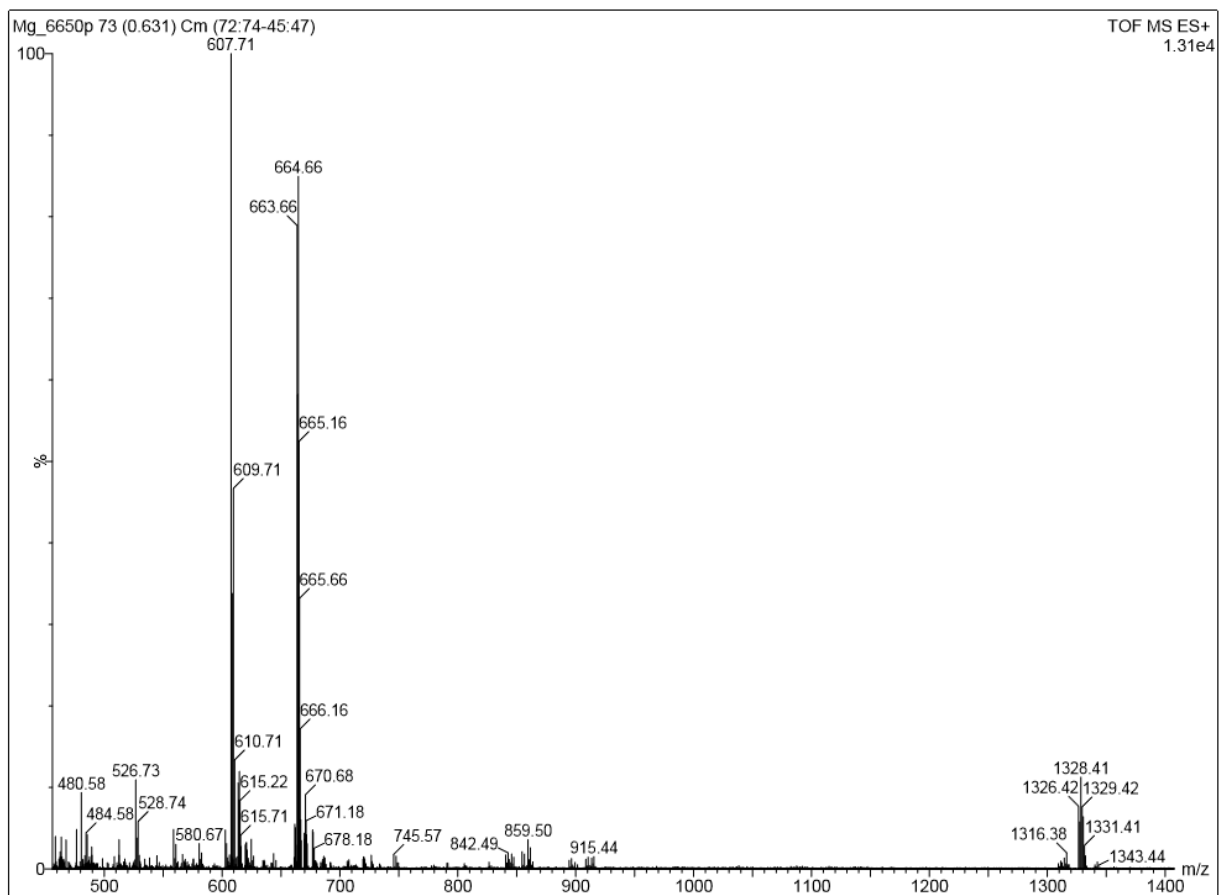

**Figure S83.** ESI-MS traces of peptoid oligomer **DI HQT** with 1 equiv. of  $\text{Cu}^{2+}$ ,  $\text{Co}^{2+}$ ,  $\text{Ni}^{2+}$ ,  $\text{Mn}^{2+}$ ,  $\text{Fe}^{3+}$  and  $\text{Zn}^{2+}$ .

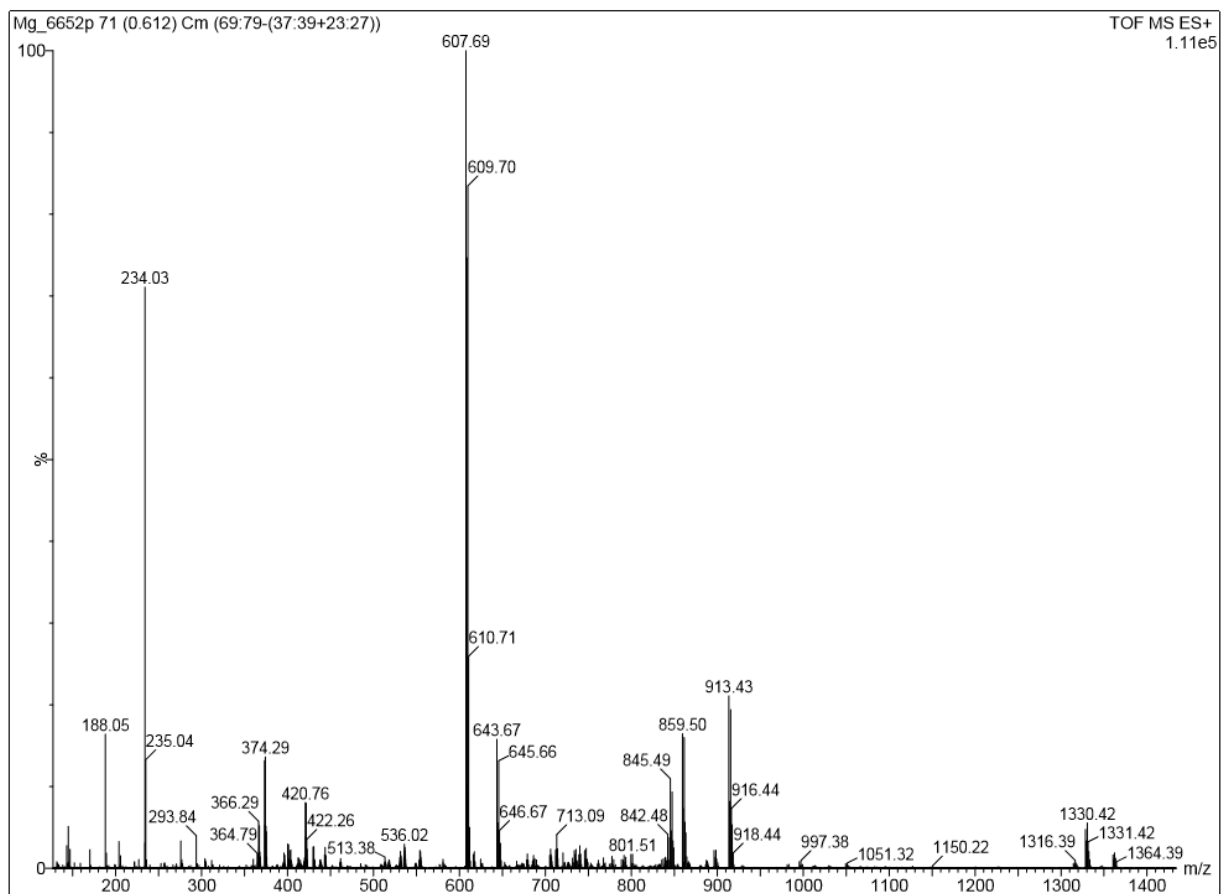

**Figure S84.** ESI-MS traces of peptoid oligomer **DI HQT** with 1 equiv.  $\text{Cu}^{2+}$ .

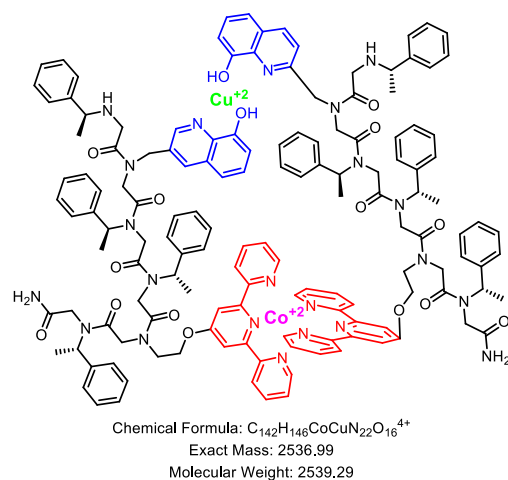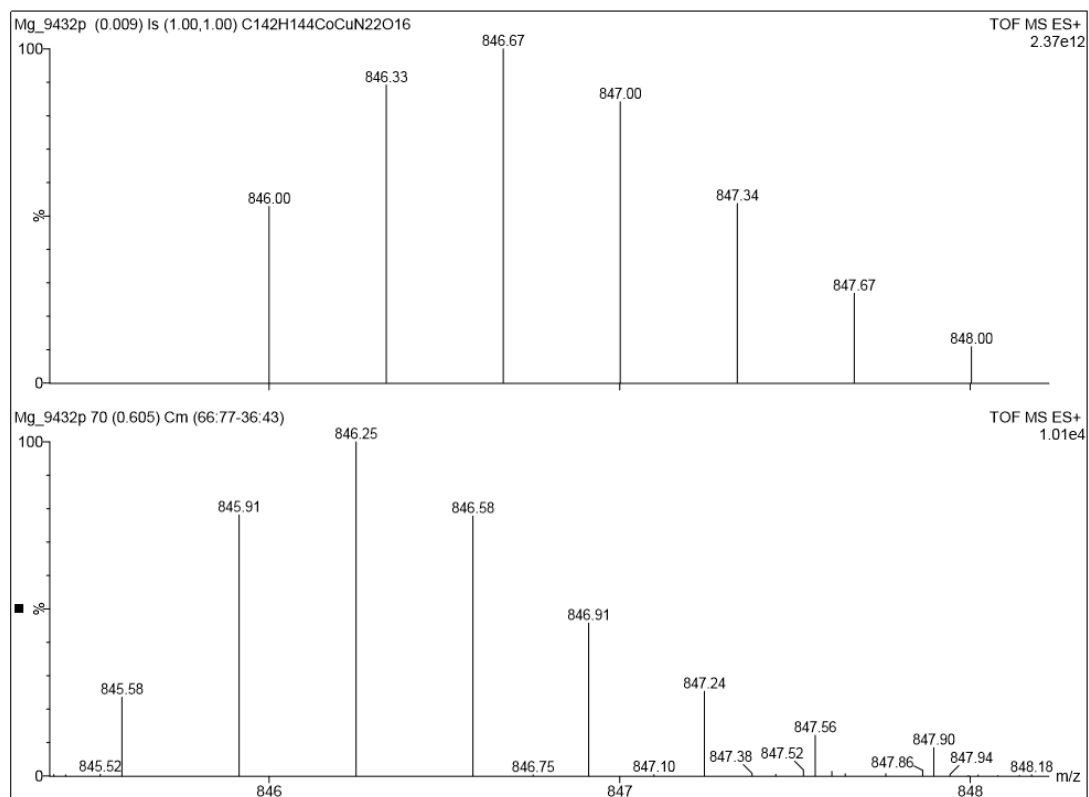

**Figure S85.** Experimental isotopic analysis by ESI-MS  $m/z$  of **(Helix HQT i+3)<sub>2</sub>CoCu** hetero bi-metallic peptoid complex synthesized by step approach (bottom) and calculated ESI-MS spectrum (top).

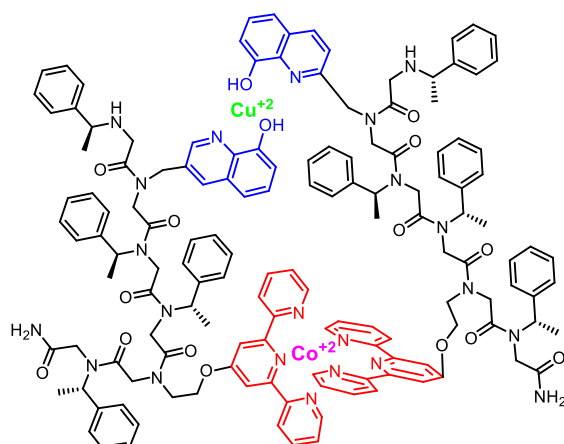

Chemical Formula:  $C_{142}H_{146}CoCuN_{22}O_{16}^{4+}$   
 Exact Mass: 2536.99  
 Molecular Weight: 2539.29

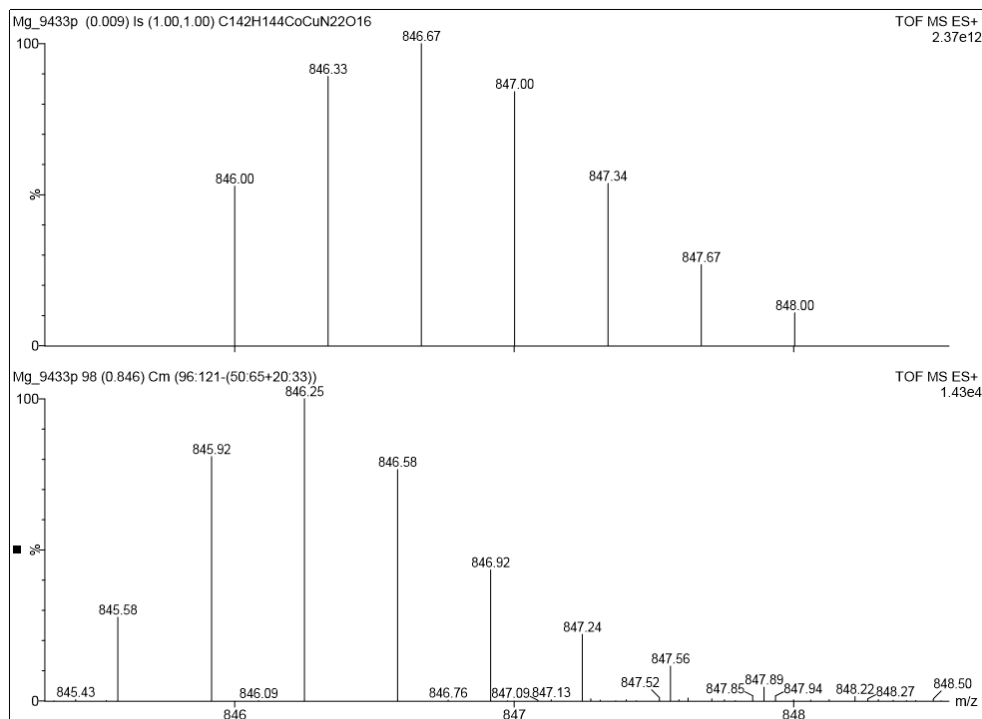

**Figure S86.** Experimental isotopic analysis by ESI-MS  $m/z$  traces of **(Helix HQT i and i+3)<sub>2</sub>CoCu** hetero bi-metallic peptoid duplex synthesized by mix approach (bottom) and calculated ESI-MS spectrum (top).

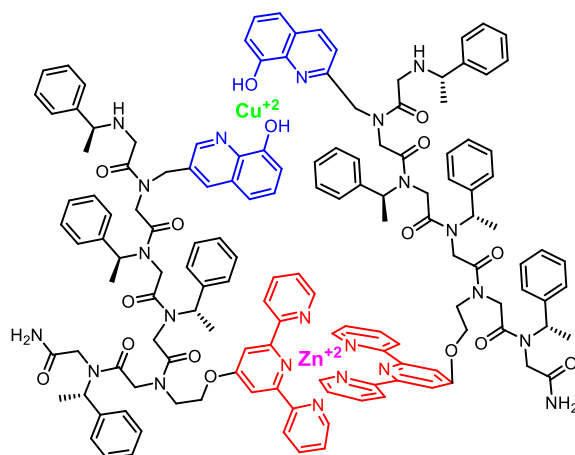

Chemical Formula:  $C_{142}H_{146}CuN_{22}O_{16}Zn^{4+}$

Exact Mass: 2541.99

Molecular Weight: 2545.74

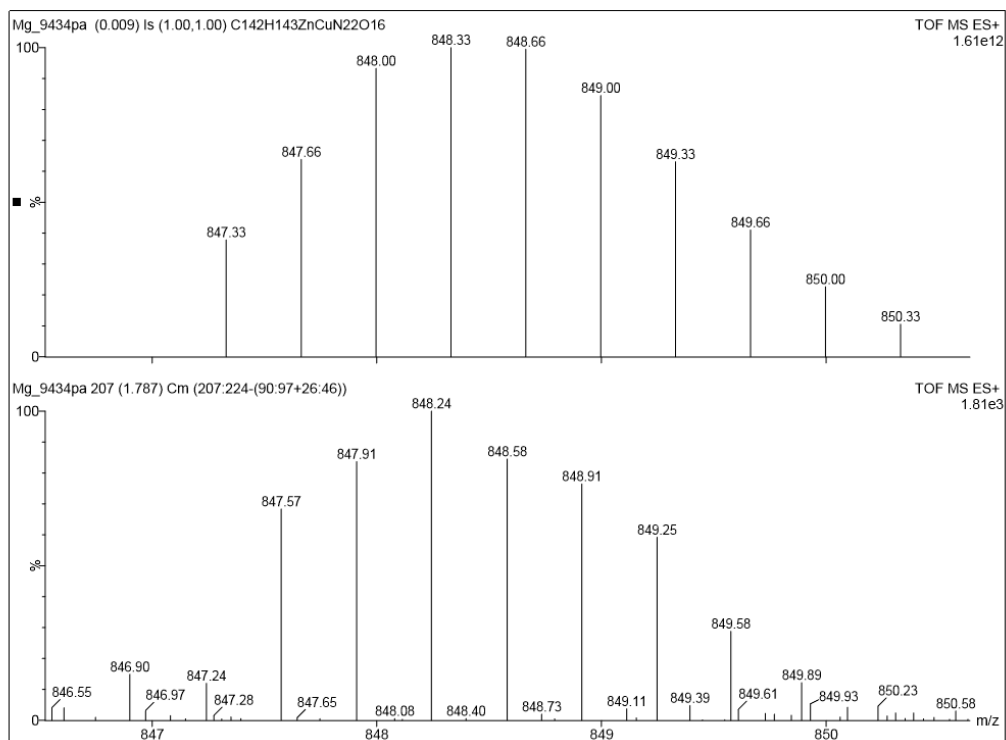

**Figure S87.** Experimental isotopic analysis by ESI-MS  $m/z$  traces of **(Helix HQT i+3)<sub>2</sub>ZnCu** hetero bi-metallic peptoid duplex synthesized by step approach (bottom) and calculated ESI-MS spectrum (top).

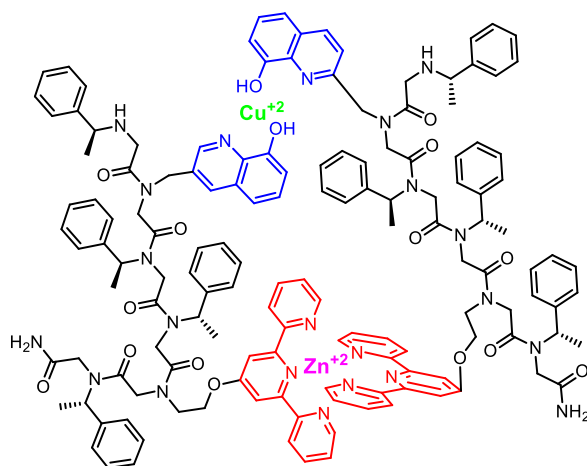

Chemical Formula:  $C_{142}H_{146}CuN_{22}O_{16}Zn^{4+}$   
 Exact Mass: 2541.99  
 Molecular Weight: 2545.74

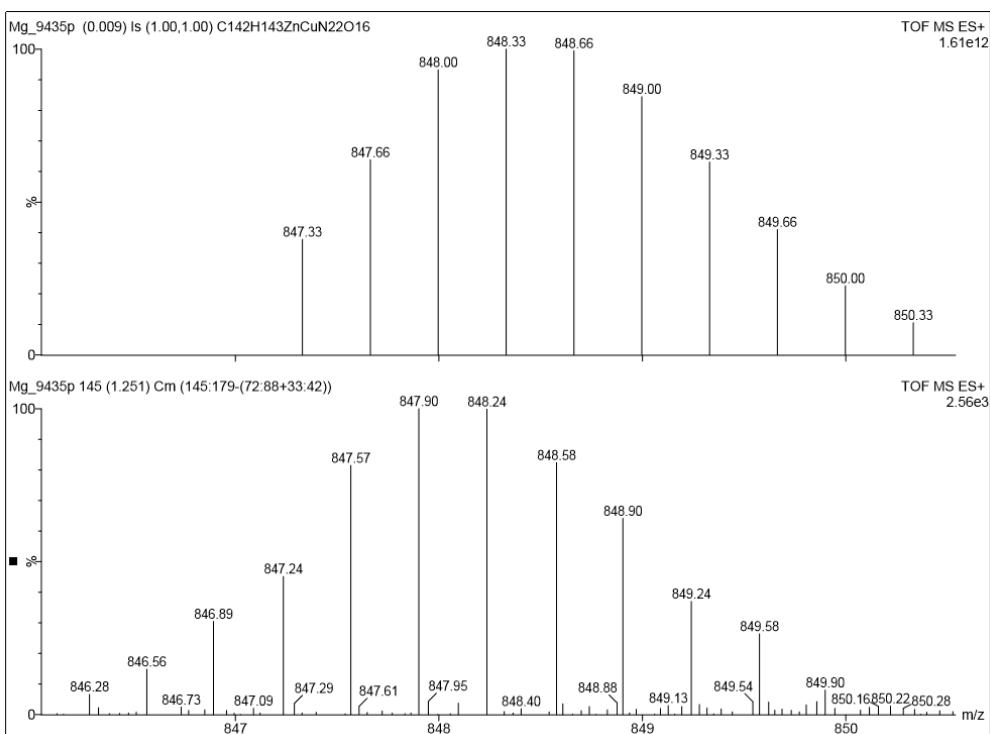

**Figure S88.** ESI-MS  $m/z$  traces of  $(\text{Helix HQT } i+3)_2\text{ZnCu}$  hetero bi-metallic peptoid duplex synthesized by mix approach (bottom) and calculated ESI-MS spectrum (top).

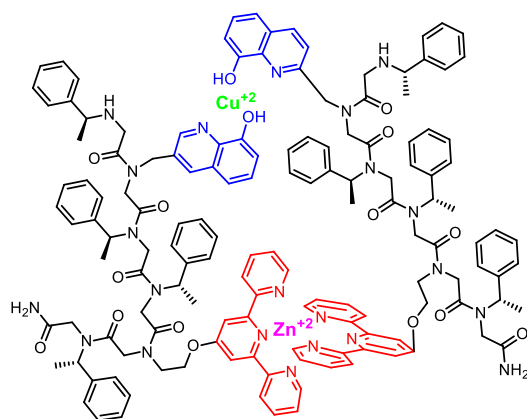

Chemical Formula:  $C_{142}H_{146}CuN_{22}O_{16}Zn^{4+}$   
 Exact Mass: 2541.99  
 Molecular Weight: 2545.74

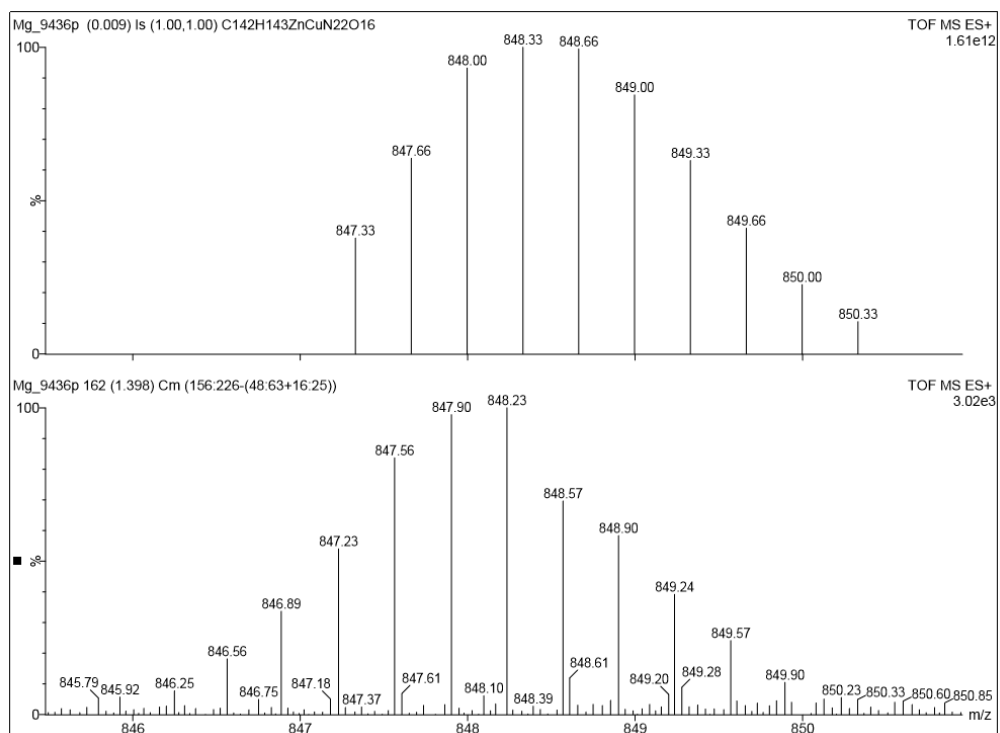

**Figure S89.** Experimental isotopic analysis by ESI-MS  $m/z$  traces of **(Helix HQT i+3)<sub>2</sub>ZnCu** hetero bi-metallic peptoid duplex synthesized by step approach for EPR analysis (bottom) and calculated ESI-MS spectrum (top).

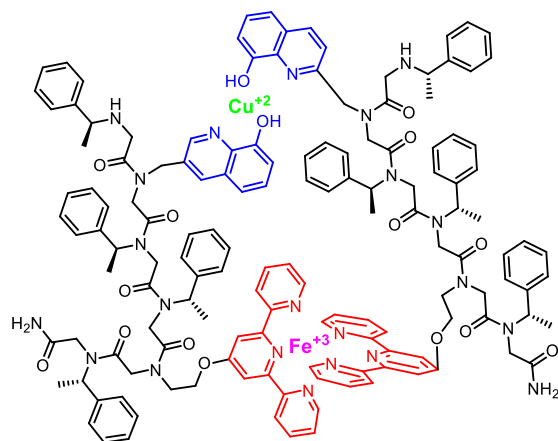

Chemical Formula:  $C_{142}H_{146}CuFeN_{22}O_{16}^{5+}$   
 Exact Mass: 2533.99  
 Molecular Weight: 2536.20

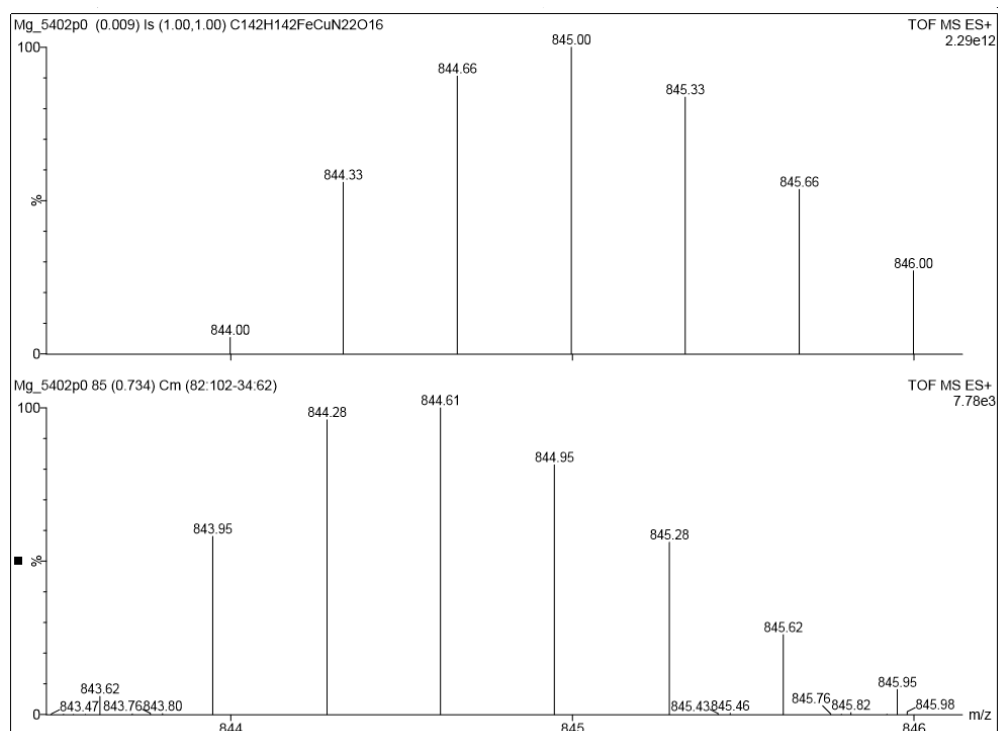

**Figure S90.** Experimental isotopic analysis by ESI-MS  $m/z$  traces of **(Helix HQT i+3)<sub>2</sub>FeCu** hetero bi-metallic peptoid duplex synthesized by mix approach at 50 °C for 2 hours (bottom) and calculated ESI-MS spectrum (top).

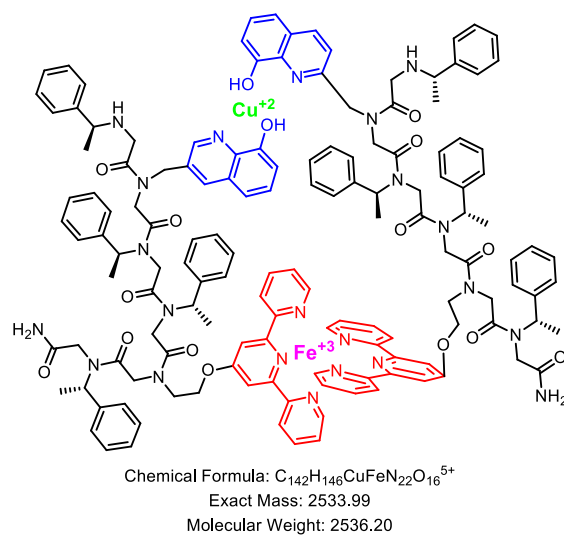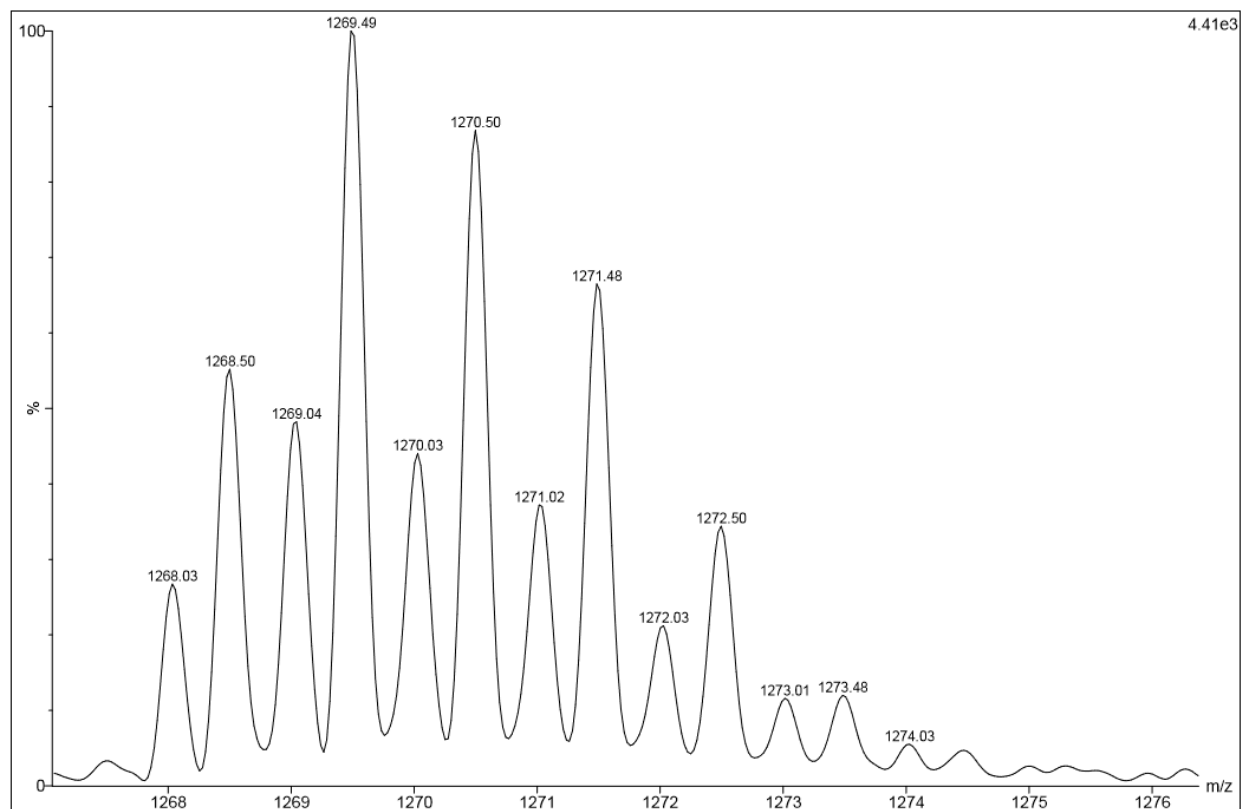

**Figure S91.** MALDI  $m/z$  spectrum of **(Helix HQT i+3)<sub>2</sub>FeCu** hetero bi-metallic peptoid duplex synthesized by step approach.
